# Supplementary material
Source: publisher figshare collection journal article supplement (https://diabetesjournals.figshare.com/ndownloader/files/27952986)
Supplement: Supplementary file 1 [file 27952986]

## Sheet: Neuron
Symbol	Oligodend.avg	EndothelialCells.avg	MuralCells.avg	NG.OPC.avg	PVMMicro.avg	Fibroblast.avg	Ependymocytes.avg	Astrocyte.avg	Tanycyte.avg	Neurons.avg	ParsTuber.avg	Neurons.min.t	Neurons.p	Neurons.FDR	HTM.Basal_3h.avg	HTM.Low_3h.avg	HTM_Low_3h.t	HTM_Low_3h.p	HTM_Low_3h.FDR	HTM_Low_3h.logFC	HTM_Low_3h.FC	Description
Ahi1	8.3	7.47	7.6	8.84	8.26	8.49	8.33	8.37	9.04	11.8	8.53	20.5	1e-06	2.73e-05	9.7	9.51	-1.17	0.247	0.421	-0.238	-1.18	Abelson helper integration site 1 [Source:MGI Symbol;Acc:MGI:87971]
Nap1l5	8.47	7.56	7.6	9.6	8.32	8.35	8.13	8.39	9.13	12	8.44	20.3	1e-06	2.73e-05	10.5	10.6	0.988	0.328	0.508	0.232	1.17	nucleosome assembly protein 1-like 5 [Source:MGI Symbol;Acc:MGI:1923555]
Ttc3	8.59	8.26	8.06	9.89	8.5	9.09	8.7	8.79	9.59	12	9.9	19.1	1e-06	2.73e-05	10.5	10.6	1.1	0.278	0.455	0.103	1.07	tetratricopeptide repeat domain 3 [Source:MGI Symbol;Acc:MGI:1276539]
Gap43	7.85	7.35	7.87	9.42	8.18	8.16	7.33	8.16	8.05	11	7.65	16.8	1e-06	2.73e-05	8.63	8.23	-1.76	0.0845	0.208	-0.339	-1.26	growth associated protein 43 [Source:MGI Symbol;Acc:MGI:95639]
Stmn3	7.78	7.24	7.55	9.06	8.1	8.16	7.29	8.25	8.13	10.7	8.13	14.9	1e-06	2.73e-05	8.42	7.87	-2.2	0.032	0.109	-0.552	-1.47	stathmin-like 3 [Source:MGI Symbol;Acc:MGI:1277137]
Celf4	7.72	7.32	7.41	8.21	8.15	8.22	7.81	8.06	8.13	10.6	7.92	14.7	1e-06	2.73e-05	9.67	9.23	-2.16	0.0355	0.117	-0.269	-1.21	CUGBP, Elav-like family member 4 [Source:MGI Symbol;Acc:MGI:1932407]
Atp1b1	7.72	7.37	8.18	8.59	8.27	8.18	7.76	8	9.02	11.8	10.6	14.4	1e-06	2.73e-05	10.1	10.3	0.735	0.466	0.638	0.0782	1.06	ATPase, Na+/K+ transporting, beta 1 polypeptide [Source:MGI Symbol;Acc:MGI:88108]
Uchl1	8.02	7.47	7.83	8.77	8.08	8.19	8.23	8.09	8.42	10.6	8.59	14.3	1e-06	2.73e-05	9.87	9.49	-2.04	0.046	0.138	-0.377	-1.3	ubiquitin carboxy-terminal hydrolase L1 [Source:MGI Symbol;Acc:MGI:103149]
Bex2	8.25	7.35	7.51	9.11	8.24	8.19	7.78	8.56	8.89	11.1	9.15	14.2	1e-06	2.73e-05	7.53	6.68	-3.75	0.000453	0.0107	-0.904	-1.87	brain expressed X-linked 2 [Source:MGI Symbol;Acc:MGI:1338017]
Caly	7.6	7.19	7.47	8.37	8.07	8.07	7.24	7.84	7.97	10.2	7.45	13.9	1e-06	2.73e-05	7.12	6.17	-4.12	0.000138	0.00702	-1.06	-2.09	calcyon neuron-specific vesicular protein [Source:MGI Symbol;Acc:MGI:1915816]
Tmem130	7.61	7.28	7.41	8.09	8.06	8.11	7.24	8.01	7.95	10.3	7.99	13.9	1e-06	2.73e-05	10.5	10	-2.59	0.0126	0.0604	-0.471	-1.39	transmembrane protein 130 [Source:MGI Symbol;Acc:MGI:3607706]
Ly6h	7.67	7.24	7.47	8.56	8.03	8	7.94	7.89	8.18	10.3	8.96	13.8	1e-06	2.73e-05	8.18	7.52	-3.5	0.000974	0.0148	-0.66	-1.58	lymphocyte antigen 6 complex, locus H [Source:MGI Symbol;Acc:MGI:1346030]
Rtn1	8.5	7.28	7.47	9.83	8.22	8.13	8.59	8.85	8.67	11.3	7.52	13.7	1e-06	2.73e-05	10.2	9.78	-2.93	0.00505	0.0351	-0.404	-1.32	reticulon 1 [Source:MGI Symbol;Acc:MGI:1933947]
Zwint	7.88	7.48	7.93	8.47	8.26	8.18	7.52	8.23	8.46	10.4	8.09	12.7	1e-06	2.73e-05	11	10.8	-1.94	0.058	0.161	-0.214	-1.16	ZW10 interactor [Source:MGI Symbol;Acc:MGI:1289227]
Snhg11	7.87	7.61	7.66	8.35	8.35	8.48	7.59	8.64	8.36	11.2	8.35	12.2	1e-06	2.73e-05	11.9	11.9	-0.964	0.34	0.52	-0.107	-1.08	small nucleolar RNA host gene 11 [Source:MGI Symbol;Acc:MGI:2441845]
Meg3	7.96	7.81	8	8.93	8.65	8.92	8.46	8.93	10.1	11.5	9.96	10.9	1e-06	2.73e-05	9.08	8.67	-2.65	0.0106	0.0546	-0.428	-1.35	maternally expressed 3 [Source:MGI Symbol;Acc:MGI:1202886]
Nrsn2	7.56	7.17	7.36	7.99	8.01	8.03	7.14	7.84	7.92	9.7	7.28	10.5	1e-06	2.73e-05	9.12	8.72	-1.63	0.109	0.246	-0.335	-1.26	neurensin 2 [Source:MGI Symbol;Acc:MGI:2684969]
Zcchc12	7.63	7.21	7.36	8.18	8.09	8.1	7.32	7.89	7.97	9.75	7.86	10.5	1e-06	2.73e-05	9.13	8.79	-1.29	0.202	0.368	-0.263	-1.2	zinc finger, CCHC domain containing 12 [Source:MGI Symbol;Acc:MGI:1919943]
Stmn2	7.61	7.48	8.09	8.04	8.13	8.07	7.25	7.92	8.03	10.2	7.66	10.1	1e-06	2.73e-05	9.38	9.35	0.213	0.833	0.902	0.0259	1.02	stathmin-like 2 [Source:MGI Symbol;Acc:MGI:98241]
Impact	7.86	7.35	7.79	8.21	8.35	8.32	7.7	8.17	8.52	9.98	7.94	9.63	1e-06	2.73e-05	9.99	10.3	1.99	0.0524	0.151	0.355	1.28	impact, RWD domain protein [Source:MGI Symbol;Acc:MGI:1098233]
Maged1	8.48	7.65	8.05	9.18	8.2	8.95	8.23	8.49	9.51	10.3	9.19	9.6	1e-06	2.73e-05	9.72	9.17	-4.32	7.15e-05	0.00601	-0.625	-1.54	melanoma antigen, family D, 1 [Source:MGI Symbol;Acc:MGI:1930187]
Pcsk1n	8.62	7.34	7.74	9.82	8.3	8.31	8.47	9.34	9.46	11.3	9.95	9.34	1e-06	2.73e-05	9.46	8.59	-3.18	0.00249	0.0238	-0.92	-1.89	proprotein convertase subtilisin/kexin type 1 inhibitor [Source:MGI Symbol;Acc:MGI:1353431]
Tmem59l	7.59	7.26	7.41	8.28	8.01	8.02	7.56	7.89	7.99	9.63	8.06	9.28	1e-06	2.73e-05	9.16	9.04	0.113	0.91	0.949	0.0203	1.01	transmembrane protein 59-like [Source:MGI Symbol;Acc:MGI:1915187]
Gprasp1	7.93	7.51	7.36	8.47	8.25	8.4	8.23	8.39	8.97	10.1	8.35	9.25	1e-06	2.73e-05	10.6	10.5	-1.14	0.258	0.434	-0.141	-1.1	G protein-coupled receptor associated sorting protein 1 [Source:MGI Symbol;Acc:MGI:1917418]
Pnmal2	7.96	7.29	7.41	8.7	8.1	8.62	7.73	8.22	8.77	10	9.19	9.05	1e-06	2.73e-05	9.6	8.99	-3.97	0.000222	0.00823	-0.66	-1.58	PNMA-like 2 [Source:MGI Symbol;Acc:MGI:3645856]
Peg3	7.85	7.41	7.66	8.76	8.19	8.42	7.7	8.49	9.09	10.2	8.99	8.95	1e-06	2.73e-05	10.5	10.9	2.43	0.0184	0.0774	0.487	1.4	paternally expressed 3 [Source:MGI Symbol;Acc:MGI:104748]
Tmx4	7.8	7.64	7.71	8.39	8.29	8.23	7.63	8.09	8.73	9.78	8.03	8.79	1e-06	2.73e-05	9.37	9.74	2.5	0.0154	0.069	0.497	1.41	thioredoxin-related transmembrane protein 4 [Source:MGI Symbol;Acc:MGI:106558]
Calm2	8.73	8.5	9.55	9.46	9.71	9.34	9.52	8.6	9.53	11.2	10	7.97	1e-06	2.73e-05	9.85	9.79	0.687	0.495	0.66	0.0962	1.07	calmodulin 2 [Source:MGI Symbol;Acc:MGI:103250]
Ngfrap1	8.35	7.57	7.66	9.01	8.13	8.65	8.88	8.6	9.26	10.2	9.17	7.88	1e-06	2.73e-05	6.87	6.32	-2.5	0.0156	0.0695	-0.4	-1.32	nerve growth factor receptor (TNFRSF16) associated protein 1 [Source:MGI Symbol;Acc:MGI:1338016]
Mdh1	8.51	7.81	8.16	8.78	8.55	8.55	8.32	8.6	9.17	10.2	9.26	7.81	1e-06	2.73e-05	9.56	9.61	-0.124	0.901	0.944	-0.0176	-1.01	malate dehydrogenase 1, NAD (soluble) [Source:MGI Symbol;Acc:MGI:97051]
Bex1	7.77	7.24	7.3	8.48	8.09	8.15	7.43	8.06	8.74	9.6	8.71	7.77	1e-06	2.73e-05	6.49	5.9	-3.11	0.00307	0.0265	-0.556	-1.47	brain expressed gene 1 [Source:MGI Symbol;Acc:MGI:1328321]
Rab3a	8.05	7.31	7.84	8.13	8.08	8.16	7.31	7.84	8.05	9.45	7.74	7.65	1e-06	2.73e-05	8.33	8.06	-1.85	0.0698	0.183	-0.312	-1.24	RAB3A, member RAS oncogene family [Source:MGI Symbol;Acc:MGI:97843]
Gaa	7.8	7.43	7.52	8.27	8.23	8.59	7.69	8.5	8.64	10	8.6	7.55	1e-06	2.73e-05	10.4	9.92	-3.61	0.000683	0.0127	-0.622	-1.54	glucosidase, alpha, acid [Source:MGI Symbol;Acc:MGI:95609]
Fkbp3	8.79	8.43	8.68	9.21	8.58	8.87	8.73	8.91	9.55	10.5	9.17	7.52	1e-06	2.73e-05	6.09	5.9	0.125	0.901	0.943	0.0226	1.02	FK506 binding protein 3 [Source:MGI Symbol;Acc:MGI:1353460]
Snap25	7.61	7.21	7.52	8.28	8.04	8.05	7.25	7.84	7.94	9.32	8.13	7.51	1e-06	2.73e-05	10.1	10.4	2.58	0.0127	0.0608	0.344	1.27	synaptosomal-associated protein 25 [Source:MGI Symbol;Acc:MGI:98331]
Pgrmc1	7.89	7.73	8.11	8.44	8.07	9.01	8.02	8.37	9	9.88	8.42	7.36	1e-06	2.73e-05	9.01	8.87	-1.04	0.304	0.484	-0.146	-1.11	progesterone receptor membrane component 1 [Source:MGI Symbol;Acc:MGI:1858305]
Gpx3	7.55	7.21	7.47	8.06	8.16	8.42	7.48	7.84	8.02	9.34	7.51	7.33	1e-06	2.73e-05	7.69	6.94	-2.34	0.0234	0.0897	-0.743	-1.67	glutathione peroxidase 3 [Source:MGI Symbol;Acc:MGI:105102]
Zcchc18	7.97	7.26	7.47	8.76	8.1	8.17	9.12	8.95	9.5	10.3	8.29	7.31	1e-06	2.73e-05	8.95	8.75	-1.93	0.0595	0.164	-0.214	-1.16	zinc finger, CCHC domain containing 18 [Source:MGI Symbol;Acc:MGI:1914245]
Nsg1	7.78	7.25	7.47	8.92	8	8.16	7.41	8.09	8.22	9.54	7.69	7.29	1e-06	2.73e-05	7.76	7.41	-3.11	0.00307	0.0265	-0.411	-1.33	neuron specific gene family member 1 [Source:MGI Symbol;Acc:MGI:109149]
Ndn	7.86	7.34	7.75	8.38	8.27	8.44	7.81	8.12	9.27	10.1	8.43	7.17	1e-06	2.73e-05	9.11	8.54	-2.34	0.0234	0.0897	-0.556	-1.47	necdin [Source:MGI Symbol;Acc:MGI:97290]
Gprasp2	7.61	7.26	7.36	8.21	8.06	8.16	7.87	8.12	8.56	9.48	7.99	7.06	1e-06	2.73e-05	9.53	9.48	0.102	0.919	0.954	0.0202	1.01	G protein-coupled receptor associated sorting protein 2 [Source:MGI Symbol;Acc:MGI:2442071]
Pld3	7.83	7.38	7.71	8.25	8.66	8.33	7.44	8.26	8.29	9.66	8.34	6.93	1e-06	2.73e-05	8.99	8.4	-3.34	0.00156	0.0188	-0.622	-1.54	phospholipase D family, member 3 [Source:MGI Symbol;Acc:MGI:1333782]
Nsg2	7.58	7.19	7.36	8.45	8.04	8.02	7.59	7.95	8.05	9.26	7.8	6.82	1e-06	2.73e-05	9.22	8.96	-2.29	0.0261	0.0958	-0.208	-1.16	neuron specific gene family member 2 [Source:MGI Symbol;Acc:MGI:1202070]
Map7d2	7.97	7.21	7.78	8.5	8.06	8.06	7.23	8.09	8.23	9.46	7.58	6.71	1e-06	2.73e-05	8.38	8.38	0.916	0.364	0.545	0.123	1.09	MAP7 domain containing 2 [Source:MGI Symbol;Acc:MGI:1917474]
Rufy3	8.22	7.31	7.49	8.64	8.09	8.07	7.31	7.89	8.13	9.18	7.59	6.66	1e-06	2.73e-05	8.43	8.56	1.77	0.0831	0.205	0.163	1.12	RUN and FYVE domain containing 3 [Source:MGI Symbol;Acc:MGI:106484]
Snrpn	8.29	7.21	7.47	8.39	8.02	8.03	7.38	8.23	8.36	9.55	7.86	6.53	1e-06	2.73e-05	8.96	8.68	-1.78	0.0812	0.202	-0.33	-1.26	small nuclear ribonucleoprotein N [Source:MGI Symbol;Acc:MGI:98347]
Syt5	7.55	7.17	7.36	7.97	7.96	8.03	7.42	7.84	7.97	9.13	7.48	6.49	1e-06	2.73e-05	7.25	6.57	-4.37	5.98e-05	0.00601	-0.725	-1.65	synaptotagmin V [Source:MGI Symbol;Acc:MGI:1926368]
A730017C20Rik	7.6	7.21	7.36	8.42	8.04	8.1	7.4	8.01	8.1	9.25	7.45	6.31	1e-06	2.73e-05	7.76	7.44	-1.44	0.155	0.309	-0.271	-1.21	RIKEN cDNA A730017C20 gene [Source:MGI Symbol;Acc:MGI:2442934]
Pcp4	7.64	7.24	7.44	8.4	8.17	8.19	7.38	7.95	8.16	9.49	7.46	6.24	1e-06	2.73e-05	3.64	3.37	-1.23	0.224	0.395	-0.481	-1.4	Purkinje cell protein 4 [Source:MGI Symbol;Acc:MGI:97509]
Hap1	7.6	7.33	7.55	8.13	8.1	8.03	7.6	7.89	8.23	9.15	7.73	6.05	1e-06	2.73e-05	10.2	9.51	-3.49	0.000998	0.0151	-0.687	-1.61	huntingtin-associated protein 1 [Source:MGI Symbol;Acc:MGI:1261831]
Eno2	7.58	7.17	7.47	8.1	8.02	8.02	7.24	7.84	8.03	9.04	7.57	6.03	1e-06	2.73e-05	9.9	9.59	-2.63	0.0113	0.0568	-0.387	-1.31	enolase 2, gamma neuronal [Source:MGI Symbol;Acc:MGI:95394]
Atpif1	8.5	8.13	8.49	9.13	9.36	8.94	9.1	8.8	9.19	10.1	9.45	5.93	1e-06	2.73e-05	5.64	5.36	-1.31	0.196	0.362	-0.362	-1.29	ATPase inhibitory factor 1 [Source:MGI Symbol;Acc:MGI:1196457]
Nrsn1	7.57	7.19	7.36	8.14	8.07	8.06	7.19	7.98	7.94	9.16	8.04	5.89	1e-06	2.73e-05	8.29	8.39	0.316	0.753	0.851	0.0418	1.03	neurensin 1 [Source:MGI Symbol;Acc:MGI:894662]
Gnas	10.6	11.4	11.2	11.1	10.5	11.6	10.3	10.8	11.2	12.4	11.9	5.88	1e-06	2.73e-05	6.71	6.05	-3.04	0.00367	0.0293	-0.68	-1.6	GNAS (guanine nucleotide binding protein, alpha stimulating) complex locus [Source:MGI Symbol;Acc:MGI:95777]
Ndrg4	7.6	7.24	7.36	8.2	8.02	8	7.18	8.01	7.94	9.12	7.36	5.57	1e-06	2.73e-05	10.3	10.4	0.843	0.403	0.583	0.0866	1.06	N-myc downstream regulated gene 4 [Source:MGI Symbol;Acc:MGI:2384590]
Mllt11	7.9	7.28	7.36	8.08	8.06	8.07	7.2	7.95	7.96	9.08	7.39	5.56	1e-06	2.73e-05	6.92	6.59	-2.68	0.00979	0.0521	-0.433	-1.35	myeloid/lymphoid or mixed-lineage leukemia (trithorax homolog, Drosophila); translocated to, 11 [Source:MGI Symbol;Acc:MGI:1929671]
Acot7	8.71	7.21	7.36	8.25	8.02	8.1	7.4	7.98	8.23	9.14	7.94	5.49	1e-06	2.73e-05	7.12	6.66	-2.48	0.0165	0.0722	-0.532	-1.45	acyl-CoA thioesterase 7 [Source:MGI Symbol;Acc:MGI:1917275]
Gnao1	8.22	7.17	7.47	8.22	8.1	8.16	7.51	8.06	8.19	9.18	8.3	5.39	1e-06	2.73e-05	9.5	9.47	-1.33	0.188	0.351	-0.106	-1.08	guanine nucleotide binding protein, alpha O [Source:MGI Symbol;Acc:MGI:95775]
Rit2	7.6	7.24	7.36	8.47	8.02	8.03	7.87	7.89	7.99	8.98	7.55	5.3	1e-06	2.73e-05	6.68	6.81	0.443	0.659	0.787	0.0801	1.06	Ras-like without CAAX 2 [Source:MGI Symbol;Acc:MGI:108054]
Ywhah	7.9	7.56	8.04	8.22	8.56	8.25	7.39	8.01	8.11	9.18	7.67	5.19	1e-06	2.73e-05	8.05	7.91	-0.898	0.373	0.553	-0.133	-1.1	tyrosine 3-monooxygenase/tryptophan 5-monooxygenase activation protein, eta polypeptide [Source:MGI Symbol;Acc:MGI:109194]
Atp1a3	7.56	7.21	7.3	8.14	8.03	8.03	7.17	7.89	7.91	8.9	7.35	4.94	1e-06	2.73e-05	11.4	11.2	-2.21	0.0319	0.109	-0.348	-1.27	ATPase, Na+/K+ transporting, alpha 3 polypeptide [Source:MGI Symbol;Acc:MGI:88107]
Ociad1	8.77	7.87	8.07	8.68	8.52	8.7	8.34	8.54	8.75	9.59	8.57	4.93	1e-06	2.73e-05	7.33	7.42	0.428	0.671	0.794	0.046	1.03	OCIA domain containing 1 [Source:MGI Symbol;Acc:MGI:1915345]
Ywhag	7.88	7.43	7.71	8.26	8.32	8.33	7.41	8.06	8.17	9.06	7.61	4.92	1e-06	2.73e-05	10.5	10.5	-0.706	0.483	0.651	-0.0672	-1.05	tyrosine 3-monooxygenase/tryptophan 5-monooxygenase activation protein, gamma polypeptide [Source:MGI Symbol;Acc:MGI:108109]
mt-Nd1	11.4	11.1	10.8	10.8	11.3	11.2	9.57	11.5	11.6	12.4	11.7	4.9	1e-06	2.73e-05	11.6	11.8	1.22	0.228	0.4	0.206	1.15	mitochondrially encoded NADH dehydrogenase 1 [Source:MGI Symbol;Acc:MGI:101787]
Syt1	7.59	7.17	7.36	8.15	8.07	8.05	7.2	7.89	7.93	9.07	7.58	4.8	1e-06	2.73e-05	9.99	10.3	2.89	0.00562	0.0374	0.413	1.33	synaptotagmin I [Source:MGI Symbol;Acc:MGI:99667]
Rrp1	8.68	8.41	8.29	8.77	8.5	8.59	8.73	8.89	8.96	9.93	9.06	4.67	1e-06	2.73e-05	7.43	6.77	-3.74	0.000455	0.0107	-0.762	-1.7	ribosomal RNA processing 1 homolog (S. cerevisiae) [Source:MGI Symbol;Acc:MGI:1203500]
Gng3	8.09	7.24	7.41	9.36	8.09	8.08	7.27	7.95	8.01	9.81	7.56	4.64	1e-06	2.73e-05	7.77	7.49	-1.82	0.0752	0.192	-0.255	-1.19	guanine nucleotide binding protein (G protein), gamma 3 [Source:MGI Symbol;Acc:MGI:102704]
Tagln3	7.59	7.19	7.3	8.27	8.12	8.08	7.33	8.12	7.94	9.13	7.3	4.62	1e-06	2.73e-05	6.52	5.91	-2.51	0.0152	0.0683	-0.809	-1.75	transgelin 3 [Source:MGI Symbol;Acc:MGI:1926784]
Snap47	7.83	7.4	7.58	8.37	8.08	8.24	7.61	8.12	8.3	9.1	7.92	4.62	1e-06	2.73e-05	8.88	8.63	-1.23	0.223	0.394	-0.184	-1.14	synaptosomal-associated protein, 47 [Source:MGI Symbol;Acc:MGI:1915076]
Camta1	7.8	7.37	7.49	8.31	8.11	8.15	7.45	7.89	8.12	8.9	7.6	4.58	1e-06	2.73e-05	9.2	9.62	2.95	0.00478	0.034	0.484	1.4	calmodulin binding transcription activator 1 [Source:MGI Symbol;Acc:MGI:2140230]
Atp6v0b	9.12	7.74	8.01	8.79	8.89	8.44	7.71	8.49	8.59	9.5	8.42	4.48	1e-06	2.73e-05	7.67	7.17	-2.5	0.0157	0.0697	-0.438	-1.36	ATPase, H+ transporting, lysosomal V0 subunit B [Source:MGI Symbol;Acc:MGI:1890510]
Pak3	7.82	7.28	7.3	8.18	8.04	8.02	7.42	7.84	8.12	8.82	7.6	4.45	1e-06	2.73e-05	8.52	8.83	2.48	0.0166	0.0725	0.507	1.42	p21 protein (Cdc42/Rac)-activated kinase 3 [Source:MGI Symbol;Acc:MGI:1339656]
Kif21a	8.5	7.22	7.45	8.08	8.07	8.08	8.47	8.11	8.18	9.16	8.27	4.41	1e-06	2.73e-05	8.51	8.74	2.08	0.042	0.13	0.184	1.14	kinesin family member 21A [Source:MGI Symbol;Acc:MGI:109188]
Aldoa	8.8	7.9	8.74	8.57	8.72	8.91	8.3	8.81	9.44	9.84	9.05	4.41	1e-06	2.73e-05	10	9.64	-2.57	0.0132	0.0625	-0.396	-1.32	aldolase A, fructose-bisphosphate [Source:MGI Symbol;Acc:MGI:87994]
Ywhab	8.92	8.94	9.21	9.4	9.07	8.86	8.02	8.89	8.9	10.2	9.12	4.29	1e-06	2.73e-05	10	9.88	0.326	0.746	0.846	0.0335	1.02	tyrosine 3-monooxygenase/tryptophan 5-monooxygenase activation protein, beta polypeptide [Source:MGI Symbol;Acc:MGI:1891917]
Prkar1b	7.6	7.19	7.41	8.04	8.03	8.11	7.23	7.84	7.95	8.71	7.38	4.21	1e-06	2.73e-05	9.86	9.66	-1.75	0.0855	0.209	-0.221	-1.17	protein kinase, cAMP dependent regulatory, type I beta [Source:MGI Symbol;Acc:MGI:97759]
Tubb3	7.78	7.22	7.47	8.05	8.01	8.03	7.17	7.84	7.94	8.75	7.3	4.21	1e-06	2.73e-05	7.14	6.73	-2.31	0.0247	0.0925	-0.733	-1.66	tubulin, beta 3 class III [Source:MGI Symbol;Acc:MGI:107813]
Ubb	9.88	9.16	9.78	9.96	9.24	9.74	9.2	8.95	10.3	10.8	10.4	4.21	1e-06	2.73e-05	8.96	8.67	-1.94	0.0579	0.161	-0.398	-1.32	ubiquitin B [Source:MGI Symbol;Acc:MGI:98888]
Pja1	8.02	7.38	7.78	8.52	8.1	8.63	7.4	8.09	8.38	9.13	8.44	4.2	1e-06	2.73e-05	7.92	7.48	-3.91	0.00027	0.00883	-0.454	-1.37	praja ring finger 1, E3 ubiquitin protein ligase [Source:MGI Symbol;Acc:MGI:1101765]
Celf6	7.56	7.19	7.3	8.01	7.99	8.03	7.14	7.89	7.92	8.74	7.47	4.11	1e-06	2.73e-05	6.31	5.81	-3.46	0.00109	0.0158	-0.559	-1.47	CUGBP, Elav-like family member 6 [Source:MGI Symbol;Acc:MGI:1923433]
Wdr6	7.66	7.28	7.47	8.13	8.08	8.07	7.69	8.09	8.47	8.96	8.31	4	1e-06	2.73e-05	10.1	9.9	-1.62	0.111	0.248	-0.268	-1.2	WD repeat domain 6 [Source:MGI Symbol;Acc:MGI:1930140]
Cited1	7.57	7.19	7.36	8.18	7.99	8.03	7.24	7.89	8.44	8.96	7.39	3.96	1e-06	2.73e-05	4.57	3.05	-5.75	4.78e-07	0.00213	-1.49	-2.82	Cbp/p300-interacting transactivator with Glu/Asp-rich carboxy-terminal domain 1 [Source:MGI Symbol;Acc:MGI:108023]
Nme1	8.6	7.62	7.84	8.87	8.53	8.44	7.84	8.83	8.72	9.73	8.64	3.93	1e-06	2.73e-05	6.4	6.26	0.713	0.479	0.648	0.0986	1.07	NME/NM23 nucleoside diphosphate kinase 1 [Source:MGI Symbol;Acc:MGI:97355]
Slc25a4	10.5	8.8	9.57	10.9	8.89	10.3	9.47	10.8	10.8	11.5	9.9	3.87	1e-06	2.73e-05	8.7	8.45	-1.49	0.143	0.294	-0.217	-1.16	solute carrier family 25 (mitochondrial carrier, adenine nucleotide translocator), member 4 [Source:MGI Symbol;Acc:MGI:1353495]
Tcf25	8.92	8.27	8.84	8.82	8.73	9.02	8.52	8.82	9.18	9.84	9.45	3.86	1e-06	2.73e-05	9.05	8.88	-2.35	0.0228	0.0881	-0.262	-1.2	transcription factor 25 (basic helix-loop-helix) [Source:MGI Symbol;Acc:MGI:1914105]
Pja2	8.21	7.64	8.09	8.51	8.28	8.45	8.15	8.26	8.55	9.16	8.23	3.68	1e-06	2.73e-05	9.2	9.41	1.73	0.09	0.217	0.172	1.13	praja 2, RING-H2 motif containing [Source:MGI Symbol;Acc:MGI:2159342]
G3bp2	8.61	8.29	8.81	8.9	8.61	8.51	8.07	8.67	8.99	9.72	9.25	3.63	1e-06	2.73e-05	8.24	8.54	2.76	0.00808	0.0462	0.4	1.32	GTPase activating protein (SH3 domain) binding protein 2 [Source:MGI Symbol;Acc:MGI:2442040]
Mtch1	8.38	7.65	7.92	8.36	8.41	8.75	7.62	8.39	8.95	9.19	8.3	3.6	1e-06	2.73e-05	8.25	7.65	-3.11	0.00305	0.0265	-0.614	-1.53	mitochondrial carrier homolog 1 (C. elegans) [Source:MGI Symbol;Acc:MGI:1929261]
Faim2	7.99	7.21	7.3	8.2	7.98	8.02	7.23	7.84	7.99	8.61	7.33	3.58	1e-06	2.73e-05	9.43	9.11	-2.97	0.00454	0.0329	-0.381	-1.3	Fas apoptotic inhibitory molecule 2 [Source:MGI Symbol;Acc:MGI:1919643]
Pcmt1	8.09	7.84	7.7	8.47	8.44	8.32	8.28	8.23	8.65	9.03	8.47	3.58	1e-06	2.73e-05	7.37	7.49	1.64	0.107	0.243	0.158	1.12	protein-L-isoaspartate (D-aspartate) O-methyltransferase 1 [Source:MGI Symbol;Acc:MGI:97502]
2210016L21Rik	8.32	7.89	8.02	8.7	8.22	8.62	8.07	8.54	8.59	9.34	8.28	3.57	1e-06	2.73e-05	5.86	5.18	-3.94	0.000245	0.00853	-0.799	-1.74	RIKEN cDNA 2210016L21 gene [Source:MGI Symbol;Acc:MGI:1919607]
Gad2	7.58	7.29	7.41	7.99	8.08	8.06	7.19	7.84	7.92	8.76	7.3	3.55	1e-06	2.73e-05	8.93	8.82	-0.202	0.84	0.907	-0.0368	-1.03	glutamic acid decarboxylase 2 [Source:MGI Symbol;Acc:MGI:95634]
Gnl3l	8	7.28	7.55	8.21	8.02	8.13	7.42	8.01	8.28	8.79	7.82	3.53	1e-06	2.73e-05	8.77	8.96	1.37	0.176	0.337	0.221	1.17	guanine nucleotide binding protein-like 3 (nucleolar)-like [Source:MGI Symbol;Acc:MGI:2448557]
Atp6v1d	8.16	7.78	7.74	8.43	8.4	8.35	8.03	8.43	8.6	9.28	8.29	3.5	1e-06	2.73e-05	8.12	8.14	1.8	0.0776	0.196	0.287	1.22	ATPase, H+ transporting, lysosomal V1 subunit D [Source:MGI Symbol;Acc:MGI:1921084]
Tspyl4	8.17	7.21	7.47	8.46	8.01	8.12	7.55	8.09	8.24	8.93	7.66	3.49	1e-06	2.73e-05	9.74	9.91	1.83	0.0734	0.189	0.207	1.15	TSPY-like 4 [Source:MGI Symbol;Acc:MGI:106393]
Kif5c	7.67	7.25	7.3	8.16	8.13	8.07	7.21	8	8.1	8.79	7.66	3.47	1e-06	2.73e-05	9.65	9.97	3.38	0.0014	0.0178	0.324	1.25	kinesin family member 5C [Source:MGI Symbol;Acc:MGI:1098269]
Tubb2a	7.94	7.57	8.32	8.94	8.32	8.31	8	8.93	8.65	9.76	7.88	3.44	1e-06	2.73e-05	7.79	7.2	-3.12	0.00294	0.0259	-0.664	-1.58	tubulin, beta 2A class IIA [Source:MGI Symbol;Acc:MGI:107861]
Timm8b	8.44	7.52	7.76	8.45	8.32	8.43	7.55	8.23	8.62	9.06	8.19	3.38	1e-06	2.73e-05	3.98	3.62	-1.38	0.174	0.335	-0.557	-1.47	translocase of inner mitochondrial membrane 8B [Source:MGI Symbol;Acc:MGI:1353424]
Chd3os	7.61	7.45	7.47	8.14	8.02	8.08	7.76	8.09	8.43	8.91	7.49	3.37	1e-06	2.73e-05	7.32	7.32	0.0624	0.95	0.972	0.00769	1.01	chromodomain helicase DNA binding protein 3, opposite strand [Source:MGI Symbol;Acc:MGI:1915359]
Araf	8.12	7.53	7.7	8.32	8.11	8.27	7.47	8.26	8.31	9.03	7.91	3.36	1e-06	2.73e-05	7.52	7.26	-2.95	0.00474	0.0339	-0.309	-1.24	v-raf murine sarcoma 3611 viral oncogene homolog [Source:MGI Symbol;Acc:MGI:88065]
Nenf	7.94	7.81	7.98	8.36	8.33	8.77	8.11	8.43	8.57	9.24	8.86	3.36	1e-06	2.73e-05	4.04	3.37	-2.7	0.00933	0.0504	-0.823	-1.77	neuron derived neurotrophic factor [Source:MGI Symbol;Acc:MGI:1913458]
Stxbp1	7.67	7.51	7.75	8.13	8.06	8.14	7.19	7.89	7.99	8.6	7.52	3.32	1e-06	2.73e-05	10.3	10.2	-2.02	0.0483	0.143	-0.207	-1.15	syntaxin binding protein 1 [Source:MGI Symbol;Acc:MGI:107363]
Camk2b	7.55	7.19	7.3	8.09	8.03	8.02	7.24	7.95	7.93	8.68	7.37	3.31	1e-06	2.73e-05	9.01	8.56	-3.42	0.00124	0.0169	-0.553	-1.47	calcium/calmodulin-dependent protein kinase II, beta [Source:MGI Symbol;Acc:MGI:88257]
Pnck	7.55	7.17	7.3	8.08	7.99	8.05	7.44	7.89	7.98	8.64	7.41	3.25	1e-06	2.73e-05	7.46	6.72	-3.8	0.000377	0.00996	-0.759	-1.69	pregnancy upregulated non-ubiquitously expressed CaM kinase [Source:MGI Symbol;Acc:MGI:1347357]
Rangap1	7.99	7.36	7.68	8.17	8.24	8.16	7.49	8.03	8.19	8.76	7.62	3.25	1e-06	2.73e-05	8.12	7.81	-2.23	0.0303	0.105	-0.315	-1.24	RAN GTPase activating protein 1 [Source:MGI Symbol;Acc:MGI:103071]
Ddx24	8.23	8.03	8.2	8.49	8.51	8.4	8.1	8.5	8.6	9.32	8.24	3.21	1e-06	2.73e-05	7.78	7.46	-2.89	0.00563	0.0374	-0.362	-1.28	DEAD (Asp-Glu-Ala-Asp) box polypeptide 24 [Source:MGI Symbol;Acc:MGI:1351337]
Klc1	8.26	8.17	7.99	8.33	8.19	8.35	7.64	8.34	8.3	9.05	7.87	3.12	1e-06	2.73e-05	9.08	8.75	-2.28	0.0266	0.0968	-0.37	-1.29	kinesin light chain 1 [Source:MGI Symbol;Acc:MGI:107978]
Hsph1	8.14	7.49	7.52	8.35	8.23	8.27	8.96	8.12	8.48	9.34	8	3.1	1e-06	2.73e-05	8.77	8.91	2.33	0.0239	0.0907	0.292	1.22	heat shock 105kDa/110kDa protein 1 [Source:MGI Symbol;Acc:MGI:105053]
Sub1	8.39	8.19	8.28	8.93	8.88	8.84	8.05	9.09	9.54	9.85	9.36	3.04	1e-06	2.73e-05	7.67	7.65	0.756	0.453	0.626	0.104	1.07	SUB1 homolog (S. cerevisiae) [Source:MGI Symbol;Acc:MGI:104811]
Atp6v1b2	7.94	7.32	7.68	8.39	8.25	8.17	7.35	8.15	8.14	8.87	8.02	3.01	1e-06	2.73e-05	9.85	9.72	-1.93	0.0593	0.164	-0.197	-1.15	ATPase, H+ transporting, lysosomal V1 subunit B2 [Source:MGI Symbol;Acc:MGI:109618]
Fxyd6	7.74	7.27	7.41	9.15	8.05	8.62	7.18	7.84	7.99	9.42	7.39	3.01	1e-06	2.73e-05	7.53	6.68	-3.66	0.000591	0.0118	-0.922	-1.89	FXYD domain-containing ion transport regulator 6 [Source:MGI Symbol;Acc:MGI:1890226]
Rab3c	7.56	7.19	7.36	8.14	8.04	8.07	7.22	7.89	7.92	8.62	7.5	3	1e-06	2.73e-05	10.2	10.5	3.08	0.00331	0.0276	0.428	1.35	RAB3C, member RAS oncogene family [Source:MGI Symbol;Acc:MGI:1914545]
Tecr	9.44	7.62	8.01	9.19	8.35	8.53	8.05	9.29	8.76	9.98	8.49	2.96	1e-06	2.73e-05	8.41	8.36	0.57	0.571	0.722	0.0971	1.07	trans-2,3-enoyl-CoA reductase [Source:MGI Symbol;Acc:MGI:1915408]
Psmb1	9.39	8.89	8.91	9.44	8.97	8.9	8.34	8.98	8.99	9.75	8.59	2.91	1e-06	2.73e-05	6.42	6.23	-1.16	0.25	0.425	-0.181	-1.13	proteasome (prosome, macropain) subunit, beta type 1 [Source:MGI Symbol;Acc:MGI:104884]
Gabarapl1	8.35	8.07	7.84	8.55	8.27	8.68	8.27	8.68	8.56	9.37	8.17	2.84	1e-06	2.73e-05	8.04	7.56	-3.07	0.00344	0.0281	-0.587	-1.5	gamma-aminobutyric acid (GABA) A receptor-associated protein-like 1 [Source:MGI Symbol;Acc:MGI:1914980]
Cmip	8.3	7.28	8.05	8.29	8.35	8.23	7.93	8.57	8.06	9.19	7.93	2.83	1e-06	2.73e-05	9.1	8.65	-4.32	7.04e-05	0.00601	-0.442	-1.36	c-Maf inducing protein [Source:MGI Symbol;Acc:MGI:1921690]
Mesdc2	7.93	7.74	7.87	8.5	8.17	8.36	7.92	8.25	8.58	8.95	8.37	2.77	1e-06	2.73e-05	6.22	5.69	-4.13	0.000131	0.00689	-0.596	-1.51	mesoderm development candidate 2 [Source:MGI Symbol;Acc:MGI:1891421]
Gm1673	7.75	7.36	7.44	8.65	8.2	8.21	8.37	8.58	8.51	9.24	8.1	2.7	1e-06	2.73e-05	3.41	2.82	-2.02	0.0488	0.144	-1.03	-2.05	predicted gene 1673 [Source:MGI Symbol;Acc:MGI:2686519]
Nsf	7.73	7.36	7.71	8.24	8.11	8.08	7.34	8.01	8.02	8.63	7.6	2.63	1e-06	2.73e-05	9.49	9.51	-0.756	0.453	0.626	-0.087	-1.06	N-ethylmaleimide sensitive fusion protein [Source:MGI Symbol;Acc:MGI:104560]
Pcbd1	7.58	7.17	7.36	8.13	8.01	8.07	7.52	7.89	8.01	8.53	7.64	2.59	1e-06	2.73e-05	4.21	3.49	-3.18	0.0025	0.0238	-0.974	-1.96	pterin 4 alpha carbinolamine dehydratase/dimerization cofactor of hepatocyte nuclear factor 1 alpha (TCF1) 1 [Source:MGI Symbol;Acc:MGI:94873]
Prkacb	8.19	7.56	8.09	8.19	8.21	8.22	7.58	8.36	8.32	8.94	7.88	2.58	1e-06	2.73e-05	9.84	9.84	0.656	0.515	0.677	0.0911	1.07	protein kinase, cAMP dependent, catalytic, beta [Source:MGI Symbol;Acc:MGI:97594]
Hsp90ab1	12	11.3	11.6	11.5	10.9	11.4	12	10.8	11.8	12.4	12.3	2.58	1e-06	2.73e-05	9.97	9.48	-3.3	0.00176	0.0199	-0.629	-1.55	heat shock protein 90 alpha (cytosolic), class B member 1 [Source:MGI Symbol;Acc:MGI:96247]
Npdc1	8.11	7.34	7.64	8.5	7.96	8.47	7.79	8.36	8.48	8.99	8.19	2.56	1e-06	2.73e-05	6.64	6.17	-2.83	0.00661	0.0408	-0.442	-1.36	neural proliferation, differentiation and control 1 [Source:MGI Symbol;Acc:MGI:1099802]
Cacybp	8.44	8.02	7.92	8.82	8.29	8.45	8.51	8.72	8.88	9.36	8.49	2.51	1e-06	2.73e-05	6.41	6.23	-0.614	0.542	0.698	-0.102	-1.07	calcyclin binding protein [Source:MGI Symbol;Acc:MGI:1270839]
Ndufa5	8.51	7.61	7.91	8.81	8.44	8.62	7.72	8.62	8.46	9.26	8.24	2.48	1e-06	2.73e-05	5.56	5.18	-0.808	0.423	0.601	-0.149	-1.11	NADH dehydrogenase (ubiquinone) 1 alpha subcomplex, 5 [Source:MGI Symbol;Acc:MGI:1915452]
Matr3	8.91	8.23	8.46	9.52	8.6	8.67	8.29	8.74	9.04	9.71	8.83	2.48	1e-06	2.73e-05	8.71	8.93	1.83	0.0734	0.189	0.326	1.25	matrin 3 [Source:MGI Symbol;Acc:MGI:1298379]
Ndufa6	8.61	8.49	8.58	8.76	8.94	8.97	8.38	8.88	9.15	9.46	8.61	2.46	1e-06	2.73e-05	3.7	3.18	-2.13	0.038	0.122	-0.703	-1.63	NADH dehydrogenase (ubiquinone) 1 alpha subcomplex, 6 (B14) [Source:MGI Symbol;Acc:MGI:1914380]
Sv2a	8.76	7.21	7.3	8.2	8.02	8.02	7.19	8.01	8.02	8.96	7.7	2.45	1e-06	2.73e-05	10.3	10.2	-0.423	0.674	0.796	-0.048	-1.03	synaptic vesicle glycoprotein 2 a [Source:MGI Symbol;Acc:MGI:1927139]
Nrxn3	7.54	7.24	7.36	8.25	7.98	8.05	7.53	7.89	7.95	8.53	7.28	2.44	1e-06	2.73e-05	8.17	8.1	0.263	0.793	0.876	0.0401	1.03	neurexin III [Source:MGI Symbol;Acc:MGI:1096389]
Dynlrb1	8.81	8.19	8.4	8.9	8.63	8.94	7.98	8.58	8.96	9.3	8.63	2.43	1e-06	2.73e-05	5.1	4.66	-2.39	0.0207	0.0833	-0.565	-1.48	dynein light chain roadblock-type 1 [Source:MGI Symbol;Acc:MGI:1914318]
Olfm1	7.86	7.21	7.45	8.49	8.04	8.26	7.43	8.15	8.38	8.76	7.87	2.42	1e-06	2.73e-05	7.72	7.58	-0.953	0.345	0.526	-0.221	-1.17	olfactomedin 1 [Source:MGI Symbol;Acc:MGI:1860437]
Ip6k2	8.09	7.44	7.74	8.46	8.16	8.27	7.64	8.15	8.48	8.74	8.42	2.39	1e-06	2.73e-05	3.63	2.96	-2.89	0.00558	0.0372	-0.862	-1.82	inositol hexaphosphate kinase 2 [Source:MGI Symbol;Acc:MGI:1923750]
Prkar1a	8.61	8.49	8.7	8.84	8.76	8.7	8.42	8.67	9.01	9.33	8.96	2.39	1e-06	2.73e-05	10.4	10.6	2.94	0.00486	0.0343	0.315	1.24	protein kinase, cAMP dependent regulatory, type I, alpha [Source:MGI Symbol;Acc:MGI:104878]
Tubb5	8.48	8.33	8.37	9.03	8.86	8.79	7.54	8.31	8.66	9.27	8.02	2.38	1e-06	2.73e-05	8.64	8.18	-3	0.00413	0.0314	-0.569	-1.48	tubulin, beta 5 class I [Source:MGI Symbol;Acc:MGI:107812]
Map9	7.65	7.25	7.3	8.14	8.06	8.11	7.91	8.06	8.23	8.68	8.22	2.35	1e-06	2.73e-05	7.42	7.73	2.81	0.00702	0.0424	0.362	1.28	microtubule-associated protein 9 [Source:MGI Symbol;Acc:MGI:2442208]
Stip1	8.5	7.55	7.91	8.73	8.25	8.36	8.4	8.54	8.54	9.12	8.14	2.34	1e-06	2.73e-05	7.17	6.88	-1.85	0.0695	0.182	-0.288	-1.22	stress-induced phosphoprotein 1 [Source:MGI Symbol;Acc:MGI:109130]
Syn2	7.63	7.22	7.41	8.49	8.01	8.09	7.39	8.01	7.96	8.71	7.32	2.34	1e-06	2.73e-05	8.73	8.64	-1.26	0.213	0.382	-0.126	-1.09	synapsin II [Source:MGI Symbol;Acc:MGI:103020]
Pnmal1	7.57	7.17	7.3	8.07	7.96	8	7.19	7.84	7.96	8.38	7.45	2.33	1e-06	2.73e-05	7.43	7.37	-0.211	0.834	0.903	-0.0415	-1.03	PNMA-like 1 [Source:MGI Symbol;Acc:MGI:1918941]
Prmt2	7.73	7.25	7.63	8.25	8.05	8.24	7.38	7.95	8.16	8.53	7.82	2.33	1e-06	2.73e-05	7.99	7.43	-2.46	0.0173	0.0743	-0.585	-1.5	protein arginine N-methyltransferase 2 [Source:MGI Symbol;Acc:MGI:1316652]
Rab6a	8.97	8.08	8	9.05	8.32	8.48	8.13	8.51	8.64	9.25	8.51	2.28	1e-06	2.73e-05	7.85	8.11	1.99	0.0524	0.151	0.306	1.24	RAB6A, member RAS oncogene family [Source:MGI Symbol;Acc:MGI:894313]
Hs6st2	7.57	7.17	7.41	8.18	7.98	8.02	7.17	7.84	7.9	8.43	7.46	2.27	1e-06	2.73e-05	7.41	7.69	2.01	0.0492	0.145	0.416	1.33	heparan sulfate 6-O-sulfotransferase 2 [Source:MGI Symbol;Acc:MGI:1354959]
Ppp1r9a	7.81	7.19	7.44	8.44	8.29	8.16	7.64	8.01	8.36	8.69	7.86	2.27	1e-06	2.73e-05	8.15	8.64	2.92	0.00512	0.0354	0.562	1.48	protein phosphatase 1, regulatory (inhibitor) subunit 9A [Source:MGI Symbol;Acc:MGI:2442401]
Necap1	7.69	7.3	7.52	8.18	8.11	8.13	7.3	7.89	8.02	8.39	7.44	2.24	1e-06	2.73e-05	7.04	6.95	-1.48	0.146	0.298	-0.18	-1.13	NECAP endocytosis associated 1 [Source:MGI Symbol;Acc:MGI:1914852]
Gdi1	8.37	7.55	8.09	8.39	8.14	8.28	7.67	8.23	8.34	8.8	8.1	2.2	1e-06	2.73e-05	9.85	9.63	-1.12	0.27	0.447	-0.0989	-1.07	guanosine diphosphate (GDP) dissociation inhibitor 1 [Source:MGI Symbol;Acc:MGI:99846]
Syngr3	7.54	7.21	7.3	8.08	7.99	8.05	7.16	7.84	7.9	8.4	7.35	2.19	1e-06	2.73e-05	6.73	6.44	-2.18	0.0341	0.113	-0.407	-1.33	synaptogyrin 3 [Source:MGI Symbol;Acc:MGI:1341881]
Atp6v0d1	8.52	7.46	7.93	8.62	8.5	8.44	7.63	8.42	8.39	8.95	8.28	2.18	1e-06	2.73e-05	7.84	7.78	-0.706	0.483	0.651	-0.0711	-1.05	ATPase, H+ transporting, lysosomal V0 subunit D1 [Source:MGI Symbol;Acc:MGI:1201778]
Alg2	7.78	7.35	7.51	8.37	8.09	8.19	7.36	8.15	8.39	8.67	7.8	2.17	1e-06	2.73e-05	8.44	8.4	-1.14	0.26	0.436	-0.146	-1.11	asparagine-linked glycosylation 2 (alpha-1,3-mannosyltransferase) [Source:MGI Symbol;Acc:MGI:1914731]
Spock3	7.92	7.21	7.36	8	8.01	8.05	7.17	7.84	7.9	8.36	7.73	2.17	1e-06	2.73e-05	6.83	7.09	2.06	0.0446	0.136	0.304	1.23	sparc/osteonectin, cwcv and kazal-like domains proteoglycan 3 [Source:MGI Symbol;Acc:MGI:1920152]
Tmem30a	8.91	8.17	8.25	8.64	8.36	8.52	7.81	8.61	8.6	9.2	8.61	2.16	1e-06	2.73e-05	8.99	9.43	3.23	0.00218	0.0221	0.459	1.37	transmembrane protein 30A [Source:MGI Symbol;Acc:MGI:106402]
Tcaf1	8	7.88	7.79	8.67	8.06	8.35	7.56	8.35	8.4	8.94	7.99	2.15	1e-06	2.73e-05	8.52	8.5	-0.506	0.615	0.754	-0.0464	-1.03	TRPM8 channel-associated factor 1 [Source:MGI Symbol;Acc:MGI:1914665]
2900011O08Rik	8.02	7.22	7.47	8.75	8.05	8	7.26	8.15	7.99	8.99	7.3	2.15	1e-06	2.73e-05	7.29	7.07	-1.26	0.215	0.383	-0.137	-1.1	RIKEN cDNA 2900011O08 gene [Source:MGI Symbol;Acc:MGI:1914504]
Cct7	8.54	7.94	7.98	8.71	8.37	8.45	8.46	8.46	8.6	8.99	8.36	2.14	1e-06	2.73e-05	7.06	6.65	-3.07	0.00343	0.0281	-0.476	-1.39	chaperonin containing Tcp1, subunit 7 (eta) [Source:MGI Symbol;Acc:MGI:107184]
Tusc3	7.77	7.38	7.52	8.29	8.02	8.38	8.06	8.49	8.57	9.04	8.6	2.13	1e-06	2.73e-05	6.81	6.48	-2.3	0.0258	0.0952	-0.326	-1.25	tumor suppressor candidate 3 [Source:MGI Symbol;Acc:MGI:1933134]
Tro	7.63	7.21	7.36	8.19	7.99	8.05	7.26	8.09	8.09	8.59	7.36	2.13	1e-06	2.73e-05	8.6	8.37	-1.2	0.236	0.409	-0.163	-1.12	trophinin [Source:MGI Symbol;Acc:MGI:1928994]
Serp2	7.62	7.28	7.57	8.21	8.03	8.03	7.17	7.89	7.97	8.43	7.34	2.1	1e-06	2.73e-05	5.11	4.26	-4.11	0.00014	0.00704	-0.921	-1.89	stress-associated endoplasmic reticulum protein family member 2 [Source:MGI Symbol;Acc:MGI:1919911]
Ckmt1	7.53	7.21	7.41	8.04	8	8.02	7.15	7.84	7.91	8.37	7.54	2.08	1e-06	2.73e-05	7.64	7.22	-2.28	0.027	0.0977	-0.509	-1.42	creatine kinase, mitochondrial 1, ubiquitous [Source:MGI Symbol;Acc:MGI:99441]
Hprt	7.61	8.3	7.74	8.08	8.47	8.24	7.68	7.84	8.2	8.76	7.76	2.08	1e-06	2.73e-05	7.86	8.05	1.25	0.217	0.386	0.157	1.12	hypoxanthine guanine phosphoribosyl transferase [Source:MGI Symbol;Acc:MGI:96217]
Cfdp1	8.39	8.09	8.26	8.71	8.4	8.57	8.34	8.33	8.81	8.96	8.36	2.07	1e-06	2.73e-05	5.53	5.01	-2.15	0.0365	0.119	-0.385	-1.31	craniofacial development protein 1 [Source:MGI Symbol;Acc:MGI:1344403]
Syp	7.56	7.21	7.36	8.03	7.99	8.02	7.14	7.92	7.95	8.44	7.77	2.05	1e-06	2.73e-05	9.34	8.91	-2.1	0.0406	0.128	-0.384	-1.31	synaptophysin [Source:MGI Symbol;Acc:MGI:98467]
Scn2a1	7.57	7.19	7.3	8.12	7.99	8.08	7.19	7.84	7.92	8.36	7.29	2.03	1e-06	2.73e-05	8.03	8.68	3.86	0.000312	0.00933	0.765	1.7	sodium channel, voltage-gated, type II, alpha 1 [Source:MGI Symbol;Acc:MGI:98248]
B630019K06Rik	7.65	7.21	7.55	8.05	8.01	8.07	7.18	7.95	7.98	8.46	7.34	2.02	1e-06	2.73e-05	6.98	6.49	-2.85	0.00627	0.0397	-0.551	-1.46	RIKEN cDNA B630019K06 gene [Source:MGI Symbol;Acc:MGI:2147918]
Hspd1	8.53	7.58	8.09	8.69	8.29	8.43	8.14	8.3	8.54	8.88	8.4	2.02	1e-06	2.73e-05	7.22	7.2	0.798	0.428	0.605	0.0899	1.06	heat shock protein 1 (chaperonin) [Source:MGI Symbol;Acc:MGI:96242]
Rasgrf1	7.53	7.17	7.3	8.12	7.99	8.03	7.24	7.95	7.93	8.47	7.29	2.01	1e-06	2.73e-05	9.61	9.46	-2.04	0.046	0.138	-0.223	-1.17	RAS protein-specific guanine nucleotide-releasing factor 1 [Source:MGI Symbol;Acc:MGI:99694]
Cltb	8.19	7.9	8.04	8.37	8.22	8.23	7.38	7.95	8.2	8.65	7.96	2.01	1e-06	2.73e-05	7.65	7.36	-2	0.0505	0.147	-0.191	-1.14	clathrin, light polypeptide (Lcb) [Source:MGI Symbol;Acc:MGI:1921575]

## Sheet: Astrocyte
Symbol	Oligodend.avg	EndothelialCells.avg	MuralCells.avg	NG.OPC.avg	PVMMicro.avg	Fibroblast.avg	Ependymocytes.avg	Astrocyte.avg	Tanycyte.avg	Neurons.avg	ParsTuber.avg	Astrocyte.min.t	Astrocyte.p	Astrocyte.FDR	HTM.Basal_3h.avg	HTM.Low_3h.avg	HTM_Low_3h.t	HTM_Low_3h.p	HTM_Low_3h.FDR	HTM_Low_3h.logFC	HTM_Low_3h.FC	Description
Agt	7.56	7.19	7.3	7.97	8	8.07	7.51	11.8	7.96	7.23	7.23	15	1e-06	7.6e-05	8.62	8.25	-0.726	0.471	0.643	-0.309	-1.24	angiotensinogen (serpin peptidase inhibitor, clade A, member 8) [Source:MGI Symbol;Acc:MGI:87963]
Slc4a4	7.61	7.21	7.36	8.11	8.07	8.09	8.04	12.1	8.48	7.25	7.34	14.5	1e-06	7.6e-05	8.33	8.88	3.51	0.000924	0.0145	0.566	1.48	solute carrier family 4 (anion exchanger), member 4 [Source:MGI Symbol;Acc:MGI:1927555]
Slc1a2	7.68	7.24	7.41	8.98	8.1	8.05	8.06	12.4	8.6	7.32	7.27	12.1	1e-06	7.6e-05	10.5	11.3	4.32	7.18e-05	0.00601	0.858	1.81	solute carrier family 1 (glial high affinity glutamate transporter), member 2 [Source:MGI Symbol;Acc:MGI:101931]
Slc6a11	7.56	7.19	7.3	8.05	7.96	8.03	7.49	10.7	8.17	7.3	7.25	11.2	1e-06	7.6e-05	9.59	9.67	0.0797	0.937	0.964	0.0167	1.01	solute carrier family 6 (neurotransmitter transporter, GABA), member 11 [Source:MGI Symbol;Acc:MGI:95630]
Ndrg2	7.97	7.22	7.66	9.28	8.44	8.53	9.08	12.4	9.28	7.56	7.66	10.7	1e-06	7.6e-05	10.9	10.8	-0.51	0.612	0.753	-0.0653	-1.05	N-myc downstream regulated gene 2 [Source:MGI Symbol;Acc:MGI:1352498]
Slc1a3	7.7	7.24	7.38	8.46	8.2	8.25	8.88	12.5	9.82	7.25	7.39	10.3	1e-06	7.6e-05	8.87	8.64	-2.36	0.0219	0.0861	-0.28	-1.21	solute carrier family 1 (glial high affinity glutamate transporter), member 3 [Source:MGI Symbol;Acc:MGI:99917]
Ntsr2	7.57	7.17	7.3	8.05	7.98	8.03	7.39	10.3	7.94	7.23	7.26	10	1e-06	7.6e-05	6.63	6.38	-2.3	0.0255	0.0945	-0.388	-1.31	neurotensin receptor 2 [Source:MGI Symbol;Acc:MGI:108018]
Acsbg1	7.56	7.17	7.3	7.98	7.99	8	7.29	10	7.95	7.22	7.21	9.52	1e-06	7.6e-05	7.67	7.67	0.465	0.644	0.776	0.0487	1.03	acyl-CoA synthetase bubblegum family member 1 [Source:MGI Symbol;Acc:MGI:2385656]
Pla2g7	7.56	7.17	7.3	8.19	8.13	8.38	7.67	10.5	8	7.33	8.14	8.99	1e-06	7.6e-05	7.72	7.7	-0.247	0.806	0.884	-0.0303	-1.02	phospholipase A2, group VII (platelet-activating factor acetylhydrolase, plasma) [Source:MGI Symbol;Acc:MGI:1351327]
2310022B05Rik	7.77	7.44	7.44	8.05	8.02	8.12	7.62	10.1	8.33	7.24	7.29	8.56	1e-06	7.6e-05	7.55	7.41	-0.765	0.448	0.622	-0.123	-1.09	RIKEN cDNA 2310022B05 gene [Source:MGI Symbol;Acc:MGI:1916801]
Itih3	7.94	7.19	7.3	7.97	7.98	8.03	7.55	9.94	7.9	7.23	7.21	8.53	1e-06	7.6e-05	8.89	8.55	-1.02	0.311	0.49	-0.325	-1.25	inter-alpha trypsin inhibitor, heavy chain 3 [Source:MGI Symbol;Acc:MGI:96620]
Atp1b2	7.57	7.19	7.84	8.52	7.99	8.46	8.28	10.7	8.74	7.52	7.9	7.99	1e-06	7.6e-05	9.49	9.76	1.83	0.0733	0.189	0.191	1.14	ATPase, Na+/K+ transporting, beta 2 polypeptide [Source:MGI Symbol;Acc:MGI:88109]
Atp1a2	7.88	7.7	8.92	9.58	8.09	10.3	8.21	12.8	9.25	7.31	7.31	7.85	1e-06	7.6e-05	10.5	10.4	-0.151	0.881	0.93	-0.0174	-1.01	ATPase, Na+/K+ transporting, alpha 2 polypeptide [Source:MGI Symbol;Acc:MGI:88106]
Sparcl1	7.87	11.1	10.6	8.65	8.3	10.8	11.1	14.1	8.7	7.9	7.44	7.33	1e-06	7.6e-05	10.8	10.8	-0.42	0.676	0.798	-0.0548	-1.04	SPARC-like 1 [Source:MGI Symbol;Acc:MGI:108110]
Scd1	7.91	7.19	7.3	8.02	7.98	8.1	7.28	9.5	8.03	7.24	7.37	6.83	1e-06	7.6e-05	8.45	8.91	3.44	0.00116	0.0164	0.498	1.41	stearoyl-Coenzyme A desaturase 1 [Source:MGI Symbol;Acc:MGI:98239]
Ednrb	7.63	7.32	8.62	9.51	8.15	8.02	7.83	11	8.04	7.23	7.64	6.66	1e-06	7.6e-05	5.73	6.11	1.58	0.119	0.261	0.354	1.28	endothelin receptor type B [Source:MGI Symbol;Acc:MGI:102720]
Ppap2b	8.37	7.37	9.65	8.87	7.98	9.7	8.63	11.9	9.03	7.31	8.03	6.66	1e-06	7.6e-05	7.94	7.92	0.415	0.68	0.8	0.0428	1.03	phosphatidic acid phosphatase type 2B [Source:MGI Symbol;Acc:MGI:1915166]
Igsf1	7.54	7.19	7.41	7.99	7.99	8.02	7.63	9.67	8.01	7.82	7.3	6.6	1e-06	7.6e-05	6.65	6.36	-0.731	0.468	0.64	-0.225	-1.17	immunoglobulin superfamily, member 1 [Source:MGI Symbol;Acc:MGI:2147913]
Kcnj10	8.81	7.19	7.3	8.75	8.1	8	8.7	10.2	8.09	7.22	7.24	6.58	1e-06	7.6e-05	8.23	8.5	1.65	0.106	0.241	0.199	1.15	potassium inwardly-rectifying channel, subfamily J, member 10 [Source:MGI Symbol;Acc:MGI:1194504]
Mmd2	7.99	7.19	7.36	8.86	8.01	8.02	7.89	10.4	8.59	7.38	7.26	6.53	1e-06	7.6e-05	6.6	6.39	-2.08	0.0423	0.131	-0.206	-1.15	monocyte to macrophage differentiation-associated 2 [Source:MGI Symbol;Acc:MGI:1922354]
Glud1	8.03	7.7	8.07	8.61	8.43	8.37	7.83	10.2	8.25	7.85	7.66	6.5	1e-06	7.6e-05	8.34	8.43	1	0.32	0.5	0.0902	1.06	glutamate dehydrogenase 1 [Source:MGI Symbol;Acc:MGI:95753]
Cpe	8.2	8.02	7.9	9.59	8.25	8.9	9.82	12.1	10.3	9.51	9.58	6.26	1e-06	7.6e-05	11.2	11.4	1.56	0.124	0.267	0.226	1.17	carboxypeptidase E [Source:MGI Symbol;Acc:MGI:101932]
Acsl6	7.56	7.17	7.36	8.15	7.98	8.03	7.8	9.72	8.34	7.55	7.28	6.23	1e-06	7.6e-05	7.43	7.65	1.91	0.0613	0.167	0.147	1.11	acyl-CoA synthetase long-chain family member 6 [Source:MGI Symbol;Acc:MGI:894291]
Gria1	7.57	7.21	7.3	8.11	7.98	8.04	7.35	9.6	8.16	8.36	7.26	6.03	1e-06	7.6e-05	9.07	8.81	-1.66	0.103	0.237	-0.21	-1.16	glutamate receptor, ionotropic, AMPA1 (alpha 1) [Source:MGI Symbol;Acc:MGI:95808]
Slc7a10	7.55	7.17	7.3	8.01	7.98	8.02	7.14	9.11	7.95	7.22	7.22	5.94	1e-06	7.6e-05	5.03	5.14	0.581	0.564	0.715	0.1	1.07	solute carrier family 7 (cationic amino acid transporter, y+ system), member 10 [Source:MGI Symbol;Acc:MGI:1858261]
Gpld1	7.6	7.2	7.41	8.12	7.98	8.11	8.17	9.48	8.05	7.45	7.37	5.8	1e-06	7.6e-05	7.84	7.68	-0.887	0.379	0.558	-0.149	-1.11	glycosylphosphatidylinositol specific phospholipase D1 [Source:MGI Symbol;Acc:MGI:106604]
Glul	9.31	9.35	8.94	8.33	9.92	9.43	7.79	11.5	9.15	7.57	8.29	5.77	1e-06	7.6e-05	10.7	10.7	-1.22	0.227	0.4	-0.114	-1.08	glutamate-ammonia ligase (glutamine synthetase) [Source:MGI Symbol;Acc:MGI:95739]
Ttyh1	9.17	7.19	7.44	9.49	8.18	8.12	8.73	11.7	10.2	7.52	7.39	5.76	1e-06	7.6e-05	9	8.82	-2.41	0.0195	0.0803	-0.261	-1.2	tweety homolog 1 (Drosophila) [Source:MGI Symbol;Acc:MGI:1889007]
Aqp4	7.54	7.17	7.3	7.96	7.99	8	9.45	10.7	8.16	7.23	7.44	5.68	1e-06	7.6e-05	5.95	6.81	4.54	3.33e-05	0.00553	0.801	1.74	aquaporin 4 [Source:MGI Symbol;Acc:MGI:107387]
Gabbr2	7.54	7.17	7.3	8.11	7.96	8.02	7.13	9.17	7.98	7.5	7.23	5.68	1e-06	7.6e-05	8.06	8.25	0.916	0.364	0.544	0.123	1.09	gamma-aminobutyric acid (GABA) B receptor, 2 [Source:MGI Symbol;Acc:MGI:2386030]
Ahcyl1	8	7.79	7.36	8.27	8.18	8.33	7.67	9.53	8.17	7.67	7.62	5.67	1e-06	7.6e-05	8.6	8.96	3.32	0.00165	0.0193	0.341	1.27	S-adenosylhomocysteine hydrolase-like 1 [Source:MGI Symbol;Acc:MGI:2385184]
Npas3	7.58	7.17	7.36	8.34	7.98	8	7.87	9.34	8.11	7.24	7.24	5.35	1e-06	7.6e-05	5.48	5.65	2.25	0.0286	0.102	0.402	1.32	neuronal PAS domain protein 3 [Source:MGI Symbol;Acc:MGI:1351610]
Pfkm	7.64	7.4	7.47	8.32	7.99	8.1	7.74	9.43	8.37	7.92	7.45	5.34	1e-06	7.6e-05	9.07	8.84	-1.95	0.0566	0.159	-0.292	-1.22	phosphofructokinase, muscle [Source:MGI Symbol;Acc:MGI:97548]
Abhd3	7.99	7.17	7.3	8.09	7.99	8.06	7.64	9.11	8.01	7.3	7.25	5.27	1e-06	7.6e-05	6.1	6.28	0.971	0.336	0.516	0.134	1.1	abhydrolase domain containing 3 [Source:MGI Symbol;Acc:MGI:2147183]
Acsl3	9.14	7.87	7.6	8.61	8.1	8.25	8.54	10.4	8.75	8.1	8.79	5.04	1e-06	7.6e-05	8.26	8.41	2.28	0.0268	0.0973	0.224	1.17	acyl-CoA synthetase long-chain family member 3 [Source:MGI Symbol;Acc:MGI:1921455]
Nkain4	7.6	7.21	7.47	8.31	7.99	8.28	8.39	10.1	9.06	7.31	7.27	4.89	1e-06	7.6e-05	4.57	4.23	-1.29	0.203	0.371	-0.306	-1.24	Na+/K+ transporting ATPase interacting 4 [Source:MGI Symbol;Acc:MGI:1915372]
Aldh1l1	7.53	7.17	7.3	7.97	7.96	8.03	7.16	8.94	7.92	7.23	7.23	4.84	1e-06	7.6e-05	6.46	6.26	-0.952	0.346	0.526	-0.147	-1.11	aldehyde dehydrogenase 1 family, member L1 [Source:MGI Symbol;Acc:MGI:1340024]
Gna13	7.72	7.52	7.63	8.19	8.46	8.27	7.54	9.49	8.19	7.41	7.75	4.77	1e-06	7.6e-05	6.47	6.96	3.56	0.000793	0.0135	0.464	1.38	guanine nucleotide binding protein, alpha 13 [Source:MGI Symbol;Acc:MGI:95768]
Tmem229a	8.03	7.17	7.3	8.09	7.98	8.02	7.26	8.84	7.91	7.27	7.3	4.72	1e-06	7.6e-05	6.48	7.2	4.09	0.000153	0.00736	0.806	1.75	transmembrane protein 229A [Source:MGI Symbol;Acc:MGI:2442812]
F3	7.53	7.17	7.3	8.41	7.98	8.57	7.51	9.5	8.31	7.24	7.64	4.69	1e-06	7.6e-05	6.77	6.68	-0.603	0.549	0.704	-0.0646	-1.05	coagulation factor III [Source:MGI Symbol;Acc:MGI:88381]
Slc6a1	7.84	7.19	7.3	8.56	7.99	8.02	7.47	9.49	8.05	7.48	7.27	4.62	1e-06	7.6e-05	9.76	10.1	1.87	0.0673	0.178	0.258	1.2	solute carrier family 6 (neurotransmitter transporter, GABA), member 1 [Source:MGI Symbol;Acc:MGI:95627]
Apoe	8.81	9.39	9.3	11	12.7	11.2	12.9	15	13.6	7.63	8.53	4.58	1e-06	7.6e-05	8.6	7.8	-2.69	0.00948	0.051	-0.975	-1.97	apolipoprotein E [Source:MGI Symbol;Acc:MGI:88057]
Fam213a	8.04	7.37	7.41	8.47	8.11	8.2	9.55	10.8	8.63	8.12	8.2	4.57	1e-06	7.6e-05	6.59	6.26	-1.9	0.0635	0.171	-0.304	-1.23	family with sequence similarity 213, member A [Source:MGI Symbol;Acc:MGI:1917814]
Etnppl	7.52	7.17	7.3	7.96	7.96	8	7.81	8.75	7.94	7.22	7.21	4.41	1e-06	7.6e-05	7.21	7.27	0.534	0.596	0.74	0.0862	1.06	ethanolamine phosphate phospholyase [Source:MGI Symbol;Acc:MGI:1919010]
Elovl5	8.11	7.7	8.09	8.46	8.04	8.08	7.6	9.33	8.18	7.65	7.51	4.38	1e-06	7.6e-05	6.5	6.86	2.08	0.043	0.132	0.296	1.23	ELOVL family member 5, elongation of long chain fatty acids (yeast) [Source:MGI Symbol;Acc:MGI:1916051]
Cyp2j9	7.66	7.21	7.3	8.15	7.96	8.08	7.21	8.98	7.96	7.22	7.38	4.36	1e-06	7.6e-05	5.75	5.66	-0.666	0.509	0.672	-0.121	-1.09	cytochrome P450, family 2, subfamily j, polypeptide 9 [Source:MGI Symbol;Acc:MGI:1921769]
Htra1	7.7	7.74	7.66	8.28	7.96	8.56	7.97	9.41	8.17	7.23	7.28	4.35	1e-06	7.6e-05	7.31	7.13	-1.35	0.181	0.344	-0.253	-1.19	HtrA serine peptidase 1 [Source:MGI Symbol;Acc:MGI:1929076]
Scg3	7.96	7.19	7.3	8.83	8.12	8.07	8.97	10.7	8.44	9.41	9.54	4.31	1e-06	7.6e-05	8.23	7.98	-1.36	0.179	0.341	-0.18	-1.13	secretogranin III [Source:MGI Symbol;Acc:MGI:103032]
Gfap	7.55	7.19	7.3	7.96	7.99	8.03	7.47	8.92	7.96	7.22	7.23	4.29	1e-06	7.6e-05	6.53	6.39	-1.46	0.15	0.303	-0.367	-1.29	glial fibrillary acidic protein [Source:MGI Symbol;Acc:MGI:95697]
Aldoc	7.85	7.28	7.55	9.27	8.19	8.13	8.32	12.7	11.4	8.24	8.38	4.22	1e-06	7.6e-05	10.3	10.1	-2.03	0.0478	0.142	-0.266	-1.2	aldolase C, fructose-bisphosphate [Source:MGI Symbol;Acc:MGI:101863]
Slc25a18	7.52	7.17	7.3	7.99	7.99	8.02	8.28	8.98	8.03	7.22	7.23	4.22	1e-06	7.6e-05	6.7	6.6	0.029	0.977	0.988	0.00559	1	solute carrier family 25 (mitochondrial carrier), member 18 [Source:MGI Symbol;Acc:MGI:1919053]
Lxn	7.56	7.48	7.46	8.04	8.05	8.22	7.68	9.09	8.03	7.46	7.43	4.06	1e-06	7.6e-05	3.46	3.2	-1.44	0.156	0.311	-0.304	-1.23	latexin [Source:MGI Symbol;Acc:MGI:107633]
Fgfr3	7.52	7.17	7.41	8.05	7.96	8.02	7.4	8.74	7.94	7.22	7.22	4.02	1e-06	7.6e-05	8.15	8.06	-2.21	0.0315	0.108	-0.269	-1.2	fibroblast growth factor receptor 3 [Source:MGI Symbol;Acc:MGI:95524]
Tril	7.81	7.61	7.6	8.7	7.98	8.26	7.29	9.41	7.95	7.23	7.41	4.01	1e-06	7.6e-05	6.06	6.12	0.411	0.683	0.802	0.0439	1.03	TLR4 interactor with leucine-rich repeats [Source:MGI Symbol;Acc:MGI:1914123]
Rasa2	7.64	7.25	7.6	8.13	8.04	8.17	7.32	8.89	8.13	7.42	7.52	4.01	1e-06	7.6e-05	5.29	5.52	1.61	0.113	0.251	0.249	1.19	RAS p21 protein activator 2 [Source:MGI Symbol;Acc:MGI:2149960]
Lrig1	7.55	7.21	7.36	7.98	7.96	8.12	7.36	8.91	8.07	7.24	7.41	4	1e-06	7.6e-05	6.52	6.52	-0.805	0.424	0.602	-0.128	-1.09	leucine-rich repeats and immunoglobulin-like domains 1 [Source:MGI Symbol;Acc:MGI:107935]
Mt1	9.61	8.65	7.75	8.82	8.99	8.92	11.9	13	11.8	7.57	9.73	3.98	1e-06	7.6e-05	8.14	7.64	-1.62	0.112	0.251	-0.599	-1.51	metallothionein 1 [Source:MGI Symbol;Acc:MGI:97171]
Adcyap1r1	7.67	7.17	7.44	8.37	8	8.07	7.28	9.17	7.91	7.73	7.27	3.92	1e-06	7.6e-05	8.85	8.63	-2.51	0.0151	0.0679	-0.278	-1.21	adenylate cyclase activating polypeptide 1 receptor 1 [Source:MGI Symbol;Acc:MGI:108449]
Sash1	8.01	7.82	7.83	8.45	8.11	8.35	8.11	9.12	8.06	7.33	7.29	3.88	1e-06	7.6e-05	7.26	7.48	1.55	0.126	0.271	0.192	1.14	SAM and SH3 domain containing 1 [Source:MGI Symbol;Acc:MGI:1917347]
Mpp6	7.58	7.29	7.44	8.23	8.08	8.25	7.57	9.04	7.99	7.39	7.33	3.87	1e-06	7.6e-05	5.22	5.28	0.347	0.73	0.836	0.0526	1.04	membrane protein, palmitoylated 6 (MAGUK p55 subfamily member 6) [Source:MGI Symbol;Acc:MGI:1927340]
Gpd2	7.68	8.27	7.61	8.06	7.99	8.08	7.29	9.06	8.19	7.6	7.6	3.83	1e-06	7.6e-05	6.8	7.02	1.82	0.0739	0.19	0.203	1.15	glycerol phosphate dehydrogenase 2, mitochondrial [Source:MGI Symbol;Acc:MGI:99778]
Gpr37l1	8.56	7.17	7.36	9.6	7.96	8	8.9	10.4	8.15	7.23	7.24	3.79	1e-06	7.6e-05	7.95	8.07	0.905	0.369	0.55	0.123	1.09	G protein-coupled receptor 37-like 1 [Source:MGI Symbol;Acc:MGI:1928503]
Agpat5	8.01	7.34	7.55	8.71	8.09	8.21	7.57	9.45	8.14	7.58	7.5	3.77	1e-06	7.6e-05	6.03	6.34	3.04	0.00372	0.0295	0.337	1.26	1-acylglycerol-3-phosphate O-acyltransferase 5 (lysophosphatidic acid acyltransferase, epsilon) [Source:MGI Symbol;Acc:MGI:1196345]
Scd2	11.5	7.75	7.78	9.82	8.24	8.64	10.2	12.5	10	8.22	8.5	3.7	1e-06	7.6e-05	10.9	11.2	2.07	0.0433	0.133	0.224	1.17	stearoyl-Coenzyme A desaturase 2 [Source:MGI Symbol;Acc:MGI:98240]
Abat	7.98	7.17	7.36	8.2	8.05	8.13	7.96	9.54	8.73	8.25	7.46	3.67	1e-06	7.6e-05	9.14	9.17	-0.768	0.446	0.621	-0.0828	-1.06	4-aminobutyrate aminotransferase [Source:MGI Symbol;Acc:MGI:2443582]
Slc39a12	7.54	7.17	7.36	7.97	7.98	8	7.79	8.96	8.34	7.23	7.36	3.63	1e-06	7.6e-05	6.24	6.42	0.94	0.352	0.532	0.144	1.1	solute carrier family 39 (zinc transporter), member 12 [Source:MGI Symbol;Acc:MGI:2139274]
Ldhb	7.86	7.28	7.6	8.97	9.5	8.51	7.88	10.4	9.14	8.95	8.85	3.61	1e-06	7.6e-05	8.93	8.95	0.606	0.547	0.703	0.0826	1.06	lactate dehydrogenase B [Source:MGI Symbol;Acc:MGI:96763]
Eva1a	7.52	7.27	7.3	7.97	8	8	7.36	8.59	8.1	7.22	7.22	3.56	1e-06	7.6e-05	3.12	3.29	0.502	0.618	0.757	0.0984	1.07	eva-1 homolog A (C. elegans) [Source:MGI Symbol;Acc:MGI:2385247]
Itpkb	7.53	7.55	8.02	8	8.05	8.05	8.08	8.85	7.99	7.25	7.3	3.54	1e-06	7.6e-05	6.7	6.66	-0.544	0.589	0.735	-0.0891	-1.06	inositol 1,4,5-trisphosphate 3-kinase B [Source:MGI Symbol;Acc:MGI:109235]
Gja1	7.58	7.89	7.87	8	7.99	8.37	9.9	10.6	9.72	7.24	7.46	3.53	1e-06	7.6e-05	7.79	8	1.52	0.135	0.282	0.167	1.12	gap junction protein, alpha 1 [Source:MGI Symbol;Acc:MGI:95713]
Trim9	7.53	7.17	7.36	8.09	7.96	8	7.31	8.77	8.05	7.46	7.38	3.53	1e-06	7.6e-05	7.27	7.31	0.108	0.914	0.951	0.0155	1.01	tripartite motif-containing 9 [Source:MGI Symbol;Acc:MGI:2137354]
Tuba4a	7.6	7.19	7.3	8.01	8.06	8.02	7.19	8.76	7.98	8.31	7.87	3.53	1e-06	7.6e-05	7.21	6.91	-2.13	0.0377	0.122	-0.514	-1.43	tubulin, alpha 4A [Source:MGI Symbol;Acc:MGI:1095410]
Enho	7.58	7.24	7.3	8.14	7.98	8.1	7.38	9.12	8.48	7.38	7.29	3.51	1e-06	7.6e-05	5.21	4.73	-2.33	0.0238	0.0905	-0.618	-1.54	energy homeostasis associated [Source:MGI Symbol;Acc:MGI:1916888]
Npepps	8.28	7.29	7.56	8.39	8.32	8.27	7.82	9.04	8.38	8.25	8.3	3.5	1e-06	7.6e-05	7.74	7.9	1.32	0.191	0.355	0.153	1.11	aminopeptidase puromycin sensitive [Source:MGI Symbol;Acc:MGI:1101358]
Agpat3	7.92	7.49	7.76	8.25	8.21	8.15	7.67	8.92	8.13	7.56	7.5	3.47	1e-06	7.6e-05	8.24	8.21	-1.25	0.217	0.387	-0.109	-1.08	1-acylglycerol-3-phosphate O-acyltransferase 3 [Source:MGI Symbol;Acc:MGI:1336186]
Dlgap1	7.79	7.19	7.3	8.35	7.98	8.02	7.29	8.96	7.97	7.64	7.25	3.47	1e-06	7.6e-05	6.9	6.97	0.274	0.785	0.871	0.057	1.04	discs, large (Drosophila) homolog-associated protein 1 [Source:MGI Symbol;Acc:MGI:1346065]
Kcnj16	7.64	7.17	7.3	8.36	7.98	8.02	7.9	8.97	8	7.24	7.25	3.41	1e-06	7.6e-05	5.35	5.77	2.22	0.0309	0.107	0.417	1.33	potassium inwardly-rectifying channel, subfamily J, member 16 [Source:MGI Symbol;Acc:MGI:1314842]
Timp4	8.01	7.19	7.3	8.33	7.99	8	7.97	8.9	7.99	7.22	7.5	3.37	1e-06	7.6e-05	5.67	5.37	-1.81	0.0766	0.195	-0.321	-1.25	tissue inhibitor of metalloproteinase 4 [Source:MGI Symbol;Acc:MGI:109125]
Paqr8	7.81	7.29	7.3	8.02	7.96	8.02	7.17	8.71	7.96	7.27	7.29	3.37	1e-06	7.6e-05	8.17	8.6	3.41	0.00126	0.017	0.426	1.34	progestin and adipoQ receptor family member VIII [Source:MGI Symbol;Acc:MGI:1921479]
Echdc1	7.75	7.33	7.47	8.13	8.01	8.08	7.68	8.7	8.16	7.4	7.58	3.37	1e-06	7.6e-05	3.2	3.47	1.28	0.208	0.375	0.255	1.19	enoyl Coenzyme A hydratase domain containing 1 [Source:MGI Symbol;Acc:MGI:1277169]
Lfng	7.54	7.4	7.41	8	8.21	8.05	7.46	8.81	8.06	7.22	7.24	3.3	1e-06	7.6e-05	5.55	5.13	-3.23	0.00218	0.0221	-0.52	-1.43	LFNG O-fucosylpeptide 3-beta-N-acetylglucosaminyltransferase [Source:MGI Symbol;Acc:MGI:1095413]
S1pr1	7.53	8.93	8.54	7.97	8.02	8.05	7.47	9.54	8.3	7.22	7.21	3.29	1e-06	7.6e-05	6.09	6.19	0.448	0.656	0.785	0.0482	1.03	sphingosine-1-phosphate receptor 1 [Source:MGI Symbol;Acc:MGI:1096355]
Slc1a4	7.53	7.21	7.3	8.05	7.98	8.04	7.71	8.66	8.01	7.5	7.37	3.27	1e-06	7.6e-05	6.9	6.71	-2.37	0.0215	0.0851	-0.252	-1.19	solute carrier family 1 (glutamate/neutral amino acid transporter), member 4 [Source:MGI Symbol;Acc:MGI:2135601]
Hacd3	8.02	7.39	7.41	8.47	8.13	8.26	7.6	9.1	8.25	8.49	7.7	3.26	1e-06	7.6e-05	8.01	8	-0.31	0.758	0.853	-0.0257	-1.02	3-hydroxyacyl-CoA dehydratase 3 [Source:MGI Symbol;Acc:MGI:1889341]
Acss1	7.55	7.17	7.36	8.06	8.05	8	7.37	8.58	8	7.23	7.21	3.19	1e-06	7.6e-05	5.16	5.23	0.526	0.601	0.744	0.0579	1.04	acyl-CoA synthetase short-chain family member 1 [Source:MGI Symbol;Acc:MGI:1915988]
Fgf1	7.8	7.17	7.44	7.96	7.99	8	7.5	8.61	8.01	7.32	7.43	3.13	1e-06	7.6e-05	6.63	6.66	-0.12	0.905	0.946	-0.015	-1.01	fibroblast growth factor 1 [Source:MGI Symbol;Acc:MGI:95515]
Id2	7.56	7.5	8.86	8.75	8.93	8.7	7.61	9.85	8.08	7.41	8.39	3.11	1e-06	7.6e-05	6.3	6.45	0.69	0.493	0.659	0.133	1.1	inhibitor of DNA binding 2 [Source:MGI Symbol;Acc:MGI:96397]
Dbx2	7.59	7.17	7.3	8.18	7.96	8	7.13	8.64	7.89	7.23	7.22	3.1	1e-06	7.6e-05	3.29	3.02	-1.11	0.27	0.447	-0.225	-1.17	developing brain homeobox 2 [Source:MGI Symbol;Acc:MGI:107445]
Adk	7.93	7.29	7.52	8.16	8.01	8.19	7.3	8.71	8.03	7.44	7.58	3.09	1e-06	7.6e-05	6.08	6.29	1.95	0.057	0.16	0.239	1.18	adenosine kinase [Source:MGI Symbol;Acc:MGI:87930]
Ckb	10.6	7.6	8.61	11.4	9.35	8.95	10.8	12.2	9.93	9.28	9.13	3.08	1e-06	7.6e-05	9.65	9.38	-1.55	0.127	0.272	-0.424	-1.34	creatine kinase, brain [Source:MGI Symbol;Acc:MGI:88407]
Mlc1	7.59	7.21	7.51	7.99	8.04	8.03	10.1	10.8	9.82	7.24	7.35	3.07	1e-06	7.6e-05	7.55	7.3	-1.85	0.0695	0.182	-0.214	-1.16	megalencephalic leukoencephalopathy with subcortical cysts 1 homolog (human) [Source:MGI Symbol;Acc:MGI:2157910]
Asrgl1	9.18	7.35	7.44	9.63	8.08	8.1	8.07	10.3	8.34	7.61	7.48	3.07	1e-06	7.6e-05	8.07	8.11	0.951	0.346	0.526	0.12	1.09	asparaginase like 1 [Source:MGI Symbol;Acc:MGI:1913764]
Sfrp5	7.53	7.17	7.3	7.97	7.96	8	7.89	8.43	7.97	7.22	7.42	3.07	1e-06	7.6e-05	3.61	3.16	-1.66	0.103	0.237	-0.605	-1.52	secreted frizzled-related sequence protein 5 [Source:MGI Symbol;Acc:MGI:1860298]
Hrsp12	7.78	7.26	7.47	8.06	8.07	8.13	7.39	8.83	8.27	7.4	7.62	3.07	1e-06	7.6e-05	4.76	4.49	-1.38	0.174	0.335	-0.212	-1.16	heat-responsive protein 12 [Source:MGI Symbol;Acc:MGI:1095401]
Ptch1	7.62	7.26	7.3	8.08	7.98	8.14	7.42	8.78	8.2	7.27	7.54	3.05	1e-06	7.6e-05	7.42	7.56	0.727	0.47	0.642	0.124	1.09	patched homolog 1 [Source:MGI Symbol;Acc:MGI:105373]
Phgdh	8.22	7.19	7.3	8.1	8.1	8.03	7.38	8.73	8.07	7.22	7.38	3.03	1e-06	7.6e-05	5.61	5.55	-0.393	0.696	0.812	-0.0712	-1.05	3-phosphoglycerate dehydrogenase [Source:MGI Symbol;Acc:MGI:1355330]
Myo6	8.76	7.93	8.29	8.23	8.1	8.39	7.97	9.32	8.42	7.29	8.06	3.02	1e-06	7.6e-05	6.79	7.38	4.31	7.26e-05	0.00601	0.627	1.54	myosin VI [Source:MGI Symbol;Acc:MGI:104785]
Fads1	7.85	7.26	7.47	8.22	8.02	8.08	7.64	8.67	8.17	7.36	7.4	3.02	1e-06	7.6e-05	7.88	7.96	0.499	0.62	0.757	0.0489	1.03	fatty acid desaturase 1 [Source:MGI Symbol;Acc:MGI:1923517]
Ntm	7.63	7.2	7.52	8.57	8.02	8.2	7.25	9.2	7.94	8.12	7.56	3.02	1e-06	7.6e-05	7.49	7.33	0.575	0.568	0.719	0.0879	1.06	neurotrimin [Source:MGI Symbol;Acc:MGI:2446259]
Spon1	7.65	7.21	7.44	8.6	7.99	8.51	7.49	9.3	8.78	7.36	7.23	3	1e-06	7.6e-05	8.01	7.84	-1.9	0.0633	0.171	-0.192	-1.14	spondin 1, (f-spondin) extracellular matrix protein [Source:MGI Symbol;Acc:MGI:2385287]
Me1	7.7	7.21	7.3	8.22	7.96	8.05	7.2	8.7	8.04	7.39	7.34	3	1e-06	7.6e-05	5.84	5.85	-0.073	0.942	0.968	-0.0102	-1.01	malic enzyme 1, NADP(+)-dependent, cytosolic [Source:MGI Symbol;Acc:MGI:97043]
Ddt	7.76	7.35	7.41	8.25	8.09	8.25	7.7	8.92	8.43	7.67	7.63	2.98	1e-06	7.6e-05	3.99	3.68	-1.72	0.0915	0.219	-0.628	-1.55	D-dopachrome tautomerase [Source:MGI Symbol;Acc:MGI:1298381]
Adgrb1	7.66	7.19	7.36	8.07	7.98	8.02	7.4	8.51	8.02	7.47	7.24	2.97	1e-06	7.6e-05	8.32	7.86	-3.1	0.00314	0.0269	-0.578	-1.49	adhesion G protein-coupled receptor B1 [Source:MGI Symbol;Acc:MGI:1933736]
Kcne1l	7.54	7.17	7.3	7.97	7.98	8.02	7.3	8.54	8.16	7.26	7.37	2.95	1e-06	7.6e-05	2.59	1.77	-3.5	0.000954	0.0147	-1.06	-2.09	potassium voltage-gated channel, Isk-related family, member 1-like, pseudogene [Source:MGI Symbol;Acc:MGI:1913490]
Fam107a	7.54	7.69	7.67	7.99	7.96	8	7.48	9.03	8.52	7.47	7.34	2.93	1e-06	7.6e-05	8.99	8.84	-1.41	0.165	0.322	-0.223	-1.17	family with sequence similarity 107, member A [Source:MGI Symbol;Acc:MGI:3041256]
Arhgef26	7.54	7.17	7.3	8.11	7.98	8.02	7.46	8.53	8.02	7.23	7.33	2.93	1e-06	7.6e-05	4.47	4.75	1.27	0.211	0.379	0.208	1.16	Rho guanine nucleotide exchange factor (GEF) 26 [Source:MGI Symbol;Acc:MGI:1918053]
Mid1ip1	8.31	7.37	7.65	8.47	8.44	8.35	9.14	9.82	9.04	7.74	7.89	2.88	1e-06	7.6e-05	5.63	5.64	0.2	0.842	0.908	0.0318	1.02	Mid1 interacting protein 1 (gastrulation specific G12-like (zebrafish)) [Source:MGI Symbol;Acc:MGI:1915291]
Sfxn5	7.62	7.19	7.36	8.1	8.03	8.02	7.89	8.85	8.42	7.28	7.27	2.88	1e-06	7.6e-05	7.43	7.36	-0.759	0.451	0.625	-0.0814	-1.06	sideroflexin 5 [Source:MGI Symbol;Acc:MGI:2137681]
Flrt1	7.66	7.17	7.3	8.25	7.96	8.08	7.39	8.64	8.04	7.36	7.34	2.88	1e-06	7.6e-05	5.04	5.05	0.484	0.631	0.767	0.0818	1.06	fibronectin leucine rich transmembrane protein 1 [Source:MGI Symbol;Acc:MGI:3026647]
Gmpr	7.56	7.35	7.3	8.07	8.15	8	7.37	8.68	7.97	7.48	7.31	2.87	1e-06	7.6e-05	4.91	4.63	-1.73	0.0887	0.215	-0.329	-1.26	guanosine monophosphate reductase [Source:MGI Symbol;Acc:MGI:1913605]
Ncan	7.52	7.17	7.3	8.29	7.99	8.02	7.27	8.77	7.9	7.29	7.21	2.86	1e-06	7.6e-05	6.29	6.32	0.0335	0.973	0.987	0.00514	1	neurocan [Source:MGI Symbol;Acc:MGI:104694]
Phlpp1	8.1	7.22	7.41	8.11	7.96	8.02	7.28	8.54	8.08	7.27	7.33	2.85	1e-06	7.6e-05	7.08	7.25	0.69	0.493	0.659	0.0695	1.05	PH domain and leucine rich repeat protein phosphatase 1 [Source:MGI Symbol;Acc:MGI:2138327]
Aldh6a1	7.79	7.31	7.3	8.06	8.14	8.13	7.36	8.68	8.09	7.33	7.48	2.85	1e-06	7.6e-05	6.79	7.39	3.89	0.000286	0.0091	0.699	1.62	aldehyde dehydrogenase family 6, subfamily A1 [Source:MGI Symbol;Acc:MGI:1915077]
Rnf215	7.59	7.48	7.47	8.01	7.98	8.11	7.29	8.57	8.12	7.4	7.33	2.83	1e-06	7.6e-05	5.24	4.73	-3.71	0.000505	0.0111	-0.676	-1.6	ring finger protein 215 [Source:MGI Symbol;Acc:MGI:1918923]
Mut	7.77	7.42	7.71	8.08	8.05	8.2	7.53	8.65	8.16	7.47	7.62	2.79	1e-06	7.6e-05	5.76	5.96	1.83	0.0738	0.19	0.29	1.22	methylmalonyl-Coenzyme A mutase [Source:MGI Symbol;Acc:MGI:97239]
Eps15	8.37	7.44	7.6	8	8.3	8.24	7.5	8.78	8.18	7.56	7.57	2.74	1e-06	7.6e-05	7.39	7.85	3.32	0.00166	0.0193	0.455	1.37	epidermal growth factor receptor pathway substrate 15 [Source:MGI Symbol;Acc:MGI:104583]
AW047730	7.54	7.17	7.3	8.52	7.99	8.02	7.16	8.83	7.96	7.22	7.22	2.72	1e-06	7.6e-05	3.47	3.01	-2.04	0.0464	0.139	-0.48	-1.39	expressed sequence AW047730 [Source:MGI Symbol;Acc:MGI:2139951]
Slc9a3r1	7.54	7.26	7.36	7.97	8.15	8.09	7.63	8.54	8.14	7.22	7.47	2.71	1e-06	7.6e-05	4.19	4	-1.61	0.113	0.252	-0.344	-1.27	solute carrier family 9 (sodium/hydrogen exchanger), member 3 regulator 1 [Source:MGI Symbol;Acc:MGI:1349482]
Btbd17	7.54	7.17	7.36	8.06	7.96	8.02	7.16	8.4	8.04	7.28	7.22	2.67	1e-06	7.6e-05	3.17	3	-1.68	0.0993	0.231	-0.514	-1.43	BTB (POZ) domain containing 17 [Source:MGI Symbol;Acc:MGI:1919264]
Sparc	8.53	12.1	11.4	8.73	11.5	12.6	11.8	13.5	10.2	7.33	7.82	2.66	1e-06	7.6e-05	11.1	10.7	-0.654	0.516	0.678	-0.18	-1.13	secreted acidic cysteine rich glycoprotein [Source:MGI Symbol;Acc:MGI:98373]
Pdk2	7.74	7.31	7.36	8.04	7.96	8.08	7.25	8.46	7.98	7.33	7.37	2.62	1e-06	7.6e-05	6.73	6.59	-1.97	0.054	0.154	-0.276	-1.21	pyruvate dehydrogenase kinase, isoenzyme 2 [Source:MGI Symbol;Acc:MGI:1343087]
Tkt	8.44	7.42	7.63	8.4	8.22	8.24	7.62	8.97	8.45	8.11	7.58	2.62	1e-06	7.6e-05	7.27	6.72	-3.07	0.00336	0.0278	-0.649	-1.57	transketolase [Source:MGI Symbol;Acc:MGI:105992]
Acot11	7.52	7.17	7.3	7.97	7.96	8.02	7.31	8.4	8.03	7.23	7.22	2.6	1e-06	7.6e-05	6.4	6.34	-0.604	0.549	0.703	-0.0665	-1.05	acyl-CoA thioesterase 11 [Source:MGI Symbol;Acc:MGI:1913736]
Mt2	8.02	8.17	7.49	8.25	8.17	8.2	10	11.3	10.8	7.33	9.19	2.59	1e-06	7.6e-05	6.38	5.92	-1.82	0.0753	0.192	-0.767	-1.7	metallothionein 2 [Source:MGI Symbol;Acc:MGI:97172]
Gcsh	7.8	7.34	7.41	8.07	8.08	8.15	7.39	8.72	8.24	7.64	7.52	2.59	1e-06	7.6e-05	6.18	6.15	0.959	0.342	0.523	0.121	1.09	glycine cleavage system protein H (aminomethyl carrier) [Source:MGI Symbol;Acc:MGI:1915383]
Lsamp	8.78	7.19	7.93	9.33	8.02	8.69	7.46	9.98	8.64	9.1	7.3	2.58	1e-06	7.6e-05	9.07	9.35	2.23	0.0299	0.104	0.365	1.29	limbic system-associated membrane protein [Source:MGI Symbol;Acc:MGI:1261760]
Agl	7.67	7.27	7.36	8.16	7.99	8.04	7.24	8.48	7.98	7.4	7.43	2.58	1e-06	7.6e-05	6.19	6.69	3.49	0.001	0.0151	0.504	1.42	amylo-1,6-glucosidase, 4-alpha-glucanotransferase [Source:MGI Symbol;Acc:MGI:1924809]
Gabrb1	7.58	7.2	7.3	8.1	7.98	8	7.3	8.62	7.93	8.29	7.3	2.56	1e-06	7.6e-05	8.19	8.49	2.23	0.0304	0.106	0.473	1.39	gamma-aminobutyric acid (GABA) A receptor, subunit beta 1 [Source:MGI Symbol;Acc:MGI:95619]
Grina	7.85	7.5	7.36	8.31	8.21	8.32	7.89	8.82	8.24	8.29	7.7	2.56	1e-06	7.6e-05	8.87	8.64	-1.92	0.0599	0.165	-0.241	-1.18	glutamate receptor, ionotropic, N-methyl D-aspartate-associated protein 1 (glutamate binding) [Source:MGI Symbol;Acc:MGI:1913418]
Ndufa12	8.3	7.55	7.93	8.78	8.56	8.55	8.13	9.33	8.83	8.8	8.38	2.53	1e-06	7.6e-05	5.79	5.59	-0.414	0.68	0.801	-0.0741	-1.05	NADH dehydrogenase (ubiquinone) 1 alpha subcomplex, 12 [Source:MGI Symbol;Acc:MGI:1913664]
mt-Nd6	7.8	7.64	7.63	8.21	8.23	8.25	7.42	8.8	8.3	7.97	8.24	2.52	1e-06	7.6e-05	9.12	8.92	-0.622	0.537	0.694	-0.128	-1.09	mitochondrially encoded NADH dehydrogenase 6 [Source:MGI Symbol;Acc:MGI:102495]
Chst1	7.54	7.17	7.36	7.98	8.05	8.08	7.22	8.52	7.91	7.96	7.27	2.52	1e-06	7.6e-05	7.28	6.85	-2.33	0.024	0.0909	-0.425	-1.34	carbohydrate (keratan sulfate Gal-6) sulfotransferase 1 [Source:MGI Symbol;Acc:MGI:1924219]
Fjx1	7.67	7.19	7.3	8.08	7.96	8.08	7.48	8.57	8.03	7.3	7.36	2.49	1e-06	7.6e-05	3.6	3.3	-1.58	0.12	0.263	-0.509	-1.42	four jointed box 1 (Drosophila) [Source:MGI Symbol;Acc:MGI:1341907]
Clu	7.89	7.35	8.13	9.09	8.08	8.29	11.5	12.2	8.68	9.42	8.6	2.48	1e-06	7.6e-05	9.25	8.93	-2.06	0.0448	0.136	-0.378	-1.3	clusterin [Source:MGI Symbol;Acc:MGI:88423]
Cd38	7.52	7.35	7.6	7.96	8.06	8.14	7.17	8.54	7.94	7.22	7.21	2.47	1e-06	7.6e-05	4.94	5.18	1.1	0.277	0.454	0.21	1.16	CD38 antigen [Source:MGI Symbol;Acc:MGI:107474]
Clstn1	7.81	7.72	7.93	8.23	8.05	8.17	8.24	8.64	8.26	7.78	7.86	2.44	1e-06	7.6e-05	9.6	9.37	-3.08	0.00329	0.0275	-0.406	-1.33	calsyntenin 1 [Source:MGI Symbol;Acc:MGI:1929895]
Tjp2	8.21	7.87	7.66	8.16	8.01	8.23	7.71	8.79	8.31	7.24	7.77	2.43	1e-06	7.6e-05	5.53	5.58	0.346	0.73	0.836	0.0415	1.03	tight junction protein 2 [Source:MGI Symbol;Acc:MGI:1341872]
Arhgef12	7.81	8.36	8.2	8.17	8.03	8.33	7.75	8.78	8.26	7.6	7.7	2.42	1e-06	7.6e-05	7.77	8.27	3.41	0.00125	0.017	0.439	1.36	Rho guanine nucleotide exchange factor (GEF) 12 [Source:MGI Symbol;Acc:MGI:1916882]
Tprkb	7.88	7.52	7.38	8.25	8.11	8.15	8.08	8.56	8.2	7.71	7.74	2.42	1e-06	7.6e-05	6.42	6.46	0.77	0.445	0.619	0.0814	1.06	Tp53rk binding protein [Source:MGI Symbol;Acc:MGI:1917036]
Cat	8.07	7.49	7.47	8.15	8.25	8.1	7.51	8.52	8.11	7.25	7.4	2.41	1e-06	7.6e-05	5.01	5.31	2.24	0.0294	0.103	0.321	1.25	catalase [Source:MGI Symbol;Acc:MGI:88271]
Cs	8	7.53	7.58	8.35	8.16	8.22	7.56	8.71	8.28	7.74	7.61	2.4	1e-06	7.6e-05	7.85	7.88	-0.571	0.571	0.721	-0.0503	-1.04	citrate synthase [Source:MGI Symbol;Acc:MGI:88529]
Apba2	7.74	7.17	7.4	8.23	8.01	8.03	7.32	8.6	7.99	7.59	7.49	2.39	1e-06	7.6e-05	7.17	6.84	-2.24	0.0296	0.104	-0.327	-1.25	amyloid beta (A4) precursor protein-binding, family A, member 2 [Source:MGI Symbol;Acc:MGI:1261791]
Hacd2	7.97	7.42	7.76	8.16	8.19	8.22	7.6	9.48	8.98	7.52	7.82	2.37	1e-06	7.6e-05	5.49	5.49	0.36	0.721	0.829	0.0506	1.04	3-hydroxyacyl-CoA dehydratase 2 [Source:MGI Symbol;Acc:MGI:1918007]
Prex2	7.56	8.09	7.92	7.97	7.98	8.12	7.26	8.5	8.07	7.24	7.46	2.37	1e-06	7.6e-05	4.98	5.64	3.18	0.00251	0.0238	0.736	1.67	phosphatidylinositol-3,4,5-trisphosphate-dependent Rac exchange factor 2 [Source:MGI Symbol;Acc:MGI:1923385]
Hey1	7.6	7.58	7.72	8.07	7.96	8.05	7.61	8.5	8.04	7.3	7.72	2.37	1e-06	7.6e-05	5.09	5.23	1.55	0.128	0.273	0.211	1.16	hairy/enhancer-of-split related with YRPW motif 1 [Source:MGI Symbol;Acc:MGI:1341800]
Bmpr1a	7.62	7.27	7.63	8.14	8	8.22	7.47	8.57	8.21	7.37	7.71	2.35	1e-06	7.6e-05	6.08	6.67	3.77	0.000427	0.0104	0.595	1.51	bone morphogenetic protein receptor, type 1A [Source:MGI Symbol;Acc:MGI:1338938]
Cbs	7.52	7.17	7.3	7.96	7.96	8.03	7.43	8.37	7.94	7.22	7.21	2.35	1e-06	7.6e-05	5.46	4.89	-3.52	0.000899	0.0143	-0.749	-1.68	cystathionine beta-synthase [Source:MGI Symbol;Acc:MGI:88285]
Bcan	8.25	7.19	7.3	9.47	7.96	8	7.59	9.83	8.88	7.24	7.26	2.32	1e-06	7.6e-05	8.03	7.93	-1.54	0.13	0.276	-0.221	-1.17	brevican [Source:MGI Symbol;Acc:MGI:1096385]
Pon2	7.73	7.79	7.75	7.99	8.29	8.36	7.51	8.68	8.19	7.27	7.39	2.32	1e-06	7.6e-05	5.72	5.61	-0.918	0.363	0.544	-0.156	-1.11	paraoxonase 2 [Source:MGI Symbol;Acc:MGI:106687]
Dag1	7.85	7.73	7.85	8.42	8.08	8.51	8.07	8.91	8.32	7.45	7.6	2.31	1e-06	7.6e-05	6.93	7	0.185	0.854	0.916	0.0206	1.01	dystroglycan 1 [Source:MGI Symbol;Acc:MGI:101864]
Ctbp2	7.57	7.66	7.55	8.13	8.05	8.16	7.69	8.51	8.13	7.53	7.55	2.31	1e-06	7.6e-05	5.93	5.59	-1.72	0.0921	0.22	-0.246	-1.19	C-terminal binding protein 2 [Source:MGI Symbol;Acc:MGI:1201686]
Kcnk1	7.52	7.17	7.3	8.22	7.96	8	7.29	8.51	7.98	7.5	7.77	2.28	1e-06	7.6e-05	6.55	7.12	3.12	0.00295	0.026	0.716	1.64	potassium channel, subfamily K, member 1 [Source:MGI Symbol;Acc:MGI:109322]
Acadm	7.9	7.85	7.84	8.29	8.33	8.36	7.81	8.85	8.48	7.56	7.96	2.27	1e-06	7.6e-05	5.39	5.46	0.878	0.384	0.563	0.132	1.1	acyl-Coenzyme A dehydrogenase, medium chain [Source:MGI Symbol;Acc:MGI:87867]
Aco2	8.6	7.96	8.05	8.5	8.23	8.4	7.67	8.98	8.37	8.37	8.25	2.27	1e-06	7.6e-05	8.97	8.96	-0.559	0.579	0.727	-0.0622	-1.04	aconitase 2, mitochondrial [Source:MGI Symbol;Acc:MGI:87880]
Prnp	9	8.62	7.74	8.81	8.17	8.39	9.43	10.5	9.74	10	9.13	2.26	1e-06	7.6e-05	9.24	9.13	-0.997	0.323	0.504	-0.0858	-1.06	prion protein [Source:MGI Symbol;Acc:MGI:97769]
Zfp91	8.45	8.1	8.21	8.56	8.55	8.58	8.11	9.11	8.5	7.78	8.37	2.26	1e-06	7.6e-05	6.9	7.38	3.59	0.00073	0.0131	0.498	1.41	zinc finger protein 91 [Source:MGI Symbol;Acc:MGI:104854]
Arap2	8.01	7.78	7.92	8.01	7.96	8.02	7.57	8.51	8.18	7.26	7.52	2.24	1e-06	7.6e-05	4.71	5.57	4.2	0.000106	0.00643	0.766	1.7	ArfGAP with RhoGAP domain, ankyrin repeat and PH domain 2 [Source:MGI Symbol;Acc:MGI:2684416]
Pitpnc1	7.54	7.89	8.1	8.19	8.26	8.05	7.91	9.09	8.68	7.71	7.5	2.24	1e-06	7.6e-05	6.48	6.72	1.98	0.0527	0.152	0.245	1.19	phosphatidylinositol transfer protein, cytoplasmic 1 [Source:MGI Symbol;Acc:MGI:1919045]
Pccb	7.96	7.31	7.47	8.23	8.24	8.2	7.5	8.57	8.23	7.54	7.87	2.21	1e-06	7.6e-05	5.51	5.05	-4.36	6.3e-05	0.00601	-0.638	-1.56	propionyl Coenzyme A carboxylase, beta polypeptide [Source:MGI Symbol;Acc:MGI:1914154]
Astn1	7.64	7.17	7.3	8.17	7.96	8	7.47	8.46	8.13	7.67	7.26	2.2	1e-06	7.6e-05	8.94	9.14	1.55	0.126	0.271	0.217	1.16	astrotactin 1 [Source:MGI Symbol;Acc:MGI:1098567]
Dirc2	8.01	7.31	7.41	8.29	8.07	8.24	7.48	8.61	8.12	7.73	7.58	2.2	1e-06	7.6e-05	6.95	6.93	-0.259	0.797	0.878	-0.0272	-1.02	disrupted in renal carcinoma 2 (human) [Source:MGI Symbol;Acc:MGI:2387188]
Slc14a1	7.52	7.17	7.3	7.98	7.98	8	7.41	8.34	7.96	7.22	7.21	2.19	1e-06	7.6e-05	3.98	4.07	0.997	0.324	0.505	0.192	1.14	solute carrier family 14 (urea transporter), member 1 [Source:MGI Symbol;Acc:MGI:1351654]
Pgm2	7.6	7.29	7.36	8.07	8.02	8.12	7.38	8.59	8.06	7.75	7.35	2.17	1e-06	7.6e-05	7.59	7.51	-0.652	0.517	0.679	-0.0835	-1.06	phosphoglucomutase 2 [Source:MGI Symbol;Acc:MGI:97565]
Chpt1	8.1	7.52	7.63	8.92	8.09	8.25	8.51	9.38	8.73	7.41	7.85	2.16	1e-06	7.6e-05	6.35	6.82	3.21	0.00226	0.0225	0.643	1.56	choline phosphotransferase 1 [Source:MGI Symbol;Acc:MGI:2384841]
Fut9	7.68	7.19	7.3	8.82	7.98	8.03	7.6	9.28	8.31	7.78	7.23	2.16	1e-06	7.6e-05	5.95	6.75	3.38	0.00139	0.0178	0.864	1.82	fucosyltransferase 9 [Source:MGI Symbol;Acc:MGI:1330859]
Slc25a33	7.61	7.29	7.41	8.02	8.04	8.08	7.47	8.43	8.03	7.53	7.8	2.16	1e-06	7.6e-05	5.43	5.27	-1.31	0.196	0.362	-0.231	-1.17	solute carrier family 25, member 33 [Source:MGI Symbol;Acc:MGI:1917806]
2017-03-02	7.72	7.85	7.83	8.55	8.11	8.29	7.48	8.88	8.27	7.63	7.69	2.15	1e-06	7.6e-05	5.55	5.13	-2.4	0.02	0.0812	-0.295	-1.23	mitochondrial amidoxime reducing component 2 [Source:MGI Symbol;Acc:MGI:1914497]
Maob	7.55	7.48	7.36	7.97	7.98	8.08	7.48	8.37	7.9	7.4	7.61	2.15	1e-06	7.6e-05	5.57	5.45	-0.966	0.338	0.519	-0.176	-1.13	monoamine oxidase B [Source:MGI Symbol;Acc:MGI:96916]
1500009C09Rik	7.62	7.17	7.36	8.27	7.98	8	7.78	8.63	8.07	7.96	7.22	2.15	1e-06	7.6e-05	7.18	6.71	-3.23	0.00213	0.0219	-0.561	-1.48	RIKEN cDNA 1500009C09 gene [Source:MGI Symbol;Acc:MGI:1923755]
Gprc5b	8.14	7.24	7.36	8.11	7.96	8.23	7.93	8.57	8.21	7.28	7.34	2.14	1e-06	7.6e-05	7.15	7.12	-1.63	0.109	0.246	-0.22	-1.16	G protein-coupled receptor, family C, group 5, member B [Source:MGI Symbol;Acc:MGI:1927596]
Camk2g	7.6	7.19	7.79	8.11	7.99	8.05	7.43	8.4	8.04	7.73	7.65	2.13	1e-06	7.6e-05	8.11	7.96	-2.05	0.0455	0.137	-0.255	-1.19	calcium/calmodulin-dependent protein kinase II gamma [Source:MGI Symbol;Acc:MGI:88259]
Atp5o	8.47	8.13	8.4	8.81	8.62	8.84	8.11	9.42	8.63	9.01	8.1	2.13	1e-06	7.6e-05	6.73	6.58	-0.909	0.368	0.548	-0.262	-1.2	ATP synthase, H+ transporting, mitochondrial F1 complex, O subunit [Source:MGI Symbol;Acc:MGI:106341]
Gng12	8.62	7.69	7.81	8.45	8.14	8.33	7.47	8.98	8.21	7.26	7.31	2.12	2e-06	0.000148	5.61	5.88	1.9	0.0634	0.171	0.231	1.17	guanine nucleotide binding protein (G protein), gamma 12 [Source:MGI Symbol;Acc:MGI:1336171]
Ank2	8.29	7.21	7.47	8.08	8.08	8.22	7.63	8.82	8.53	8.26	7.43	2.1	2e-06	0.000148	9.29	9.79	3.88	0.000297	0.00912	0.531	1.45	ankyrin 2, brain [Source:MGI Symbol;Acc:MGI:88025]
B3galt2	7.57	7.17	7.3	8.13	7.96	8	7.13	8.4	7.89	7.4	7.47	2.07	2e-06	0.000148	4.61	5.14	2.38	0.0208	0.0833	0.597	1.51	UDP-Gal:betaGlcNAc beta 1,3-galactosyltransferase, polypeptide 2 [Source:MGI Symbol;Acc:MGI:1349461]
Trp53bp2	8.08	7.31	7.36	8.06	8.05	8.23	7.93	8.59	8.14	7.37	7.8	2.06	2e-06	0.000148	5.4	5.25	-2.06	0.0448	0.136	-0.247	-1.19	transformation related protein 53 binding protein 2 [Source:MGI Symbol;Acc:MGI:2138319]
Snapc5	7.91	7.65	8.03	8.21	8.26	8.26	7.48	8.61	8.2	7.53	7.8	2.06	2e-06	0.000148	2.47	2.14	-1.62	0.111	0.249	-0.486	-1.4	small nuclear RNA activating complex, polypeptide 5 [Source:MGI Symbol;Acc:MGI:1914282]
Dtx1	7.62	7.17	7.36	8.1	7.96	8.06	7.68	8.37	8.08	7.6	7.27	2.05	3e-06	0.000193	6.95	6.53	-3.31	0.00173	0.0197	-0.416	-1.33	deltex 1 homolog (Drosophila) [Source:MGI Symbol;Acc:MGI:1352744]
Hmgcr	8.15	7.29	7.41	8.26	7.98	8.07	7.3	8.56	8.01	7.66	7.58	2.04	3e-06	0.000193	7.17	7.73	4.52	3.6e-05	0.00553	0.6	1.52	3-hydroxy-3-methylglutaryl-Coenzyme A reductase [Source:MGI Symbol;Acc:MGI:96159]
Prkar2a	7.68	7.59	7.55	8.11	8.08	8.1	7.36	8.49	8.06	8.04	7.89	2.04	3e-06	0.000193	7.19	7.13	-0.26	0.796	0.877	-0.0274	-1.02	protein kinase, cAMP dependent regulatory, type II alpha [Source:MGI Symbol;Acc:MGI:108025]
Emp2	7.54	8.24	7.89	7.96	7.98	8.13	7.76	8.5	8.21	7.22	7.33	2.02	3e-06	0.000193	3.89	3.8	-0.714	0.479	0.648	-0.104	-1.07	epithelial membrane protein 2 [Source:MGI Symbol;Acc:MGI:1098726]

## Sheet: Oligodendrocyte
Symbol	Oligodend.avg	EndothelialCells.avg	MuralCells.avg	NG.OPC.avg	PVMMicro.avg	Fibroblast.avg	Ependymocytes.avg	Astrocyte.avg	Tanycyte.avg	Neurons.avg	ParsTuber.avg	Oligodend.min.t	Oligodend.p	Oligodend.FDR	HTM.Basal_3h.avg	HTM.Low_3h.avg	HTM_Low_3h.t	HTM_Low_3h.p	HTM_Low_3h.FDR	HTM_Low_3h.logFC	HTM_Low_3h.FC	Description
Plp1	16.2	7.35	7.79	8.79	8.33	8.23	7.58	9.61	8.18	7.59	7.66	27.1	1e-06	2.8e-05	10.7	11.1	2.5	0.0157	0.0698	0.475	1.39	proteolipid protein (myelin) 1 [Source:MGI Symbol;Acc:MGI:97623]
Mbp	13.4	7.29	7.58	8.13	8.6	8.19	7.35	8.18	8.03	7.65	7.5	23.7	1e-06	2.8e-05	11.3	11.5	0.193	0.848	0.912	0.0382	1.03	myelin basic protein [Source:MGI Symbol;Acc:MGI:96925]
Cldn11	11.9	7.17	7.3	7.99	7.98	8.14	7.14	7.95	7.9	7.24	7.29	20.4	1e-06	2.8e-05	6.87	7.09	0.451	0.654	0.783	0.0957	1.07	claudin 11 [Source:MGI Symbol;Acc:MGI:106925]
Mag	11.5	7.19	7.41	7.98	8.15	8.03	7.18	7.89	7.92	7.3	7.23	18.4	1e-06	2.8e-05	6.94	7.15	0.322	0.749	0.848	0.0753	1.05	myelin-associated glycoprotein [Source:MGI Symbol;Acc:MGI:96912]
Mobp	11.2	7.26	7.3	8.02	8.24	8.08	7.21	8.06	7.94	7.27	7.27	15.2	1e-06	2.8e-05	9.91	10.2	0.84	0.405	0.584	0.173	1.13	myelin-associated oligodendrocytic basic protein [Source:MGI Symbol;Acc:MGI:108511]
Tspan2	10.7	7.25	7.49	8.2	7.98	8	7.61	7.84	7.94	7.45	8.11	14	1e-06	2.8e-05	6.89	7.3	2.42	0.019	0.079	0.361	1.28	tetraspanin 2 [Source:MGI Symbol;Acc:MGI:1917997]
Mal	11	8.91	7.84	7.97	7.96	8.05	7.32	7.84	7.91	7.24	7.35	13.8	1e-06	2.8e-05	7.61	8	2.45	0.0175	0.075	0.378	1.3	myelin and lymphocyte protein, T cell differentiation protein [Source:MGI Symbol;Acc:MGI:892970]
Sirt2	11.3	7.57	7.75	9.05	8.63	8.37	8.31	8.3	8.49	7.64	7.63	13.7	1e-06	2.8e-05	6.49	6.19	-2.74	0.00832	0.0469	-0.507	-1.42	sirtuin 2 [Source:MGI Symbol;Acc:MGI:1927664]
Cnp	12.7	7.25	7.41	8.59	8.1	8.17	8.53	9.6	8.29	7.39	7.35	13.3	1e-06	2.8e-05	8.32	8.39	0.254	0.801	0.881	0.0481	1.03	2',3'-cyclic nucleotide 3' phosphodiesterase [Source:MGI Symbol;Acc:MGI:88437]
Enpp2	11.6	7.85	7.7	9.39	7.98	8.33	7.46	8.65	7.94	7.5	7.25	13.2	1e-06	2.8e-05	7.8	8.32	0.881	0.382	0.561	0.56	1.47	ectonucleotide pyrophosphatase/phosphodiesterase 2 [Source:MGI Symbol;Acc:MGI:1321390]
Mog	10.4	7.17	7.3	7.96	7.98	8.02	7.13	7.84	7.89	7.23	7.22	12.9	1e-06	2.8e-05	5.77	6.01	0.848	0.4	0.58	0.179	1.13	myelin oligodendrocyte glycoprotein [Source:MGI Symbol;Acc:MGI:97435]
Ugt8a	10.3	7.17	7.3	8.31	7.98	8.02	7.13	7.84	7.89	7.23	7.28	12.7	1e-06	2.8e-05	4.5	5.32	3.79	0.000393	0.00998	0.837	1.79	UDP galactosyltransferase 8A [Source:MGI Symbol;Acc:MGI:109522]
Ermn	10.3	7.17	7.3	7.96	7.98	8	7.16	7.84	7.89	7.23	7.21	12.6	1e-06	2.8e-05	5.27	5.9	3.11	0.00308	0.0266	0.669	1.59	ermin, ERM-like protein [Source:MGI Symbol;Acc:MGI:1925017]
Bcas1	10.5	7.17	7.3	9.17	8.01	8	7.45	7.89	7.9	7.24	7.24	12.6	1e-06	2.8e-05	7.23	7.31	0.148	0.883	0.932	0.0307	1.02	breast carcinoma amplified sequence 1 [Source:MGI Symbol;Acc:MGI:1924210]
Cryab	11.2	7.24	7.58	8.89	8.07	8.53	7.7	8.51	8.12	7.23	7.68	12.6	1e-06	2.8e-05	4.85	4.89	-0.323	0.748	0.847	-0.0858	-1.06	crystallin, alpha B [Source:MGI Symbol;Acc:MGI:88516]
Tubb4a	10.1	7.17	7.3	8.18	7.99	8.03	7.16	7.84	7.92	7.81	7.31	11.2	1e-06	2.8e-05	8.86	8.67	-2.03	0.0479	0.142	-0.343	-1.27	tubulin, beta 4A class IVA [Source:MGI Symbol;Acc:MGI:107848]
Slc44a1	9.87	7.61	7.89	8.26	8.08	8.13	7.5	7.98	7.98	7.27	7.47	9.28	1e-06	2.8e-05	6.15	6.55	2.61	0.0119	0.0585	0.337	1.26	solute carrier family 44, member 1 [Source:MGI Symbol;Acc:MGI:2140592]
Rtn4	10.6	7.81	8	8.96	8.75	8.77	8.92	8.68	9.11	9.24	8.42	9.19	1e-06	2.8e-05	8.92	9.17	2.48	0.0164	0.0718	0.316	1.25	reticulon 4 [Source:MGI Symbol;Acc:MGI:1915835]
Aplp1	10.7	7.24	7.41	8.31	8.01	8.12	7.54	8.37	8.13	9.33	9.52	9.16	1e-06	2.8e-05	9.55	9.15	-3.36	0.00146	0.0183	-0.54	-1.45	amyloid beta (A4) precursor-like protein 1 [Source:MGI Symbol;Acc:MGI:88046]
2017-09-04	10.4	7.98	8.42	8	7.99	8.22	7.38	8.06	7.97	7.34	7.28	9.01	1e-06	2.8e-05	7.09	7.15	0.357	0.723	0.831	0.072	1.05	septin 4 [Source:MGI Symbol;Acc:MGI:1270156]
Stmn4	9.8	7.21	7.47	8.62	7.99	8.03	7.15	7.89	7.91	8.74	7.3	8.79	1e-06	2.8e-05	7.07	6.65	-1.7	0.095	0.225	-0.432	-1.35	stathmin-like 4 [Source:MGI Symbol;Acc:MGI:1931224]
Opalin	9.52	7.19	7.3	7.96	7.96	8	7.13	7.84	7.89	7.22	7.22	8.5	1e-06	2.8e-05	1.99	2.12	-0.783	0.437	0.614	-0.285	-1.22	oligodendrocytic myelin paranodal and inner loop protein [Source:MGI Symbol;Acc:MGI:2657025]
Grb14	9.61	7.79	7.47	8.08	8	8	7.29	7.89	7.91	7.36	7.38	8.41	1e-06	2.8e-05	3.72	4	2.13	0.0377	0.122	0.327	1.25	growth factor receptor bound protein 14 [Source:MGI Symbol;Acc:MGI:1355324]
Fa2h	9.44	7.17	7.3	8.15	7.96	8	7.13	7.84	7.89	7.22	7.21	8.19	1e-06	2.8e-05	4.3	4.46	-0.212	0.833	0.902	-0.0481	-1.03	fatty acid 2-hydroxylase [Source:MGI Symbol;Acc:MGI:2443327]
Qdpr	10.1	7.59	7.53	8.3	8.21	8.1	7.53	8.37	8.2	8	7.74	7.59	1e-06	2.8e-05	5.92	5.67	-1.82	0.0748	0.192	-0.422	-1.34	quinoid dihydropteridine reductase [Source:MGI Symbol;Acc:MGI:97836]
Gltp	9.52	7.56	7.55	8.63	8.5	8.13	7.2	7.95	8.01	7.25	7.44	7.59	1e-06	2.8e-05	4.82	5.18	2.78	0.00752	0.0442	0.444	1.36	glycolipid transfer protein [Source:MGI Symbol;Acc:MGI:1929253]
Pllp	10.6	8.17	7.63	9.78	7.99	8	7.14	7.84	7.89	7.23	7.32	7.52	1e-06	2.8e-05	3.84	3.64	-1.91	0.062	0.169	-0.544	-1.46	plasma membrane proteolipid [Source:MGI Symbol;Acc:MGI:1915051]
Nfasc	9.57	7.19	7.36	8.15	7.98	8.07	7.26	8.08	7.95	7.66	7.96	6.92	1e-06	2.8e-05	8.5	8.5	-1.45	0.154	0.308	-0.14	-1.1	neurofascin [Source:MGI Symbol;Acc:MGI:104753]
2017-09-07	11.9	9.59	10.2	10.8	8.83	9.63	8.49	9.91	9.35	9.77	9.35	6.83	1e-06	2.8e-05	8.05	8.42	3.45	0.00112	0.016	0.463	1.38	septin 7 [Source:MGI Symbol;Acc:MGI:1335094]
Cd9	11	7.42	8.61	10	9.2	8.71	9.95	9.38	9.88	7.26	8.27	6.63	1e-06	2.8e-05	5.02	4.91	-1.32	0.192	0.357	-0.249	-1.19	CD9 antigen [Source:MGI Symbol;Acc:MGI:88348]
Chn2	9.19	7.49	7.36	8.04	8.07	8	7.25	7.84	7.9	7.35	7.22	6.5	1e-06	2.8e-05	4.79	4.78	-0.785	0.436	0.612	-0.127	-1.09	chimerin 2 [Source:MGI Symbol;Acc:MGI:1917243]
Tmem88b	9.12	7.19	7.3	7.97	7.96	8	7.14	7.84	7.89	7.23	7.21	6.47	1e-06	2.8e-05	6.03	6.66	3.32	0.00165	0.0192	0.591	1.51	transmembrane protein 88B [Source:MGI Symbol;Acc:MGI:2444329]
Mapt	9.46	7.24	7.55	8.54	8.01	8.03	7.24	8.17	8.09	8.98	7.51	6.46	1e-06	2.8e-05	9.98	9.86	-0.253	0.801	0.881	-0.0261	-1.02	microtubule-associated protein tau [Source:MGI Symbol;Acc:MGI:97180]
Desi1	9.33	7.26	7.6	8.18	8.01	8.07	7.25	8.01	8.04	7.44	7.4	6.25	1e-06	2.8e-05	6.47	6.56	0.871	0.388	0.566	0.11	1.08	desumoylating isopeptidase 1 [Source:MGI Symbol;Acc:MGI:106313]
Taldo1	10.3	8.35	7.94	8.68	8.79	8.45	7.82	8.83	8.54	7.87	8.09	6.22	1e-06	2.8e-05	5.25	4.65	-2.44	0.0182	0.0766	-0.879	-1.84	transaldolase 1 [Source:MGI Symbol;Acc:MGI:1274789]
Tmeff2	9.18	7.17	7.36	8.08	7.98	8.12	7.13	7.84	7.89	7.55	7.23	6.13	1e-06	2.8e-05	5.66	5.61	-1.33	0.19	0.354	-0.213	-1.16	transmembrane protein with EGF-like and two follistatin-like domains 2 [Source:MGI Symbol;Acc:MGI:1861735]
Lgi3	9.2	7.17	7.3	7.97	7.96	8.02	7.16	7.89	7.92	7.45	7.23	6.13	1e-06	2.8e-05	7.45	7.47	-0.644	0.522	0.683	-0.0914	-1.07	leucine-rich repeat LGI family, member 3 [Source:MGI Symbol;Acc:MGI:2182619]
Pdlim2	9	7.26	7.6	7.97	8.01	8.18	7.32	7.84	7.91	7.22	7.23	5.83	1e-06	2.8e-05	2.82	2.82	-0.651	0.518	0.679	-0.211	-1.16	PDZ and LIM domain 2 [Source:MGI Symbol;Acc:MGI:2384850]
Arpc1a	9.66	7.77	7.92	8.67	8.24	8.41	7.68	8.37	8.5	8.65	8.42	5.67	1e-06	2.8e-05	7.01	6.45	-3.6	0.000722	0.0131	-0.621	-1.54	actin related protein 2/3 complex, subunit 1A [Source:MGI Symbol;Acc:MGI:1928896]
Ttll7	9.05	7.64	7.71	8.1	8.01	8.02	7.2	7.84	7.97	7.75	7.58	5.65	1e-06	2.8e-05	7.29	8.22	5.52	1.09e-06	0.00338	1	2	tubulin tyrosine ligase-like family, member 7 [Source:MGI Symbol;Acc:MGI:1918142]
Agpat4	9.16	7.32	7.52	8.17	8.04	8.2	8.31	7.95	8.17	7.98	7.53	5.59	1e-06	2.8e-05	6.35	6.09	-1.56	0.124	0.268	-0.221	-1.17	1-acylglycerol-3-phosphate O-acyltransferase 4 (lysophosphatidic acid acyltransferase, delta) [Source:MGI Symbol;Acc:MGI:1915512]
Slc12a2	9.28	7.26	7.99	8.16	8.57	8.55	7.32	8.06	8.05	7.42	7.44	5.46	1e-06	2.8e-05	6.21	7.02	3.06	0.00352	0.0286	0.768	1.7	solute carrier family 12, member 2 [Source:MGI Symbol;Acc:MGI:101924]
Syt11	11.2	7.35	7.41	9.94	8.18	8.07	8.15	9.91	9.12	9.8	7.71	5.43	1e-06	2.8e-05	9.74	9.63	0.023	0.982	0.991	0.00214	1	synaptotagmin XI [Source:MGI Symbol;Acc:MGI:1859547]
Secisbp2l	9.77	7.71	7.65	8.36	8.35	8.13	7.68	8.5	8.35	7.55	7.8	5.38	1e-06	2.8e-05	7.03	7.5	3.26	0.00199	0.0211	0.512	1.43	SECIS binding protein 2-like [Source:MGI Symbol;Acc:MGI:1917604]
Cers2	9.11	7.51	7.7	8.15	8.16	8.31	7.4	7.95	8.32	7.4	7.58	5.26	1e-06	2.8e-05	6.03	6	-0.83	0.41	0.589	-0.12	-1.09	ceramide synthase 2 [Source:MGI Symbol;Acc:MGI:1924143]
Ptgds	11	7.21	7.66	8.05	8.14	10.2	7.27	7.95	8.38	7.32	7.38	5.25	1e-06	2.8e-05	8.91	9.01	-0.234	0.816	0.89	-0.105	-1.08	prostaglandin D2 synthase (brain) [Source:MGI Symbol;Acc:MGI:99261]
Fyn	9.53	7.61	7.71	8.72	7.99	8.09	7.35	8.26	8.05	7.59	7.39	5.2	1e-06	2.8e-05	7.12	6.83	-3.29	0.00181	0.0202	-0.334	-1.26	Fyn proto-oncogene [Source:MGI Symbol;Acc:MGI:95602]
Gamt	9.15	7.32	7.81	8.01	8.08	8.03	7.15	8.01	8.07	7.33	7.29	5.15	1e-06	2.8e-05	2.71	2.45	-0.443	0.66	0.787	-0.123	-1.09	guanidinoacetate methyltransferase [Source:MGI Symbol;Acc:MGI:1098221]
Ccp110	8.89	7.33	7.36	8.03	8.03	8.1	7.5	7.84	8.05	7.49	7.51	5.02	1e-06	2.8e-05	6	6.46	3.41	0.00127	0.017	0.421	1.34	centriolar coiled coil protein 110 [Source:MGI Symbol;Acc:MGI:2141942]
Tppp	9.05	7.19	7.36	8.08	8.16	8	7.39	7.98	7.93	7.64	7.27	5.01	1e-06	2.8e-05	8.18	8.36	1.3	0.201	0.368	0.147	1.11	tubulin polymerization promoting protein [Source:MGI Symbol;Acc:MGI:1920198]
2810468N07Rik	9	7.17	7.36	8.34	7.99	8.07	7.23	7.95	8.02	7.29	7.21	5	1e-06	2.8e-05	5.06	5.12	0.146	0.884	0.933	0.029	1.02	RIKEN cDNA 2810468N07 gene [Source:MGI Symbol;Acc:MGI:1920084]
Ank3	8.99	7.19	7.41	8.36	8.04	8.05	7.58	7.89	7.96	8.33	7.78	4.8	1e-06	2.8e-05	8.8	9.23	4.24	9.17e-05	0.00619	0.505	1.42	ankyrin 3, epithelial [Source:MGI Symbol;Acc:MGI:88026]
Elavl3	8.93	7.17	7.36	8.25	8.02	8.03	7.19	7.89	7.91	8.21	7.33	4.79	1e-06	2.8e-05	8.16	7.98	-0.45	0.654	0.783	-0.0447	-1.03	ELAV (embryonic lethal, abnormal vision, Drosophila)-like 3 (Hu antigen C) [Source:MGI Symbol;Acc:MGI:109157]
Josd2	9.17	7.21	7.49	8.1	7.99	8.2	7.7	8.15	8.09	7.49	7.37	4.64	1e-06	2.8e-05	5.37	4.95	-2.47	0.0169	0.0732	-0.569	-1.48	Josephin domain containing 2 [Source:MGI Symbol;Acc:MGI:1913374]
Gatm	10.2	8.44	7.62	8.92	9.52	8.21	7.13	8.94	7.9	7.25	7.26	4.6	1e-06	2.8e-05	6.2	6.82	2.97	0.00447	0.0326	0.514	1.43	glycine amidinotransferase (L-arginine:glycine amidinotransferase) [Source:MGI Symbol;Acc:MGI:1914342]
Enpp6	8.76	7.17	7.36	7.97	7.96	8	7.13	7.84	7.89	7.22	7.21	4.59	1e-06	2.8e-05	1.03	2.21	3.63	0.000647	0.0124	1.13	2.19	ectonucleotide pyrophosphatase/phosphodiesterase 6 [Source:MGI Symbol;Acc:MGI:2445171]
Deb1	9.14	7.35	7.36	8.58	8.12	8.34	7.45	8.06	8.15	7.93	7.86	4.56	1e-06	2.8e-05	5.09	5	-0.927	0.358	0.539	-0.209	-1.16	differentially expressed in B16F10 1 [Source:MGI Symbol;Acc:MGI:1349474]
Ppp1r14a	8.76	7.19	7.75	7.97	7.96	8.12	7.14	7.84	7.89	7.22	7.21	4.54	1e-06	2.8e-05	2.29	2.24	-0.643	0.523	0.683	-0.261	-1.2	protein phosphatase 1, regulatory (inhibitor) subunit 14A [Source:MGI Symbol;Acc:MGI:1931139]
Ywhaq	10	8.13	8.8	8.91	8.22	8.53	8.13	8.89	8.95	9.15	8.59	4.53	1e-06	2.8e-05	8.06	8.17	1.62	0.11	0.248	0.271	1.21	tyrosine 3-monooxygenase/tryptophan 5-monooxygenase activation protein, theta polypeptide [Source:MGI Symbol;Acc:MGI:891963]
Cpox	8.92	7.27	7.47	8.16	8.02	8.08	7.32	7.92	8.01	7.58	7.56	4.52	1e-06	2.8e-05	5.4	5.62	2.09	0.0419	0.13	0.261	1.2	coproporphyrinogen oxidase [Source:MGI Symbol;Acc:MGI:104841]
Car2	10.1	7.81	7.3	7.96	7.99	8.02	7.17	9.12	8.03	7.23	7.5	4.52	1e-06	2.8e-05	5.99	6.35	1.69	0.0972	0.228	0.3	1.23	carbonic anhydrase 2 [Source:MGI Symbol;Acc:MGI:88269]
Slc48a1	9.14	7.36	7.58	8.16	8.04	8.19	7.35	8.12	8.1	7.58	7.54	4.49	1e-06	2.8e-05	6.85	6.65	-1.4	0.167	0.324	-0.202	-1.15	solute carrier family 48 (heme transporter), member 1 [Source:MGI Symbol;Acc:MGI:1914989]
Osbpl1a	9.63	8.01	7.82	8.2	8.1	8.2	7.92	8.51	8.2	7.7	8.15	4.44	1e-06	2.8e-05	6.63	7.17	3.32	0.00166	0.0193	0.481	1.4	oxysterol binding protein-like 1A [Source:MGI Symbol;Acc:MGI:1927551]
Pcdh9	9.41	7.17	7.36	8.81	8.04	8.23	7.41	8.36	8.46	8.14	7.67	4.38	1e-06	2.8e-05	6.75	7.37	4.08	0.000154	0.00736	0.678	1.6	protocadherin 9 [Source:MGI Symbol;Acc:MGI:1306801]
Kcna1	8.71	7.17	7.3	8.15	7.96	8	7.21	7.84	7.89	7.26	7.23	4.34	1e-06	2.8e-05	6.96	7.91	4.2	0.000106	0.00643	0.82	1.77	potassium voltage-gated channel, shaker-related subfamily, member 1 [Source:MGI Symbol;Acc:MGI:96654]
Mapk8ip1	8.85	7.17	7.3	8.13	8.02	8.03	7.61	7.99	8.26	7.72	8.03	4.11	1e-06	2.8e-05	8.82	8.65	-2.3	0.0255	0.0946	-0.251	-1.19	mitogen-activated protein kinase 8 interacting protein 1 [Source:MGI Symbol;Acc:MGI:1309464]
Map7d1	9.27	8.1	8.19	8.14	8.23	8.34	7.46	8.18	8.19	7.89	7.66	4.1	1e-06	2.8e-05	7.46	7.11	-2.71	0.00921	0.05	-0.38	-1.3	MAP7 domain containing 1 [Source:MGI Symbol;Acc:MGI:2384297]
Plekha1	8.71	7.58	7.52	7.99	8.11	8.09	7.16	7.84	7.93	7.4	7.44	4.1	1e-06	2.8e-05	6.89	7.09	1.47	0.147	0.299	0.158	1.12	pleckstrin homology domain containing, family A (phosphoinositide binding specific) member 1 [Source:MGI Symbol;Acc:MGI:2442213]
Gm21984	8.59	7.17	7.3	7.96	7.96	8	7.14	7.84	7.89	7.22	7.21	3.85	1e-06	2.8e-05	3.65	4.59	3.33	0.00159	0.019	0.979	1.97	predicted gene 21984 [Source:MGI Symbol;Acc:MGI:5439453]
Elovl7	8.65	8.06	7.64	7.97	7.96	8	7.35	7.84	7.91	7.23	7.26	3.82	1e-06	2.8e-05	3.84	4.44	1.37	0.175	0.336	0.459	1.37	ELOVL family member 7, elongation of long chain fatty acids (yeast) [Source:MGI Symbol;Acc:MGI:1921809]
Vmp1	8.85	7.41	7.41	8.2	8.14	8.23	7.53	8.03	8.16	7.88	7.79	3.78	1e-06	2.8e-05	6.3	6.39	-0.268	0.789	0.874	-0.0283	-1.02	vacuole membrane protein 1 [Source:MGI Symbol;Acc:MGI:1923159]
Rnf7	9.11	7.96	8.14	8.54	8.44	8.49	7.96	8.3	8.63	8.17	8.18	3.68	1e-06	2.8e-05	5.26	5.09	-0.23	0.819	0.892	-0.0374	-1.03	ring finger protein 7 [Source:MGI Symbol;Acc:MGI:1337096]
Jam3	8.85	7.19	7.78	8.31	7.98	8.16	7.81	8.01	8.49	7.46	7.42	3.68	1e-06	2.8e-05	5.75	5.59	-1.6	0.116	0.257	-0.202	-1.15	junction adhesion molecule 3 [Source:MGI Symbol;Acc:MGI:1933825]
Trf	10.5	7.24	7.49	7.97	10	8.63	7.23	7.89	7.93	7.3	7.23	3.66	1e-06	2.8e-05	2.84	2.69	-0.605	0.548	0.703	-0.199	-1.15	transferrin [Source:MGI Symbol;Acc:MGI:98821]
Ap2a1	8.71	7.43	7.41	8.23	7.98	8.07	7.35	7.95	7.96	7.52	7.36	3.63	1e-06	2.8e-05	8.26	7.98	-3.13	0.00289	0.0257	-0.437	-1.35	adaptor-related protein complex 2, alpha 1 subunit [Source:MGI Symbol;Acc:MGI:101921]
Rab33a	8.62	7.19	7.3	8.13	7.96	8	7.14	7.84	7.89	7.32	7.21	3.59	1e-06	2.8e-05	2.06	1.23	-2.7	0.00946	0.0509	-1.07	-2.1	RAB33A, member RAS oncogene family [Source:MGI Symbol;Acc:MGI:109493]
Gjc2	8.58	7.19	7.3	7.96	7.96	8.03	7.14	7.84	7.89	7.22	7.22	3.55	1e-06	2.8e-05	2.47	2.7	0.167	0.868	0.924	0.0497	1.04	gap junction protein, gamma 2 [Source:MGI Symbol;Acc:MGI:2153060]
Fez1	10	7.26	7.45	9.14	8.04	8.16	8.21	9.14	8.32	8.32	7.44	3.53	1e-06	2.8e-05	7.55	7.45	-1.55	0.127	0.272	-0.172	-1.13	fasciculation and elongation protein zeta 1 (zygin I) [Source:MGI Symbol;Acc:MGI:2670976]
Thra	9.46	7.93	7.68	8.87	8.04	8.53	8.5	8.65	9.01	8.69	7.93	3.49	1e-06	2.8e-05	9.35	8.81	-3.29	0.00179	0.0201	-0.72	-1.65	thyroid hormone receptor alpha [Source:MGI Symbol;Acc:MGI:98742]
Pak1	8.66	7.19	7.3	8.18	8.24	8.03	7.15	7.84	7.94	8.24	7.47	3.47	1e-06	2.8e-05	7.99	8.17	1.06	0.295	0.475	0.13	1.09	p21 protein (Cdc42/Rac)-activated kinase 1 [Source:MGI Symbol;Acc:MGI:1339975]
Aatk	8.61	7.17	7.36	8.02	7.99	8.02	7.16	7.84	7.92	7.57	7.24	3.44	1e-06	2.8e-05	8.43	8.29	-1.98	0.0534	0.153	-0.237	-1.18	apoptosis-associated tyrosine kinase [Source:MGI Symbol;Acc:MGI:1197518]
Adamts4	8.56	7.17	7.36	7.97	7.96	8.02	7.13	7.84	7.89	7.22	7.21	3.39	1e-06	2.8e-05	4.04	4.55	1.81	0.0769	0.195	0.356	1.28	a disintegrin-like and metallopeptidase (reprolysin type) with thrombospondin type 1 motif, 4 [Source:MGI Symbol;Acc:MGI:1339949]
Gjc3	9.35	7.17	7.3	9	7.96	8	7.14	7.84	7.89	7.22	7.22	3.39	1e-06	2.8e-05	5.95	6.5	2.9	0.00544	0.0365	0.446	1.36	gap junction protein, gamma 3 [Source:MGI Symbol;Acc:MGI:2153041]
Dst	9.02	7.79	7.87	8.66	8.44	8.16	8.32	8.23	8.53	8.29	7.93	3.38	1e-06	2.8e-05	6.44	6.57	1.61	0.114	0.253	0.265	1.2	dystonin [Source:MGI Symbol;Acc:MGI:104627]
Sh3gl3	8.6	7.17	7.36	8.09	7.96	8.05	7.16	7.84	7.9	7.57	7.22	3.35	1e-06	2.8e-05	5.7	5.27	-3.28	0.00187	0.0204	-0.447	-1.36	SH3-domain GRB2-like 3 [Source:MGI Symbol;Acc:MGI:700011]
Fkbp1a	9.5	8.3	8.68	8.7	8.27	8.68	7.79	8.37	8.46	8.9	8.18	3.33	1e-06	2.8e-05	7.89	7.59	-1.58	0.12	0.262	-0.267	-1.2	FK506 binding protein 1a [Source:MGI Symbol;Acc:MGI:95541]
Tmem151a	8.54	7.17	7.3	7.96	7.98	8	7.16	7.84	7.89	7.47	7.24	3.29	1e-06	2.8e-05	6.69	6.7	-0.148	0.883	0.932	-0.0245	-1.02	transmembrane protein 151A [Source:MGI Symbol;Acc:MGI:2147713]
Map1a	9.15	7.21	7.79	8.18	8	8.13	7.62	8.39	8.21	8.53	7.54	3.28	1e-06	2.8e-05	10.2	10.1	-1.08	0.285	0.464	-0.146	-1.11	microtubule-associated protein 1 A [Source:MGI Symbol;Acc:MGI:1306776]
Ptprd	9.1	7.22	7.36	8.31	7.96	8.16	7.43	8.29	7.99	7.6	7.72	3.26	1e-06	2.8e-05	7.39	7.92	4.08	0.000157	0.00744	0.711	1.64	protein tyrosine phosphatase, receptor type, D [Source:MGI Symbol;Acc:MGI:97812]
Dusp26	8.55	7.19	7.36	8.18	7.99	8	7.37	7.89	7.91	8.37	7.35	3.17	1e-06	2.8e-05	6.66	6.06	-2.82	0.00677	0.0414	-0.577	-1.49	dual specificity phosphatase 26 (putative) [Source:MGI Symbol;Acc:MGI:1914209]
1700047M11Rik	8.51	7.17	7.3	7.98	7.96	8.02	7.13	7.84	7.89	7.22	7.21	3.13	1e-06	2.8e-05	2.92	3.11	0.465	0.644	0.776	0.124	1.09	RIKEN cDNA 1700047M11 gene [Source:MGI Symbol;Acc:MGI:1914580]
Plekhb1	9.86	7.17	7.36	9.06	8.14	8.12	9.26	9.02	8.56	7.51	7.48	3.11	1e-06	2.8e-05	8.36	8.28	-0.73	0.469	0.641	-0.157	-1.12	pleckstrin homology domain containing, family B (evectins) member 1 [Source:MGI Symbol;Acc:MGI:1351469]
Efnb3	8.57	7.17	7.3	8.05	7.99	8.12	7.17	7.89	7.96	8.01	7.28	3.09	1e-06	2.8e-05	7.85	7.64	-1.52	0.136	0.284	-0.194	-1.14	ephrin B3 [Source:MGI Symbol;Acc:MGI:109196]
Elovl6	8.84	7.2	7.36	8.48	8.01	8.15	7.17	8.12	7.99	7.7	7.49	3.07	1e-06	2.8e-05	6.73	6.96	2.53	0.0146	0.0665	0.39	1.31	ELOVL family member 6, elongation of long chain fatty acids (yeast) [Source:MGI Symbol;Acc:MGI:2156528]
Rnf13	9.36	7.57	7.47	8.38	8.68	8.47	7.82	8.56	8.36	7.53	7.73	3.06	1e-06	2.8e-05	6.84	7.22	2.61	0.0117	0.0579	0.295	1.23	ring finger protein 13 [Source:MGI Symbol;Acc:MGI:1346341]
Dnajb2	8.68	7.26	7.7	8.09	8.02	8.16	8.36	7.95	8.34	7.78	7.85	3.05	1e-06	2.8e-05	7.08	6.87	-1.41	0.165	0.323	-0.216	-1.16	DnaJ (Hsp40) homolog, subfamily B, member 2 [Source:MGI Symbol;Acc:MGI:1928739]
Slain1	8.61	7.17	7.36	8.05	7.96	8	7.36	7.98	7.98	7.34	7.32	3.02	1e-06	2.8e-05	4.64	4.79	0.185	0.854	0.916	0.0279	1.02	SLAIN motif family, member 1 [Source:MGI Symbol;Acc:MGI:2145578]
Cfl2	9.09	7.64	7.74	8.51	8.16	8.36	7.83	8.32	8.55	8.46	7.75	2.92	1e-06	2.8e-05	6.97	7.29	2.77	0.00785	0.0453	0.425	1.34	cofilin 2, muscle [Source:MGI Symbol;Acc:MGI:101763]
2017-09-08	8.67	7.21	7.58	8.43	8.14	8.23	7.34	7.89	8.03	7.88	7.3	2.86	1e-06	2.8e-05	7.76	7.59	-1.88	0.0658	0.176	-0.181	-1.13	septin 8 [Source:MGI Symbol;Acc:MGI:894310]
Abhd17b	8.85	7.27	7.52	8.42	8.14	8.08	7.31	8.2	8.11	7.53	7.66	2.83	1e-06	2.8e-05	5.66	5.84	1.24	0.219	0.389	0.214	1.16	abhydrolase domain containing 17B [Source:MGI Symbol;Acc:MGI:1917816]
Ppp1r16b	8.46	7.56	7.52	8.01	7.96	8	7.14	7.84	7.89	7.26	7.21	2.83	1e-06	2.8e-05	6.76	6.99	1.2	0.237	0.41	0.163	1.12	protein phosphatase 1, regulatory (inhibitor) subunit 16B [Source:MGI Symbol;Acc:MGI:2151841]
Map7	8.45	7.35	7.36	8.02	8.05	8.03	7.23	7.84	7.98	7.68	7.79	2.81	1e-06	2.8e-05	6.67	6.82	0.535	0.595	0.74	0.063	1.04	microtubule-associated protein 7 [Source:MGI Symbol;Acc:MGI:1328328]
Tuba1a	11.9	8.86	9.34	11.2	8.49	9.4	11.4	10.2	10.4	10.4	9.51	2.75	1e-06	2.8e-05	7.97	7.81	-0.782	0.438	0.614	-0.0961	-1.07	tubulin, alpha 1A [Source:MGI Symbol;Acc:MGI:98869]
Degs1	9.54	7.59	7.89	8.6	8.21	8.54	7.75	8.89	8.43	7.99	8.1	2.75	1e-06	2.8e-05	6.21	6.31	1.13	0.262	0.438	0.129	1.09	degenerative spermatocyte homolog 1 (Drosophila) [Source:MGI Symbol;Acc:MGI:1097711]
Zeb2	9.47	7.23	7.94	8.71	9.1	8.56	7.59	8.26	8.06	7.23	7.27	2.73	1e-06	2.8e-05	5.09	5.97	3.69	0.000535	0.0113	0.965	1.95	zinc finger E-box binding homeobox 2 [Source:MGI Symbol;Acc:MGI:1344407]
Bin1	9.95	7.37	7.6	8.21	9.54	8.15	7.32	8.08	8.03	7.96	7.73	2.61	1e-06	2.8e-05	7.63	7.3	-1.63	0.109	0.246	-0.261	-1.2	bridging integrator 1 [Source:MGI Symbol;Acc:MGI:108092]
Tspan15	8.59	7.24	7.79	8.03	7.96	8.02	7.92	7.95	8.15	7.26	7.32	2.61	1e-06	2.8e-05	4.34	4.16	-2.42	0.0191	0.0791	-0.511	-1.43	tetraspanin 15 [Source:MGI Symbol;Acc:MGI:1917673]
Gpr37	8.83	7.17	7.3	7.97	7.96	8.02	7.41	8.2	8.18	7.24	7.24	2.61	1e-06	2.8e-05	6.17	6.5	1.2	0.236	0.408	0.183	1.14	G protein-coupled receptor 37 [Source:MGI Symbol;Acc:MGI:1313297]
Abca2	8.53	7.24	7.41	8.05	8.01	8.03	7.42	7.95	7.98	7.41	7.31	2.6	1e-06	2.8e-05	9.11	9.15	-1.18	0.242	0.416	-0.148	-1.11	ATP-binding cassette, sub-family A (ABC1), member 2 [Source:MGI Symbol;Acc:MGI:99606]
Tmod1	8.41	7.19	7.3	8	7.99	8	7.64	7.89	7.91	7.29	7.36	2.55	1e-06	2.8e-05	2.83	2.41	-2.07	0.0433	0.133	-0.648	-1.57	tropomodulin 1 [Source:MGI Symbol;Acc:MGI:98775]
Erbb2ip	8.76	7.76	8.09	8.2	8.32	8.4	7.66	8.09	8.28	7.37	7.9	2.53	1e-06	2.8e-05	6.18	6.91	3.85	0.000329	0.00949	0.633	1.55	Erbb2 interacting protein [Source:MGI Symbol;Acc:MGI:1890169]
Elovl1	8.52	7.61	7.74	8	8.22	8.1	7.18	7.89	7.94	7.25	7.35	2.52	1e-06	2.8e-05	4.16	4.33	0.285	0.777	0.865	0.0474	1.03	elongation of very long chain fatty acids (FEN1/Elo2, SUR4/Elo3, yeast)-like 1 [Source:MGI Symbol;Acc:MGI:1858959]
Sez6l2	8.37	7.17	7.36	8.04	7.98	8	7.2	7.84	7.9	8.29	7.93	2.5	1e-06	2.8e-05	8.98	8.89	-1.55	0.127	0.272	-0.186	-1.14	seizure related 6 homolog like 2 [Source:MGI Symbol;Acc:MGI:2385295]
Reep5	9.44	7.95	8.08	8.89	8.64	8.7	8.37	8.82	8.69	9.1	8.26	2.5	1e-06	2.8e-05	8.42	8.31	-1.07	0.288	0.467	-0.114	-1.08	receptor accessory protein 5 [Source:MGI Symbol;Acc:MGI:1270152]
Car14	8.43	7.24	7.36	7.96	7.96	8	7.14	7.89	7.91	7.22	7.22	2.5	1e-06	2.8e-05	3.54	4.24	1.89	0.0642	0.173	0.504	1.42	carbonic anhydrase 14 [Source:MGI Symbol;Acc:MGI:1344341]
Rap1a	9.15	7.89	8.43	8.49	8.53	8.46	7.53	8.06	8.25	7.58	7.71	2.45	1e-06	2.8e-05	4.75	4.83	1.09	0.283	0.461	0.135	1.1	RAS-related protein-1a [Source:MGI Symbol;Acc:MGI:97852]
Ypel2	8.39	7.28	7.36	7.98	8.05	8	7.15	7.84	7.9	7.42	7.44	2.39	1e-06	2.8e-05	5.1	5.51	2.84	0.00642	0.0403	0.484	1.4	yippee-like 2 (Drosophila) [Source:MGI Symbol;Acc:MGI:1925114]
Ick	8.39	7.52	7.68	8.11	7.99	8.05	7.23	7.84	7.94	7.26	7.29	2.39	1e-06	2.8e-05	4.94	5.26	2.87	0.00591	0.0384	0.348	1.27	intestinal cell kinase [Source:MGI Symbol;Acc:MGI:1934157]
H2afj	8.87	7.68	7.51	8.19	8.14	8.28	7.55	8.3	8.27	7.55	7.67	2.38	1e-06	2.8e-05	2.08	2.03	-1.03	0.306	0.486	-0.321	-1.25	H2A histone family, member J [Source:MGI Symbol;Acc:MGI:3606192]
Srd5a1	8.36	7.17	7.3	8.07	7.98	8.03	7.37	7.84	7.95	7.28	7.3	2.38	1e-06	2.8e-05	2.79	2.73	-0.587	0.56	0.713	-0.109	-1.08	steroid 5 alpha-reductase 1 [Source:MGI Symbol;Acc:MGI:98400]
Gjb1	8.33	7.17	7.3	8	7.96	8	7.13	7.84	7.89	7.22	7.38	2.36	1e-06	2.8e-05	2	2.18	-0.7	0.487	0.654	-0.247	-1.19	gap junction protein, beta 1 [Source:MGI Symbol;Acc:MGI:95719]
Sccpdh	8.73	7.34	7.44	8.32	7.99	8.14	7.74	8.12	8.23	8.04	7.66	2.3	1e-06	2.8e-05	7.08	7.16	1.27	0.211	0.379	0.139	1.1	saccharopine dehydrogenase (putative) [Source:MGI Symbol;Acc:MGI:1924486]
Ppp2r3a	8.55	7.35	7.36	8.16	8.03	8.13	7.48	8.01	8.1	7.38	7.5	2.29	1e-06	2.8e-05	5.99	6.59	4.21	0.000101	0.00635	0.612	1.53	protein phosphatase 2, regulatory subunit B'', alpha [Source:MGI Symbol;Acc:MGI:2442104]
Rnf122	8.38	7.17	7.3	8.15	7.96	8	7.2	7.84	7.94	7.25	7.33	2.28	1e-06	2.8e-05	2.97	2.79	-0.629	0.532	0.69	-0.113	-1.08	ring finger protein 122 [Source:MGI Symbol;Acc:MGI:1916117]
Apbb1	8.68	7.28	7.52	8.28	8.01	8.05	7.6	8.16	8.12	8.24	8.08	2.24	1e-06	2.8e-05	8.25	7.81	-3	0.00411	0.0313	-0.506	-1.42	amyloid beta (A4) precursor protein-binding, family B, member 1 [Source:MGI Symbol;Acc:MGI:107765]
Tprn	8.33	7.24	7.36	7.97	8.01	8.02	7.13	7.84	7.91	7.25	7.27	2.23	1e-06	2.8e-05	4.24	4.06	-1.82	0.0752	0.192	-0.361	-1.28	taperin [Source:MGI Symbol;Acc:MGI:2139535]
Gm15440	8.36	7.17	7.3	7.97	7.96	8	7.14	7.84	7.89	7.26	7.22	2.2	1e-06	2.8e-05	4.55	4.33	-1.14	0.261	0.436	-0.171	-1.13	predicted gene 15440 [Source:MGI Symbol;Acc:MGI:3642353]
Rtkn	8.42	7.17	7.3	8.19	7.96	8.07	7.15	7.89	7.93	7.27	7.25	2.2	1e-06	2.8e-05	4.23	4.06	-1.49	0.141	0.291	-0.36	-1.28	rhotekin [Source:MGI Symbol;Acc:MGI:107371]
Cntn2	8.37	7.17	7.3	7.98	7.98	8	7.14	7.89	7.89	7.41	7.22	2.17	1e-06	2.8e-05	7.83	8.02	0.0517	0.959	0.978	0.00688	1	contactin 2 [Source:MGI Symbol;Acc:MGI:104518]
Qk	11.2	8.98	8.55	9.75	9.46	8.54	8.97	10.5	8.8	7.32	7.6	2.16	1e-06	2.8e-05	8.12	8.92	4.37	6.09e-05	0.00601	0.833	1.78	quaking [Source:MGI Symbol;Acc:MGI:97837]
Kif1bp	8.8	7.48	7.47	8.31	8.07	8.19	7.62	8.26	8.38	8.03	7.69	2.13	1e-06	2.8e-05	7.42	7.35	-0.93	0.357	0.537	-0.0792	-1.06	KIF1 binding protein [Source:MGI Symbol;Acc:MGI:1919570]
Dixdc1	8.41	7.46	7.36	8.14	7.99	8.13	7.6	7.89	8.12	7.63	7.32	2.12	1e-06	2.8e-05	6.87	7.15	2.18	0.0337	0.113	0.259	1.2	DIX domain containing 1 [Source:MGI Symbol;Acc:MGI:2679721]
Psat1	9.16	7.19	7.44	8.43	8.11	8.02	7.85	8.51	8.39	7.27	7.38	2.12	1e-06	2.8e-05	6.97	7.17	-0.0745	0.941	0.967	-0.0122	-1.01	phosphoserine aminotransferase 1 [Source:MGI Symbol;Acc:MGI:2183441]
Tmem125	8.32	7.17	7.3	7.96	7.96	8	7.16	7.84	7.89	7.22	7.26	2.08	1e-06	2.8e-05	2.99	3.53	1.6	0.115	0.254	0.506	1.42	transmembrane protein 125 [Source:MGI Symbol;Acc:MGI:1923409]
Rhog	8.76	7.35	7.47	8.04	8.49	8.14	7.25	7.89	7.95	7.24	7.27	2.06	1e-06	2.8e-05	3.83	3.87	0.1	0.921	0.955	0.0207	1.01	ras homolog gene family, member G [Source:MGI Symbol;Acc:MGI:1928370]
Cox6a1	10	9.16	9.39	9.74	9.26	9.12	8.69	9.35	9.53	9.41	9.46	2.05	1e-06	2.8e-05	6.91	6.79	-0.131	0.896	0.941	-0.0337	-1.02	cytochrome c oxidase subunit VIa polypeptide 1 [Source:MGI Symbol;Acc:MGI:103099]
Adssl1	8.28	7.17	7.36	7.96	8.02	8.03	7.15	7.84	7.92	7.38	7.34	2.03	1e-06	2.8e-05	4.23	4.05	-1.46	0.151	0.304	-0.398	-1.32	adenylosuccinate synthetase like 1 [Source:MGI Symbol;Acc:MGI:87947]

## Sheet: Microglia
Symbol	Oligodend.avg	EndothelialCells.avg	MuralCells.avg	NG.OPC.avg	PVMMicro.avg	Fibroblast.avg	Ependymocytes.avg	Astrocyte.avg	Tanycyte.avg	Neurons.avg	ParsTuber.avg	PVMMicro.min.t	PVMMicro.p	PVMMicro.FDR	HTM.Basal_3h.avg	HTM.Low_3h.avg	HTM_Low_3h.t	HTM_Low_3h.p	HTM_Low_3h.FDR	HTM_Low_3h.logFC	HTM_Low_3h.FC	Description
Ctss	7.54	7.2	7.54	7.98	13.3	8.36	7.15	8.19	7.9	7.24	7.26	23.4	1e-06	6.05e-05	5.31	5.16	-1.61	0.114	0.253	-0.36	-1.28	cathepsin S [Source:MGI Symbol;Acc:MGI:107341]
C1qb	7.53	7.25	7.63	8	12.8	8.42	7.15	8.22	7.9	7.23	7.22	21.2	1e-06	6.05e-05	3.59	3.33	-1.34	0.185	0.348	-0.317	-1.25	complement component 1, q subcomponent, beta polypeptide [Source:MGI Symbol;Acc:MGI:88224]
C1qc	7.53	7.19	7.44	7.99	12.4	8.39	7.13	8.15	7.9	7.23	7.22	20.2	1e-06	6.05e-05	4.02	3.74	-1.47	0.147	0.299	-0.279	-1.21	complement component 1, q subcomponent, C chain [Source:MGI Symbol;Acc:MGI:88225]
C1qa	7.52	7.2	7.44	7.98	12.2	8.35	7.15	8.11	7.89	7.23	7.23	19.3	1e-06	6.05e-05	4.38	4.15	-0.631	0.531	0.69	-0.144	-1.1	complement component 1, q subcomponent, alpha polypeptide [Source:MGI Symbol;Acc:MGI:88223]
Hexb	7.61	7.49	7.86	8.1	12.6	8.42	7.42	8.23	8.14	7.46	7.81	18.7	1e-06	6.05e-05	5.49	5.94	3.62	0.000672	0.0126	0.486	1.4	hexosaminidase B [Source:MGI Symbol;Acc:MGI:96074]
Tyrobp	7.52	7.22	7.36	7.97	11.3	8.26	7.13	8.04	7.89	7.22	7.21	15.8	1e-06	6.05e-05	1.58	1.31	-1.61	0.114	0.254	-0.67	-1.59	TYRO protein tyrosine kinase binding protein [Source:MGI Symbol;Acc:MGI:1277211]
Cx3cr1	7.53	7.17	7.52	7.99	11.2	8.22	7.13	8.07	7.89	7.23	7.23	15.3	1e-06	6.05e-05	4.44	4.21	-1.62	0.111	0.249	-0.35	-1.27	chemokine (C-X3-C motif) receptor 1 [Source:MGI Symbol;Acc:MGI:1333815]
Fcer1g	7.52	7.21	7.3	7.97	11.2	8.23	7.13	8.03	7.89	7.23	7.22	15.2	1e-06	6.05e-05	1.89	2.15	0.355	0.724	0.832	0.146	1.11	Fc receptor, IgE, high affinity I, gamma polypeptide [Source:MGI Symbol;Acc:MGI:95496]
Csf1r	7.52	7.19	7.41	7.98	11.1	8.2	7.15	8	7.9	7.23	7.21	15.1	1e-06	6.05e-05	5.74	5.72	-0.65	0.519	0.68	-0.0786	-1.06	colony stimulating factor 1 receptor [Source:MGI Symbol;Acc:MGI:1339758]
Ly86	7.52	7.19	7.36	7.98	11	8.18	7.15	8.05	7.89	7.22	7.22	14.1	1e-06	6.05e-05	2.42	2.64	0.0178	0.986	0.993	0.0044	1	lymphocyte antigen 86 [Source:MGI Symbol;Acc:MGI:1321404]
Fcrls	7.53	7.17	7.46	7.97	10.8	8.3	7.13	8.08	7.89	7.22	7.21	13.2	1e-06	6.05e-05	2.38	2.3	-1	0.322	0.502	-0.273	-1.21	Fc receptor-like S, scavenger receptor [Source:MGI Symbol;Acc:MGI:1933397]
Aif1	7.52	7.21	7.38	7.97	10.6	8.22	7.14	7.97	7.89	7.23	7.21	13.1	1e-06	6.05e-05	-0.357	-0.777	-1.63	0.108	0.245	-0.739	-1.67	allograft inflammatory factor 1 [Source:MGI Symbol;Acc:MGI:1343098]
Laptm5	7.53	7.21	7.63	7.97	10.7	8.23	7.18	8.04	7.89	7.22	7.22	13	1e-06	6.05e-05	3.2	3.01	-1.28	0.207	0.374	-0.264	-1.2	lysosomal-associated protein transmembrane 5 [Source:MGI Symbol;Acc:MGI:108046]
Trem2	7.52	7.19	7.58	7.97	10.6	8.13	7.13	7.95	7.89	7.22	7.21	12.7	1e-06	6.05e-05	1.9	1.62	-0.979	0.332	0.513	-0.284	-1.22	triggering receptor expressed on myeloid cells 2 [Source:MGI Symbol;Acc:MGI:1913150]
Siglech	7.52	7.17	7.3	7.98	10.4	8	7.14	8	7.89	7.22	7.21	11.9	1e-06	6.05e-05	2.84	2.95	0.722	0.474	0.644	0.16	1.12	sialic acid binding Ig-like lectin H [Source:MGI Symbol;Acc:MGI:2443256]
Fcgr3	7.53	7.19	7.3	7.97	10.2	8.17	7.13	7.89	7.89	7.22	7.21	11.3	1e-06	6.05e-05	2.24	1.78	-1.67	0.102	0.235	-0.512	-1.43	Fc receptor, IgG, low affinity III [Source:MGI Symbol;Acc:MGI:95500]
Lgmn	8.88	7.46	7.71	8.15	11.4	8.38	7.75	8.75	8.15	8.02	8.29	10.8	1e-06	6.05e-05	7.26	7.14	-1.32	0.194	0.36	-0.183	-1.14	legumain [Source:MGI Symbol;Acc:MGI:1330838]
Rgs10	7.53	7.25	7.49	8.01	10.3	8.16	7.29	7.98	7.91	7.53	7.23	10.7	1e-06	6.05e-05	5.63	5.33	-1.49	0.142	0.292	-0.31	-1.24	regulator of G-protein signalling 10 [Source:MGI Symbol;Acc:MGI:1915115]
P2ry12	7.52	7.17	7.45	7.98	10.1	8.08	7.17	7.95	7.89	7.22	7.21	10.6	1e-06	6.05e-05	3.15	3.64	2.54	0.014	0.0648	0.565	1.48	purinergic receptor P2Y, G-protein coupled 12 [Source:MGI Symbol;Acc:MGI:1918089]
Lyz2	7.52	7.19	7.3	7.96	10.1	8.32	7.15	7.89	7.92	7.23	7.23	10.4	1e-06	6.05e-05	2.61	2.83	0.637	0.527	0.686	0.196	1.15	lysozyme 2 [Source:MGI Symbol;Acc:MGI:96897]
Ctsd	8.28	7.96	8.41	8.45	12.1	8.91	8.06	9.31	8.48	8.27	8.6	10.4	1e-06	6.05e-05	9.06	8.77	-2.41	0.0197	0.0808	-0.339	-1.26	cathepsin D [Source:MGI Symbol;Acc:MGI:88562]
Mpeg1	7.52	7.19	7.47	7.96	10.1	8.13	7.15	7.95	7.89	7.22	7.21	10.2	1e-06	6.05e-05	4.18	4.49	1.27	0.209	0.376	0.243	1.18	macrophage expressed gene 1 [Source:MGI Symbol;Acc:MGI:1333743]
Grn	7.75	7.45	8.09	8.11	10.2	8.69	7.21	8.13	8.03	7.41	7.57	9.21	1e-06	6.05e-05	5.57	5.13	-2.33	0.024	0.0909	-0.518	-1.43	granulin [Source:MGI Symbol;Acc:MGI:95832]
Selplg	7.52	7.17	7.3	7.96	9.74	8.03	7.14	7.94	7.89	7.22	7.22	8.88	1e-06	6.05e-05	3.11	2.94	-2.36	0.022	0.0865	-0.528	-1.44	selectin, platelet (p-selectin) ligand [Source:MGI Symbol;Acc:MGI:106689]
Itgam	7.53	7.19	7.3	8	9.78	8.05	7.13	8.05	7.89	7.24	7.23	8.43	1e-06	6.05e-05	3.03	3	-0.511	0.612	0.753	-0.121	-1.09	integrin alpha M [Source:MGI Symbol;Acc:MGI:96607]
Unc93b1	7.59	7.24	7.56	7.97	9.62	8.15	7.14	7.92	7.93	7.23	7.25	8.34	1e-06	6.05e-05	2.81	2.58	-1.94	0.0583	0.162	-0.426	-1.34	unc-93 homolog B1 (C. elegans) [Source:MGI Symbol;Acc:MGI:1859307]
Cyba	7.52	7.91	8.12	7.96	10.1	8.81	7.47	8.23	8.58	7.23	7.47	8.09	1e-06	6.05e-05	0.0234	-0.588	-1.87	0.0667	0.177	-1.15	-2.22	cytochrome b-245, alpha polypeptide [Source:MGI Symbol;Acc:MGI:1316658]
Cd53	7.52	7.17	7.3	7.97	9.63	8.12	7.13	8	7.89	7.22	7.21	8.08	1e-06	6.05e-05	1.43	1.85	1.09	0.282	0.46	0.291	1.22	CD53 antigen [Source:MGI Symbol;Acc:MGI:88341]
Ctsh	7.52	8.38	7.81	7.96	9.62	8.5	8	7.84	8.04	7.22	7.29	7.84	1e-06	6.05e-05	3.26	3.15	-0.974	0.335	0.515	-0.186	-1.14	cathepsin H [Source:MGI Symbol;Acc:MGI:107285]
Fyb	7.56	7.25	7.41	7.97	9.6	8.19	7.33	8.01	7.9	7.24	7.23	7.57	1e-06	6.05e-05	0.713	1.03	0.637	0.527	0.686	0.257	1.19	FYN binding protein [Source:MGI Symbol;Acc:MGI:1346327]
Fth1	12.2	10.3	11.1	9.27	13.2	12.1	11.6	11.3	12.1	10.6	10.9	7.14	1e-06	6.05e-05	9.45	9.4	-0.591	0.557	0.711	-0.279	-1.21	ferritin heavy polypeptide 1 [Source:MGI Symbol;Acc:MGI:95588]
Clta	8.64	8.44	8.52	8.64	10.2	8.94	8.43	8.51	8.86	9.09	8.66	6.84	1e-06	6.05e-05	6.66	6.31	-1.67	0.101	0.233	-0.275	-1.21	clathrin, light polypeptide (Lca) [Source:MGI Symbol;Acc:MGI:894297]
Gpr34	7.52	7.17	7.36	7.97	9.32	8.03	7.13	7.95	7.89	7.22	7.21	6.76	1e-06	6.05e-05	1.68	2.28	1.82	0.0741	0.19	0.533	1.45	G protein-coupled receptor 34 [Source:MGI Symbol;Acc:MGI:1346334]
Apbb1ip	7.59	7.17	7.41	8.07	9.37	8.02	7.15	7.98	7.89	7.23	7.36	6.72	1e-06	6.05e-05	1.81	1.59	-1.03	0.307	0.487	-0.298	-1.23	amyloid beta (A4) precursor protein-binding, family B, member 1 interacting protein [Source:MGI Symbol;Acc:MGI:1861354]
Ctsz	7.66	7.52	7.93	8	9.94	8.65	7.48	8.37	8.19	7.46	7.82	6.72	1e-06	6.05e-05	4.95	4.55	-2.43	0.0185	0.0776	-0.448	-1.36	cathepsin Z [Source:MGI Symbol;Acc:MGI:1891190]
Mafb	7.53	7.28	7.57	8.01	9.45	8.49	7.3	7.94	8.11	7.25	7.45	6.69	1e-06	6.05e-05	2.75	2.51	-2.3	0.0258	0.0951	-0.465	-1.38	v-maf musculoaponeurotic fibrosarcoma oncogene family, protein B (avian) [Source:MGI Symbol;Acc:MGI:104555]
4632428N05Rik	7.53	7.4	7.41	8.05	9.21	8.09	7.23	7.89	8.05	7.22	7.27	6.37	1e-06	6.05e-05	4.54	4.43	-0.37	0.713	0.824	-0.0545	-1.04	RIKEN cDNA 4632428N05 gene [Source:MGI Symbol;Acc:MGI:1921298]
Ptpn18	7.52	7.28	7.63	7.96	9.23	8.08	7.13	7.92	7.89	7.24	7.22	6.34	1e-06	6.05e-05	0.178	-0.204	-1.11	0.272	0.449	-0.561	-1.48	protein tyrosine phosphatase, non-receptor type 18 [Source:MGI Symbol;Acc:MGI:108410]
Pld4	7.52	7.17	7.44	7.97	9.26	8.15	7.13	8	7.89	7.22	7.25	6.3	1e-06	6.05e-05	1.58	1.39	-1.67	0.101	0.233	-0.532	-1.45	phospholipase D family, member 4 [Source:MGI Symbol;Acc:MGI:2144765]
Cyth4	7.52	7.19	7.41	7.97	9.18	8.09	7.14	7.89	7.89	7.22	7.21	6.28	1e-06	6.05e-05	2.45	2.3	-0.904	0.37	0.55	-0.261	-1.2	cytohesin 4 [Source:MGI Symbol;Acc:MGI:2441702]
Fcgr2b	7.52	7.17	7.3	7.96	9.21	8.33	7.17	7.94	7.9	7.22	7.21	6.22	1e-06	6.05e-05	2.12	2.01	-0.818	0.417	0.596	-0.204	-1.15	Fc receptor, IgG, low affinity IIb [Source:MGI Symbol;Acc:MGI:95499]
Tmem119	7.52	7.19	7.36	7.97	9.18	8.18	7.13	7.92	7.89	7.22	7.21	6.16	1e-06	6.05e-05	2.82	2.37	-2.26	0.0278	0.0995	-0.708	-1.63	transmembrane protein 119 [Source:MGI Symbol;Acc:MGI:2385228]
Lair1	7.52	7.17	7.41	7.98	9.2	8.03	7.17	7.95	7.92	7.22	7.21	6.08	1e-06	6.05e-05	3.05	3.2	0.118	0.907	0.946	0.0218	1.02	leukocyte-associated Ig-like receptor 1 [Source:MGI Symbol;Acc:MGI:105492]
Lpcat2	7.67	7.17	7.3	8.29	9.17	8.03	7.34	7.89	7.97	7.23	7.33	6.05	1e-06	6.05e-05	2.84	2.94	0.0664	0.947	0.971	0.0133	1.01	lysophosphatidylcholine acyltransferase 2 [Source:MGI Symbol;Acc:MGI:3606214]
Rps9	9.68	9.76	9.73	9.69	11.4	10.4	9.29	9.06	10.4	9.54	10.5	6.04	1e-06	6.05e-05	6.49	6.14	-2.01	0.05	0.146	-0.486	-1.4	ribosomal protein S9 [Source:MGI Symbol;Acc:MGI:1924096]
Man2b1	7.64	7.44	7.47	8.08	9.26	8.12	7.25	7.98	7.94	7.3	7.36	6.01	1e-06	6.05e-05	5.68	5.4	-2.83	0.00668	0.041	-0.378	-1.3	mannosidase 2, alpha B1 [Source:MGI Symbol;Acc:MGI:107286]
Tmsb4x	11.5	12.3	12	10.5	14	10.2	9.34	9.45	9.47	9.88	9.39	5.91	1e-06	6.05e-05	8.45	8.15	-0.382	0.704	0.817	-0.0635	-1.05	thymosin, beta 4, X chromosome [Source:MGI Symbol;Acc:MGI:99510]
Arpc1b	8.71	8.84	8.65	7.97	9.97	8.61	7.24	8.03	7.99	7.24	7.56	5.84	1e-06	6.05e-05	3.15	2.6	-2.55	0.0139	0.0644	-0.649	-1.57	actin related protein 2/3 complex, subunit 1B [Source:MGI Symbol;Acc:MGI:1343142]
Tgfbr1	7.58	7.28	7.41	8.01	9.2	8.16	7.17	8	7.96	7.26	7.39	5.84	1e-06	6.05e-05	5.18	5.71	3.28	0.00186	0.0204	0.532	1.45	transforming growth factor, beta receptor I [Source:MGI Symbol;Acc:MGI:98728]
Pabpc1	9.19	9.7	9.92	9.38	11.6	9.7	8.59	8.91	9.31	8.59	10.6	5.83	1e-06	6.05e-05	6.85	6.79	-1.31	0.195	0.36	-0.174	-1.13	poly(A) binding protein, cytoplasmic 1 [Source:MGI Symbol;Acc:MGI:1349722]
Ltc4s	7.52	7.21	7.3	7.97	9.01	8.08	7.13	7.84	7.89	7.22	7.21	5.82	1e-06	6.05e-05	-0.284	-0.683	-1.16	0.25	0.424	-0.791	-1.73	leukotriene C4 synthase [Source:MGI Symbol;Acc:MGI:107498]
Cd68	7.52	7.2	7.41	7.96	9.12	8.08	7.14	7.92	7.91	7.22	7.26	5.81	1e-06	6.05e-05	1.04	0.351	-1.76	0.0849	0.209	-0.697	-1.62	CD68 antigen [Source:MGI Symbol;Acc:MGI:88342]
Rgs2	7.62	7.26	7.6	8.04	9.63	8.12	7.6	8.09	8.25	8.78	8.28	5.76	1e-06	6.05e-05	6.85	6.44	-1.93	0.0597	0.164	-0.269	-1.2	regulator of G-protein signaling 2 [Source:MGI Symbol;Acc:MGI:1098271]
Lcp1	7.56	7.41	7.55	7.96	9.14	8.08	7.13	7.98	7.89	7.22	7.26	5.74	1e-06	6.05e-05	2.98	3.12	0.0594	0.953	0.974	0.0115	1.01	lymphocyte cytosolic protein 1 [Source:MGI Symbol;Acc:MGI:104808]
Hpgds	7.52	7.17	7.47	7.97	9.14	8.07	7.13	7.98	7.89	7.22	7.22	5.74	1e-06	6.05e-05	2.31	2.45	1.42	0.162	0.319	0.42	1.34	hematopoietic prostaglandin D synthase [Source:MGI Symbol;Acc:MGI:1859384]
Sh3bgrl3	8.34	8.4	8.46	8.26	10.1	8.56	7.6	8.25	8.74	8.14	7.85	5.68	1e-06	6.05e-05	4.82	4.5	-1.31	0.197	0.363	-0.329	-1.26	SH3 domain binding glutamic acid-rich protein-like 3 [Source:MGI Symbol;Acc:MGI:1920973]
Ctsb	9.34	7.96	8.61	9.06	11.6	9.85	8.18	10.2	9.35	9.36	9.15	5.65	1e-06	6.05e-05	9.09	8.77	-3.27	0.00193	0.0208	-0.4	-1.32	cathepsin B [Source:MGI Symbol;Acc:MGI:88561]
AF251705	7.52	7.17	7.3	7.96	9.03	8.03	7.13	7.92	7.89	7.22	7.21	5.54	1e-06	6.05e-05	1.22	1.49	0.344	0.733	0.837	0.124	1.09	cDNA sequence AF251705 [Source:MGI Symbol;Acc:MGI:2153249]
C3ar1	7.52	7.17	7.38	7.97	9.04	8.13	7.14	7.89	7.89	7.22	7.21	5.49	1e-06	6.05e-05	1.47	1.41	0.167	0.868	0.923	0.0384	1.03	complement component 3a receptor 1 [Source:MGI Symbol;Acc:MGI:1097680]
Itgb5	7.52	7.19	7.58	7.96	9.43	8.31	7.3	8.25	8.28	7.22	7.52	5.41	1e-06	6.05e-05	5.35	5.01	-2.79	0.00737	0.0437	-0.466	-1.38	integrin beta 5 [Source:MGI Symbol;Acc:MGI:96614]
Plek	7.52	7.17	7.45	7.97	9.08	8.1	7.14	7.95	7.91	7.27	7.26	5.33	1e-06	6.05e-05	3.77	4.25	3.22	0.0022	0.0223	0.677	1.6	pleckstrin [Source:MGI Symbol;Acc:MGI:1860485]
Cd74	7.53	7.17	7.36	7.96	8.98	8.11	7.13	7.84	7.9	7.22	7.39	5.29	1e-06	6.05e-05	1.13	0.847	-0.507	0.614	0.754	-0.287	-1.22	CD74 antigen (invariant polypeptide of major histocompatibility complex, class II antigen-associated) [Source:MGI Symbol;Acc:MGI:96534]
Ctsc	7.52	7.41	7.36	7.97	9.07	8.23	7.14	7.98	7.91	7.22	7.24	5.28	1e-06	6.05e-05	1.59	1.87	0.108	0.914	0.951	0.0318	1.02	cathepsin C [Source:MGI Symbol;Acc:MGI:109553]
Irf8	7.52	7.17	7.3	7.96	8.97	8.22	7.14	7.89	7.9	7.22	7.26	5.27	1e-06	6.05e-05	1.21	0.659	-2.8	0.00709	0.0426	-0.877	-1.84	interferon regulatory factor 8 [Source:MGI Symbol;Acc:MGI:96395]
Hpgd	7.54	7.17	7.41	7.98	9.16	8.34	7.13	8.01	7.91	7.24	7.49	5.17	1e-06	6.05e-05	1.37	1.22	0.297	0.768	0.86	0.0803	1.06	hydroxyprostaglandin dehydrogenase 15 (NAD) [Source:MGI Symbol;Acc:MGI:108085]
Fcgr1	7.52	7.19	7.36	7.97	8.91	8.1	7.13	7.84	7.89	7.22	7.21	5.15	1e-06	6.05e-05	-0.0449	-0.723	-0.848	0.4	0.58	-0.507	-1.42	Fc receptor, IgG, high affinity I [Source:MGI Symbol;Acc:MGI:95498]
Ppfia4	7.54	7.17	7.36	7.97	8.97	8.05	7.21	7.89	7.9	7.34	7.23	5.12	1e-06	6.05e-05	7.67	7.43	-1.27	0.21	0.378	-0.17	-1.13	protein tyrosine phosphatase, receptor type, f polypeptide (PTPRF), interacting protein (liprin), alpha 4 [Source:MGI Symbol;Acc:MGI:1915757]
Maf	7.53	7.28	7.56	8.01	9.94	9.22	7.81	8.11	8.62	7.26	7.67	5.08	1e-06	6.05e-05	3.7	3.88	1.85	0.0702	0.183	0.383	1.3	avian musculoaponeurotic fibrosarcoma (v-maf) AS42 oncogene homolog [Source:MGI Symbol;Acc:MGI:96909]
Arhgdib	7.52	7.53	8	7.97	9.09	8.12	7.14	7.84	7.89	7.22	7.29	5.04	1e-06	6.05e-05	1.97	1.87	-0.299	0.766	0.858	-0.0845	-1.06	Rho, GDP dissociation inhibitor (GDI) beta [Source:MGI Symbol;Acc:MGI:101940]
Asah1	7.81	7.53	7.66	8.27	9.06	8.31	7.36	7.94	8.14	7.52	7.93	4.97	1e-06	6.05e-05	5.42	5.54	0.521	0.605	0.747	0.0705	1.05	N-acylsphingosine amidohydrolase 1 [Source:MGI Symbol;Acc:MGI:1277124]
Ptgs1	7.52	7.17	7.58	7.97	8.85	8.04	7.13	7.84	7.9	7.22	7.25	4.97	1e-06	6.05e-05	2.58	2.63	-0.139	0.89	0.936	-0.0311	-1.02	prostaglandin-endoperoxide synthase 1 [Source:MGI Symbol;Acc:MGI:97797]
Kctd12	7.52	7.62	7.66	7.97	9.17	8.33	7.51	8.09	8.18	7.27	7.28	4.94	1e-06	6.05e-05	5.02	4.92	0.53	0.599	0.742	0.12	1.09	potassium channel tetramerisation domain containing 12 [Source:MGI Symbol;Acc:MGI:2145823]
Npc2	9.26	8.07	8.09	8.58	10.8	9.25	7.84	9.38	8.94	8.14	8.56	4.89	1e-06	6.05e-05	5.17	4.69	-3.1	0.00317	0.027	-0.569	-1.48	Niemann-Pick type C2 [Source:MGI Symbol;Acc:MGI:1915213]
Pycard	7.53	7.21	7.36	7.99	8.91	8.08	7.15	7.89	7.94	7.23	7.38	4.84	1e-06	6.05e-05	0.551	0.872	-0.186	0.854	0.915	-0.0663	-1.05	PYD and CARD domain containing [Source:MGI Symbol;Acc:MGI:1931465]
Lyn	7.52	7.55	7.6	8	8.8	8.13	7.14	7.84	7.89	7.22	7.25	4.78	1e-06	6.05e-05	2.54	2.83	1.26	0.212	0.38	0.266	1.2	Yamaguchi sarcoma viral (v-yes-1) oncogene homolog [Source:MGI Symbol;Acc:MGI:96892]
Ctsa	8.15	7.6	7.55	8.11	9.51	8.44	7.51	8.34	8.1	7.54	7.69	4.76	1e-06	6.05e-05	5.94	5.67	-2.37	0.0216	0.0853	-0.524	-1.44	cathepsin A [Source:MGI Symbol;Acc:MGI:97748]
Rps11	8.56	8.83	9.03	8.88	10.3	9.43	8	8.67	9.05	8.9	8.97	4.66	1e-06	6.05e-05	6.64	6.43	-1.32	0.193	0.358	-0.39	-1.31	ribosomal protein S11 [Source:MGI Symbol;Acc:MGI:1351329]
Lgals3bp	7.52	7.54	7.63	7.97	9.2	8.49	7.33	8.12	8.03	7.44	8.45	4.64	1e-06	6.05e-05	4.31	4.08	-1.71	0.0941	0.223	-0.409	-1.33	lectin, galactoside-binding, soluble, 3 binding protein [Source:MGI Symbol;Acc:MGI:99554]
Ptprc	7.52	7.21	7.45	7.97	8.9	8.05	7.13	7.95	7.89	7.22	7.22	4.62	1e-06	6.05e-05	1.17	1.14	-0.604	0.549	0.703	-0.212	-1.16	protein tyrosine phosphatase, receptor type, C [Source:MGI Symbol;Acc:MGI:97810]
Efhd2	7.53	7.26	7.63	7.97	9.25	8.18	7.19	8.17	8.07	7.61	7.42	4.61	1e-06	6.05e-05	6.83	6.67	-1.08	0.286	0.464	-0.215	-1.16	EF hand domain containing 2 [Source:MGI Symbol;Acc:MGI:106504]
Rpl32	9.16	9.52	9.91	9.47	11.2	9.89	8.61	9.22	9.68	9.63	9.78	4.59	1e-06	6.05e-05	6.18	5.64	-2.41	0.0197	0.0808	-0.6	-1.52	ribosomal protein L32 [Source:MGI Symbol;Acc:MGI:98038]
Hcls1	7.52	7.21	7.36	7.97	8.77	8.09	7.13	7.84	7.89	7.22	7.21	4.56	1e-06	6.05e-05	1.05	0.428	-2.22	0.0305	0.106	-0.835	-1.78	hematopoietic cell specific Lyn substrate 1 [Source:MGI Symbol;Acc:MGI:104568]
Fam105a	7.52	7.17	7.36	7.99	8.84	8.26	7.13	7.89	7.89	7.34	7.24	4.56	1e-06	6.05e-05	3.09	3.14	0.71	0.481	0.65	0.128	1.09	family with sequence similarity 105, member A [Source:MGI Symbol;Acc:MGI:2687281]
Rplp1	9.92	10.3	11.1	9.99	12.3	11.1	9.83	9.67	10.8	9.91	10.9	4.52	1e-06	6.05e-05	7.2	6.69	-1.62	0.111	0.249	-0.385	-1.31	ribosomal protein, large, P1 [Source:MGI Symbol;Acc:MGI:1927099]
H2-DMa	7.53	7.19	7.3	7.98	8.81	8.06	7.21	7.89	7.93	7.27	7.29	4.5	1e-06	6.05e-05	2.77	2.59	-1.34	0.186	0.349	-0.307	-1.24	histocompatibility 2, class II, locus DMa [Source:MGI Symbol;Acc:MGI:95921]
Cotl1	7.57	7.19	7.3	8.28	9.24	8.29	8.22	8.21	8.42	7.68	7.42	4.48	1e-06	6.05e-05	5.97	5.36	-3.08	0.00328	0.0275	-0.628	-1.55	coactosin-like 1 (Dictyostelium) [Source:MGI Symbol;Acc:MGI:1919292]
Smap2	7.97	7.46	7.45	8.3	8.99	8.24	7.41	7.95	8.02	8.18	7.54	4.47	1e-06	6.05e-05	7.35	7.21	-2	0.0503	0.147	-0.173	-1.13	small ArfGAP 2 [Source:MGI Symbol;Acc:MGI:1917030]
Capza2	8.4	8.33	8.29	8.83	9.84	8.69	7.95	8.67	8.6	8.6	8.32	4.47	1e-06	6.05e-05	7.54	7.73	2.13	0.0382	0.123	0.275	1.21	capping protein (actin filament) muscle Z-line, alpha 2 [Source:MGI Symbol;Acc:MGI:106222]
B2m	7.92	11.3	11.7	8.98	13.1	11.1	7.53	9.53	8.94	7.79	8.43	4.46	1e-06	6.05e-05	5.58	5.67	0.249	0.805	0.883	0.0406	1.03	beta-2 microglobulin [Source:MGI Symbol;Acc:MGI:88127]
Ntpcr	7.66	7.17	7.38	8.04	8.92	8.12	7.3	7.95	7.98	7.41	7.44	4.44	1e-06	6.05e-05	4	3.75	-1.31	0.196	0.362	-0.236	-1.18	nucleoside-triphosphatase, cancer-related [Source:MGI Symbol;Acc:MGI:1913816]
Spi1	7.52	7.17	7.3	7.96	8.8	8.04	7.13	7.89	7.89	7.22	7.21	4.35	1e-06	6.05e-05	-0.0709	-0.912	-1.64	0.107	0.243	-0.809	-1.75	spleen focus forming virus (SFFV) proviral integration oncogene [Source:MGI Symbol;Acc:MGI:98282]
Serinc3	8.05	9.07	9.41	8.1	10.4	8.97	8.11	8.36	8.21	7.67	7.67	4.32	1e-06	6.05e-05	8.46	8.72	2.53	0.0145	0.0661	0.263	1.2	serine incorporator 3 [Source:MGI Symbol;Acc:MGI:1349457]
Ncf1	7.52	7.17	7.36	7.97	8.86	8.1	7.13	7.95	7.89	7.23	7.23	4.3	1e-06	6.05e-05	2.3	2.22	-0.968	0.338	0.518	-0.22	-1.16	neutrophil cytosolic factor 1 [Source:MGI Symbol;Acc:MGI:97283]
Rps10	8.87	8.97	9.26	9.05	10.4	9.62	8.68	8.84	9.41	8.96	9.55	4.27	1e-06	6.05e-05	5.75	5.15	-1.81	0.0765	0.194	-0.707	-1.63	ribosomal protein S10 [Source:MGI Symbol;Acc:MGI:1914347]
Frmd4a	8.23	7.24	7.47	8.14	8.78	8.13	7.35	7.84	7.96	7.42	7.36	4.23	1e-06	6.05e-05	6.33	6.26	0.111	0.912	0.95	0.012	1.01	FERM domain containing 4A [Source:MGI Symbol;Acc:MGI:1919850]
Ms4a6c	7.52	7.17	7.3	7.96	8.71	8.17	7.13	7.84	7.89	7.22	7.21	4.21	1e-06	6.05e-05	-1.69	-1.08	0.0109	0.991	0.996	0.00711	1	membrane-spanning 4-domains, subfamily A, member 6C [Source:MGI Symbol;Acc:MGI:2385644]
Hexa	7.76	7.43	7.87	8.16	9.58	8.72	7.63	8.53	8.25	7.66	7.96	4.19	1e-06	6.05e-05	5.67	5.33	-2.74	0.00844	0.0473	-0.432	-1.35	hexosaminidase A [Source:MGI Symbol;Acc:MGI:96073]
Rnase4	7.53	7.6	7.71	7.98	9.8	8.87	9.26	7.92	8.38	7.23	7.6	4.18	1e-06	6.05e-05	3.86	3.83	-0.39	0.698	0.813	-0.0834	-1.06	ribonuclease, RNase A family 4 [Source:MGI Symbol;Acc:MGI:1926217]
Ptpn6	7.52	7.19	7.36	7.97	8.7	8.09	7.15	7.84	7.89	7.22	7.45	4.13	1e-06	6.05e-05	1.21	0.724	-2.07	0.043	0.132	-0.706	-1.63	protein tyrosine phosphatase, non-receptor type 6 [Source:MGI Symbol;Acc:MGI:96055]
Adap2	7.52	7.19	7.76	7.96	8.7	8.11	7.13	7.84	7.89	7.22	7.21	4.1	1e-06	6.05e-05	2.65	2.69	-0.907	0.368	0.549	-0.147	-1.11	ArfGAP with dual PH domains 2 [Source:MGI Symbol;Acc:MGI:2663075]
Grb2	8.3	7.79	7.9	8.42	9.11	8.44	7.78	8.2	8.47	8.7	8.2	4.09	1e-06	6.05e-05	7.05	6.86	-1.79	0.0799	0.2	-0.196	-1.15	growth factor receptor bound protein 2 [Source:MGI Symbol;Acc:MGI:95805]
Cd84	7.52	7.17	7.36	7.96	8.74	8.07	7.13	7.89	7.89	7.22	7.21	4.07	1e-06	6.05e-05	1.12	1.49	0.212	0.833	0.902	0.0851	1.06	CD84 antigen [Source:MGI Symbol;Acc:MGI:1336885]
Eef1b2	8.8	8.92	9.06	9.09	10.1	9.42	8.27	8.68	9.17	9.12	9.13	4.03	1e-06	6.05e-05	7.04	6.38	-2.79	0.00733	0.0436	-0.556	-1.47	eukaryotic translation elongation factor 1 beta 2 [Source:MGI Symbol;Acc:MGI:1929520]
Gnb2l1	8.84	9.37	9.41	9.22	10.5	9.76	8.41	9.01	9.31	8.98	9.56	4.03	1e-06	6.05e-05	6.89	6.44	-2.41	0.0196	0.0805	-0.538	-1.45	guanine nucleotide binding protein (G protein), beta polypeptide 2 like 1 [Source:MGI Symbol;Acc:MGI:101849]
Actb	12.3	11.9	12	12.3	13	11.1	11	11	11	10.7	11.3	4	1e-06	6.05e-05	9.83	9.77	-0.604	0.548	0.703	-0.0861	-1.06	actin, beta [Source:MGI Symbol;Acc:MGI:87904]
Alox5ap	7.52	7.17	7.3	7.98	8.64	8.1	7.14	7.84	7.89	7.29	7.23	3.97	1e-06	6.05e-05	1.19	0.669	-2.92	0.00515	0.0354	-1.12	-2.18	arachidonate 5-lipoxygenase activating protein [Source:MGI Symbol;Acc:MGI:107505]
Ncf2	7.54	7.21	7.3	7.97	8.68	8.07	7.17	7.89	7.9	7.22	7.21	3.94	1e-06	6.05e-05	1.06	0.866	-0.594	0.555	0.708	-0.175	-1.13	neutrophil cytosolic factor 2 [Source:MGI Symbol;Acc:MGI:97284]
Gm9843	8.08	8.21	8.62	8.36	9.71	8.76	7.69	8.3	8.54	8.17	8.41	3.94	1e-06	6.05e-05	-0.333	-0.729	-1.14	0.261	0.437	-0.72	-1.65	predicted gene 9843 [Source:MGI Symbol;Acc:MGI:3708621]
Zfhx3	7.55	7.26	7.76	8.06	8.92	8.09	7.27	8.03	7.98	7.74	8.17	3.91	1e-06	6.05e-05	7.29	7.66	2.1	0.0409	0.128	0.65	1.57	zinc finger homeobox 3 [Source:MGI Symbol;Acc:MGI:99948]
Cybb	7.52	7.17	7.41	7.96	8.66	8.1	7.13	7.84	7.89	7.22	7.21	3.88	1e-06	6.05e-05	-1.53	-1.69	-0.572	0.57	0.72	-0.363	-1.29	cytochrome b-245, beta polypeptide [Source:MGI Symbol;Acc:MGI:88574]
Pde3b	7.56	7.17	7.4	8.02	8.65	8	7.15	7.84	7.9	7.28	7.22	3.87	1e-06	6.05e-05	3.59	3.96	1.45	0.153	0.307	0.281	1.22	phosphodiesterase 3B, cGMP-inhibited [Source:MGI Symbol;Acc:MGI:1333863]
Golm1	7.54	7.6	8.11	8.08	9.04	8.1	7.17	8.09	7.94	7.25	7.4	3.86	1e-06	6.05e-05	3.83	3.94	0.552	0.583	0.731	0.119	1.09	golgi membrane protein 1 [Source:MGI Symbol;Acc:MGI:1917329]
Slc11a1	7.52	7.17	7.3	7.97	8.72	8	7.13	7.89	7.89	7.22	7.21	3.85	1e-06	6.05e-05	1.23	0.857	-1.64	0.108	0.244	-0.46	-1.38	solute carrier family 11 (proton-coupled divalent metal ion transporters), member 1 [Source:MGI Symbol;Acc:MGI:1345275]
Coro1a	7.52	7.19	7.3	8.01	8.73	8.05	7.13	7.89	7.89	7.38	7.21	3.82	1e-06	6.05e-05	5.81	5.14	-2.82	0.00681	0.0415	-0.646	-1.56	coronin, actin binding protein 1A [Source:MGI Symbol;Acc:MGI:1345961]
Il6ra	7.52	7.56	7.47	7.98	8.65	8.19	7.5	7.89	7.9	7.22	7.26	3.82	1e-06	6.05e-05	3.53	3.65	1.36	0.181	0.344	0.218	1.16	interleukin 6 receptor, alpha [Source:MGI Symbol;Acc:MGI:105304]
Syngr2	7.71	7.45	7.58	8	8.71	8.1	7.25	7.92	8.02	7.27	7.48	3.81	1e-06	6.05e-05	3.49	3.75	1.73	0.0899	0.217	0.424	1.34	synaptogyrin 2 [Source:MGI Symbol;Acc:MGI:1328324]
Fam49b	8.04	7.31	7.36	8.4	9.01	8.09	7.34	8.15	8.04	7.95	7.39	3.8	1e-06	6.05e-05	6.96	7.1	1.75	0.0857	0.21	0.218	1.16	family with sequence similarity 49, member B [Source:MGI Symbol;Acc:MGI:1923520]
Slco2b1	7.52	7.81	7.66	7.96	8.65	8.13	7.14	7.89	7.89	7.22	7.22	3.8	1e-06	6.05e-05	3.63	3.6	-1.43	0.159	0.315	-0.263	-1.2	solute carrier organic anion transporter family, member 2b1 [Source:MGI Symbol;Acc:MGI:1351872]
Rplp2	8.85	8.88	9.57	9.06	10.7	9.45	8.83	8.37	9.48	9.23	9.32	3.8	1e-06	6.05e-05	5.01	4.41	-1.69	0.0962	0.227	-0.766	-1.7	ribosomal protein, large P2 [Source:MGI Symbol;Acc:MGI:1914436]
Rpl37	8.32	8.44	8.99	8.71	9.9	9.13	8.09	8.4	8.95	8.72	8.98	3.79	1e-06	6.05e-05	4.88	4.52	-1.54	0.13	0.276	-0.806	-1.75	ribosomal protein L37 [Source:MGI Symbol;Acc:MGI:1914531]
Pou2f2	7.53	7.19	7.36	8.01	8.68	8.03	7.14	7.84	7.9	7.54	7.24	3.78	1e-06	6.05e-05	4.71	4.48	-1.62	0.112	0.251	-0.235	-1.18	POU domain, class 2, transcription factor 2 [Source:MGI Symbol;Acc:MGI:101897]
Mbnl1	7.85	7.92	8.45	8.2	9.37	8.61	7.54	8.37	8.1	7.66	7.63	3.78	1e-06	6.05e-05	6.39	6.98	3.72	0.000499	0.011	0.707	1.63	muscleblind-like 1 (Drosophila) [Source:MGI Symbol;Acc:MGI:1928482]
Mylip	7.52	7.36	7.94	8	8.94	8.43	7.14	7.98	7.93	7.26	7.74	3.78	1e-06	6.05e-05	4.11	4.17	0.37	0.713	0.824	0.0551	1.04	myosin regulatory light chain interacting protein [Source:MGI Symbol;Acc:MGI:2388271]
Crybb1	7.52	7.19	7.3	7.97	8.57	8	7.13	7.84	7.93	7.22	7.21	3.67	1e-06	6.05e-05	-0.395	-0.77	-0.68	0.5	0.665	-0.458	-1.37	crystallin, beta B1 [Source:MGI Symbol;Acc:MGI:104992]
Rps15a	8.55	8.75	9.08	8.92	10	9.17	8.17	8.54	9.18	8.7	9.05	3.62	1e-06	6.05e-05	6.95	6.87	-0.752	0.455	0.628	-0.0839	-1.06	ribosomal protein S15A [Source:MGI Symbol;Acc:MGI:2389091]
Fam111a	7.52	7.28	7.44	8.1	8.58	8.08	7.13	7.84	7.89	7.23	7.23	3.61	1e-06	6.05e-05	0.231	0.635	0.781	0.438	0.614	0.33	1.26	family with sequence similarity 111, member A [Source:MGI Symbol;Acc:MGI:1915508]
Eef1a1	9.11	9.01	9.07	9.21	10.1	9.51	8.11	8.72	9.44	9.39	9.57	3.6	1e-06	6.05e-05	11.2	10.9	-1.39	0.17	0.329	-0.143	-1.1	eukaryotic translation elongation factor 1 alpha 1 [Source:MGI Symbol;Acc:MGI:1096881]
Ighm	7.52	7.17	7.3	7.97	8.59	8.06	7.13	7.84	7.89	7.27	7.22	3.6	1e-06	6.05e-05	2.45	2.69	0.423	0.674	0.796	0.141	1.1	immunoglobulin heavy constant mu [Source:MGI Symbol;Acc:MGI:96448]
Creg1	7.68	7.52	7.57	8.26	9.16	8.35	7.69	8.27	8.12	7.73	7.89	3.59	1e-06	6.05e-05	5.29	5.12	-1.2	0.235	0.407	-0.143	-1.1	cellular repressor of E1A-stimulated genes 1 [Source:MGI Symbol;Acc:MGI:1344382]
Rpl26	9.12	9.81	10	9.25	10.9	10	8.99	8.91	9.72	9.53	9.97	3.56	1e-06	6.05e-05	5.65	4.95	-2.46	0.0175	0.0748	-0.609	-1.53	ribosomal protein L26 [Source:MGI Symbol;Acc:MGI:106022]
Hk2	7.53	7.17	7.3	7.96	8.75	8.02	7.16	8.02	7.9	7.23	7.31	3.54	1e-06	6.05e-05	3.29	3.21	-0.958	0.343	0.523	-0.158	-1.12	hexokinase 2 [Source:MGI Symbol;Acc:MGI:1315197]
Rnf130	8.46	7.77	7.97	8.05	8.91	8.39	7.56	8.12	8.22	7.43	7.51	3.52	1e-06	6.05e-05	5.46	5.6	1.36	0.179	0.341	0.162	1.12	ring finger protein 130 [Source:MGI Symbol;Acc:MGI:1891717]
Snx5	8.15	7.45	7.52	8.32	9.34	8.28	7.76	8.43	8.37	7.45	7.73	3.52	1e-06	6.05e-05	7.04	7.18	1.66	0.102	0.236	0.165	1.12	sorting nexin 5 [Source:MGI Symbol;Acc:MGI:1916428]
Rps6ka1	7.55	7.48	7.36	7.97	8.65	8	7.16	7.89	7.89	7.26	7.29	3.51	1e-06	6.05e-05	4.25	4.03	-1.81	0.0768	0.195	-0.305	-1.24	ribosomal protein S6 kinase polypeptide 1 [Source:MGI Symbol;Acc:MGI:104558]
Prkcd	7.52	7.31	7.36	7.97	8.59	8.14	7.17	7.89	7.92	7.22	7.46	3.51	1e-06	6.05e-05	5.72	5.73	0.625	0.535	0.692	0.281	1.22	protein kinase C, delta [Source:MGI Symbol;Acc:MGI:97598]
Ms4a6b	7.52	7.17	7.3	7.96	8.62	8.15	7.13	7.89	7.89	7.22	7.21	3.51	1e-06	6.05e-05	0.312	0.376	-0.73	0.469	0.64	-0.366	-1.29	membrane-spanning 4-domains, subfamily A, member 6B [Source:MGI Symbol;Acc:MGI:1917024]
Capzb	8.42	8.2	8.55	8.71	9.55	8.94	8.45	8.57	8.71	8.72	8.51	3.5	1e-06	6.05e-05	7.41	7.05	-2.32	0.0244	0.0919	-0.388	-1.31	capping protein (actin filament) muscle Z-line, beta [Source:MGI Symbol;Acc:MGI:104652]
Slfn2	7.52	7.28	7.58	7.96	8.63	8.18	7.13	7.92	7.89	7.22	7.26	3.46	1e-06	6.05e-05	-1.89	-1.71	-0.625	0.535	0.692	-0.42	-1.34	schlafen 2 [Source:MGI Symbol;Acc:MGI:1313258]
Sat1	7.82	7.75	8.36	8.26	9.57	8.55	8.11	8.65	8.86	7.38	8.42	3.43	1e-06	6.05e-05	6.25	6.12	0.161	0.873	0.926	0.0206	1.01	spermidine/spermine N1-acetyl transferase 1 [Source:MGI Symbol;Acc:MGI:98233]
Gngt2	7.52	7.17	7.85	7.96	8.61	8.02	7.13	7.84	7.89	7.22	7.21	3.39	1e-06	6.05e-05	1.17	0.595	-1.54	0.13	0.275	-0.587	-1.5	guanine nucleotide binding protein (G protein), gamma transducing activity polypeptide 2 [Source:MGI Symbol;Acc:MGI:893584]
Sh3kbp1	7.91	7.37	7.63	8.18	8.7	8.19	7.25	7.95	8.02	7.72	7.38	3.36	1e-06	6.05e-05	6	6.14	1.32	0.192	0.356	0.157	1.12	SH3-domain kinase binding protein 1 [Source:MGI Symbol;Acc:MGI:1889583]
Rps26	9.22	8.77	9.32	9.48	10.4	9.84	8.24	8.39	9.38	9.14	9.3	3.33	1e-06	6.05e-05	3.91	3.25	-1.97	0.0544	0.155	-0.879	-1.84	ribosomal protein S26 [Source:MGI Symbol;Acc:MGI:1351628]
Rps25	7.83	7.77	8.1	8.26	8.97	8.4	7.68	8.06	8.32	7.97	8.04	3.3	1e-06	6.05e-05	6.02	5.44	-2.17	0.035	0.115	-0.463	-1.38	ribosomal protein S25 [Source:MGI Symbol;Acc:MGI:1922867]
Prcp	7.57	7.33	7.36	7.98	8.53	8.11	7.15	7.84	7.91	7.26	7.38	3.24	1e-06	6.05e-05	3.02	3.2	0.66	0.512	0.675	0.119	1.09	prolylcarboxypeptidase (angiotensinase C) [Source:MGI Symbol;Acc:MGI:1919711]
Camk1	7.71	7.46	7.75	8.37	8.83	8.28	7.49	8.03	8.12	7.94	7.63	3.23	1e-06	6.05e-05	6.43	6.05	-2.66	0.0104	0.0541	-0.366	-1.29	calcium/calmodulin-dependent protein kinase I [Source:MGI Symbol;Acc:MGI:1098535]
Cap1	8.3	7.48	7.86	8.18	8.85	8.3	7.49	8.16	8.16	7.61	7.67	3.15	1e-06	6.05e-05	7	6.72	-2.66	0.0105	0.0541	-0.331	-1.26	CAP, adenylate cyclase-associated protein 1 (yeast) [Source:MGI Symbol;Acc:MGI:88262]
Cd83	7.53	7.38	7.41	8.04	8.62	8.07	7.37	7.89	7.93	7.56	7.22	3.15	1e-06	6.05e-05	6.52	6.45	0.577	0.566	0.717	0.148	1.11	CD83 antigen [Source:MGI Symbol;Acc:MGI:1328316]
Mef2a	7.83	8.32	8.34	8.13	9.14	8.54	7.49	8.06	8.12	7.65	8.4	3.14	1e-06	6.05e-05	6.81	7.22	2.93	0.00507	0.0352	0.487	1.4	myocyte enhancer factor 2A [Source:MGI Symbol;Acc:MGI:99532]
Ssh2	7.58	7.31	7.51	8.03	8.62	8.23	7.2	7.89	7.91	7.31	7.33	3.13	1e-06	6.05e-05	6.05	6.4	3.26	0.00196	0.021	0.419	1.34	slingshot homolog 2 (Drosophila) [Source:MGI Symbol;Acc:MGI:2679255]
Rplp0	8.81	9.12	9.86	9.03	10.7	9.98	8.82	9.14	9.61	8.42	9.12	3.13	1e-06	6.05e-05	6.64	6.23	-2.47	0.0169	0.0733	-0.454	-1.37	ribosomal protein, large, P0 [Source:MGI Symbol;Acc:MGI:1927636]
Pfn1	9.46	8.98	9.47	9.14	10.4	9.76	8.34	8.92	9.28	8.74	8.97	3.12	1e-06	6.05e-05	5.19	4.68	-2.33	0.0237	0.0901	-0.67	-1.59	profilin 1 [Source:MGI Symbol;Acc:MGI:97549]
Adgre1	7.52	7.17	7.36	7.96	8.59	8.1	7.13	7.95	7.89	7.22	7.21	3.1	1e-06	6.05e-05	0.448	0.986	0.57	0.571	0.722	0.214	1.16	adhesion G protein-coupled receptor E1 [Source:MGI Symbol;Acc:MGI:106912]
Tanc2	7.58	7.24	7.49	8.1	8.59	8.05	7.35	7.89	8	7.65	7.45	3.06	1e-06	6.05e-05	8.08	8.4	3.23	0.00214	0.0219	0.494	1.41	tetratricopeptide repeat, ankyrin repeat and coiled-coil containing 2 [Source:MGI Symbol;Acc:MGI:2444121]
Ptpn1	7.75	7.56	7.41	8.07	8.85	8.15	7.34	8.13	8.04	7.49	7.65	3.06	1e-06	6.05e-05	5.41	5.25	-1.02	0.31	0.49	-0.12	-1.09	protein tyrosine phosphatase, non-receptor type 1 [Source:MGI Symbol;Acc:MGI:97805]
Rps24	9.22	9.88	10.4	9.32	11.2	10.1	8.8	9.41	9.64	9.49	9.6	3.04	1e-06	6.05e-05	6.4	5.75	-2.82	0.00678	0.0415	-0.557	-1.47	ribosomal protein S24 [Source:MGI Symbol;Acc:MGI:98147]
Tlr2	7.52	7.19	7.41	7.97	8.58	8.07	7.14	7.89	7.94	7.22	7.25	3.03	1e-06	6.05e-05	2.05	2.18	0.714	0.478	0.648	0.173	1.13	toll-like receptor 2 [Source:MGI Symbol;Acc:MGI:1346060]
Rpl34	8.57	8.83	9.5	9.08	10.3	9.53	8.41	8.45	9.1	8.89	9.31	3.03	1e-06	6.05e-05	5.74	5.43	-1.31	0.194	0.36	-0.288	-1.22	ribosomal protein L34 [Source:MGI Symbol;Acc:MGI:1915686]
Zswim6	7.76	7.28	7.47	7.99	8.5	8.08	7.39	7.84	8.03	7.27	7.76	3.02	1e-06	6.05e-05	4.3	4.45	0.618	0.539	0.696	0.109	1.08	zinc finger SWIM-type containing 6 [Source:MGI Symbol;Acc:MGI:1914513]
Zeb2os	7.66	7.17	7.41	8	8.47	8	7.15	7.84	7.89	7.22	7.21	3.02	1e-06	6.05e-05	-1.18	-0.439	0.689	0.494	0.66	0.441	1.36	zinc finger E-box binding homeobox 2, opposite strand [Source:MGI Symbol;Acc:MGI:3652108]
Rpl18a	7.78	7.66	7.98	8.13	8.91	8.48	7.4	8.01	8.19	7.57	7.79	3.02	1e-06	6.05e-05	5.92	5.54	-2.24	0.0291	0.103	-0.376	-1.3	ribosomal protein L18A [Source:MGI Symbol;Acc:MGI:1924058]
Rpl13a	9.52	10.2	10.6	9.78	11.5	10.9	9.19	9.14	10.4	10.3	10.6	3.02	1e-06	6.05e-05	6.98	6.3	-2.17	0.0345	0.114	-0.7	-1.62	ribosomal protein L13A [Source:MGI Symbol;Acc:MGI:1351455]
Clic1	7.52	8.24	8.38	7.98	9.21	8.49	8.03	8.18	8.46	7.25	8.05	3.02	1e-06	6.05e-05	2.7	2.31	-2.47	0.0167	0.0725	-0.816	-1.76	chloride intracellular channel 1 [Source:MGI Symbol;Acc:MGI:2148924]
Cebpz	8.13	7.69	7.87	8.41	8.75	8.28	7.65	8.01	8.2	7.75	7.83	3	1e-06	6.05e-05	5.51	5.37	-0.766	0.447	0.622	-0.0838	-1.06	CCAAT/enhancer binding protein zeta [Source:MGI Symbol;Acc:MGI:109386]
Ppp1r18	7.64	7.31	7.74	8.16	8.55	8.12	7.13	7.89	7.9	7.22	7.24	3	1e-06	6.05e-05	2.71	2.48	-1.75	0.0867	0.212	-0.335	-1.26	protein phosphatase 1, regulatory subunit 18 [Source:MGI Symbol;Acc:MGI:1923698]
Tgif1	7.52	7.27	7.6	7.97	8.49	8.08	7.42	7.84	8.06	7.22	7.36	2.98	1e-06	6.05e-05	1.32	1.63	0.443	0.66	0.787	0.152	1.11	TGFB-induced factor homeobox 1 [Source:MGI Symbol;Acc:MGI:1194497]
Commd8	7.94	7.36	7.81	8.24	8.7	8.21	7.48	8.01	8.18	7.79	7.49	2.97	1e-06	6.05e-05	5.34	5.48	1.24	0.22	0.389	0.151	1.11	COMM domain containing 8 [Source:MGI Symbol;Acc:MGI:1343485]
Lcp2	7.52	7.17	7.36	7.97	8.47	8.06	7.13	7.84	7.89	7.25	7.21	2.95	1e-06	6.05e-05	1.79	1.89	1.28	0.206	0.373	0.35	1.27	lymphocyte cytosolic protein 2 [Source:MGI Symbol;Acc:MGI:1321402]
Rpl4	9.76	9.76	10	9.77	10.9	10.3	9.22	9.26	10.2	10.2	10.5	2.94	1e-06	6.05e-05	8.55	7.88	-3.35	0.00153	0.0187	-0.67	-1.59	ribosomal protein L4 [Source:MGI Symbol;Acc:MGI:1915141]
Vasp	7.57	7.43	7.93	8.04	8.61	8.22	7.23	7.84	7.98	7.29	7.48	2.91	1e-06	6.05e-05	2.88	2.7	-1.35	0.184	0.347	-0.277	-1.21	vasodilator-stimulated phosphoprotein [Source:MGI Symbol;Acc:MGI:109268]
Plekho1	7.54	7.19	7.74	8.05	8.57	8.08	7.13	8	7.92	7.26	7.28	2.89	1e-06	6.05e-05	3.59	3.45	-0.768	0.446	0.62	-0.147	-1.11	pleckstrin homology domain containing, family O member 1 [Source:MGI Symbol;Acc:MGI:1914470]
Rpl22	8.63	9.29	9.49	9.08	10.4	9.66	8.78	8.78	9.24	8.31	9.49	2.89	1e-06	6.05e-05	6.11	5.86	-1.54	0.129	0.274	-0.242	-1.18	ribosomal protein L22 [Source:MGI Symbol;Acc:MGI:99262]
Ccni	7.93	7.94	7.82	8.21	8.84	8.3	7.54	8.18	8.23	7.5	7.95	2.88	1e-06	6.05e-05	7.15	7.51	2.98	0.0044	0.0324	0.402	1.32	cyclin I [Source:MGI Symbol;Acc:MGI:1341077]
Plxdc2	7.83	7.21	7.55	8.04	8.97	8.56	7.27	8.09	7.92	7.35	7.3	2.88	1e-06	6.05e-05	4.64	5.29	4.1	0.000146	0.00715	0.729	1.66	plexin domain containing 2 [Source:MGI Symbol;Acc:MGI:1914698]
Sdcbp	7.77	8.13	8.42	8.4	9.25	8.51	7.88	8.3	8.53	8.24	7.97	2.88	1e-06	6.05e-05	7.03	7.03	-0.986	0.329	0.51	-0.167	-1.12	syndecan binding protein [Source:MGI Symbol;Acc:MGI:1337026]
Trim30a	7.52	7.8	8.02	7.96	8.72	8.13	7.17	7.95	7.91	7.22	7.21	2.87	1e-06	6.05e-05	1.03	1.64	1.44	0.155	0.309	0.431	1.35	tripartite motif-containing 30A [Source:MGI Symbol;Acc:MGI:98178]
Limd2	7.56	7.26	7.36	8.03	8.65	8.13	7.14	8.01	7.94	7.5	7.41	2.86	1e-06	6.05e-05	4.22	3.39	-3.03	0.00385	0.0301	-0.712	-1.64	LIM domain containing 2 [Source:MGI Symbol;Acc:MGI:1915053]
Arrb2	7.58	7.21	7.38	8.04	8.55	8.09	7.27	7.89	7.96	7.48	7.27	2.85	1e-06	6.05e-05	6.53	6.04	-2.83	0.00657	0.0407	-0.354	-1.28	arrestin, beta 2 [Source:MGI Symbol;Acc:MGI:99474]
Gfm2	7.53	7.26	7.3	8.01	8.48	8.05	7.2	7.84	7.94	7.32	7.39	2.85	1e-06	6.05e-05	5.25	5.29	0.082	0.935	0.963	0.00736	1.01	G elongation factor, mitochondrial 2 [Source:MGI Symbol;Acc:MGI:2444783]
Dusp2	7.52	7.22	7.49	7.97	8.45	8.02	7.13	7.84	7.89	7.23	7.22	2.81	1e-06	6.05e-05	0.221	-0.487	-2.15	0.0362	0.118	-1.35	-2.55	dual specificity phosphatase 2 [Source:MGI Symbol;Acc:MGI:101911]
Csnk1e	7.76	7.49	7.6	8.29	8.64	8.15	7.32	7.92	8.08	7.68	7.52	2.79	1e-06	6.05e-05	6.5	6.26	-1.86	0.0683	0.18	-0.247	-1.19	casein kinase 1, epsilon [Source:MGI Symbol;Acc:MGI:1351660]
Gusb	7.68	7.36	7.63	8.11	8.74	8.17	7.21	8.11	8.08	7.56	7.45	2.79	1e-06	6.05e-05	3.99	3.79	-1.59	0.119	0.26	-0.223	-1.17	glucuronidase, beta [Source:MGI Symbol;Acc:MGI:95872]
Rap1b	7.81	7.77	8.34	8.19	9.03	8.53	7.42	8.2	8.19	7.53	7.79	2.76	1e-06	6.05e-05	5.51	5.62	0.979	0.332	0.513	0.122	1.09	RAS related protein 1b [Source:MGI Symbol;Acc:MGI:894315]
Srgap2	7.6	7.79	7.68	8.01	8.62	8.22	7.46	8.01	7.94	7.3	7.35	2.74	1e-06	6.05e-05	6.46	6.73	2.85	0.0063	0.0398	0.29	1.22	SLIT-ROBO Rho GTPase activating protein 2 [Source:MGI Symbol;Acc:MGI:109605]
Gns	7.62	7.28	7.47	8.11	8.74	8.21	7.84	8.09	8.14	7.55	7.65	2.73	1e-06	6.05e-05	7.53	7.54	-0.313	0.755	0.852	-0.0263	-1.02	glucosamine (N-acetyl)-6-sulfatase [Source:MGI Symbol;Acc:MGI:1922862]
F11r	7.52	7.77	8.21	7.97	8.82	8.08	7.3	7.84	7.97	7.22	7.68	2.73	1e-06	6.05e-05	2.64	2.63	-0.282	0.779	0.867	-0.0745	-1.05	F11 receptor [Source:MGI Symbol;Acc:MGI:1321398]
Mertk	7.53	7.52	7.67	8	8.87	8.13	7.16	8.23	8	7.22	7.26	2.73	1e-06	6.05e-05	5.33	5.57	1.93	0.0595	0.164	0.219	1.16	c-mer proto-oncogene tyrosine kinase [Source:MGI Symbol;Acc:MGI:96965]
Ptp4a2	8.55	8.36	8.16	8.77	9.25	8.71	8.5	8.57	8.39	8.02	8.32	2.72	1e-06	6.05e-05	7.49	7.74	2.16	0.0357	0.117	0.3	1.23	protein tyrosine phosphatase 4a2 [Source:MGI Symbol;Acc:MGI:1277117]
Cebpa	7.52	7.17	7.3	7.96	8.48	8.08	7.17	7.89	7.91	7.22	7.29	2.71	1e-06	6.05e-05	2.48	2.15	-1.26	0.212	0.38	-0.32	-1.25	CCAAT/enhancer binding protein (C/EBP), alpha [Source:MGI Symbol;Acc:MGI:99480]
Tpm3	8.37	8.68	8.7	8.56	9.46	8.77	7.92	8.06	8.49	8.43	8.26	2.7	1e-06	6.05e-05	6.18	6.1	-0.469	0.641	0.774	-0.0549	-1.04	tropomyosin 3, gamma [Source:MGI Symbol;Acc:MGI:1890149]
Scamp2	8.38	7.53	7.76	8.37	9.17	8.52	7.63	8.51	8.25	7.35	7.77	2.69	1e-06	6.05e-05	4.71	4.5	-1.25	0.216	0.385	-0.151	-1.11	secretory carrier membrane protein 2 [Source:MGI Symbol;Acc:MGI:1346518]
Arl5c	7.52	7.17	7.36	7.99	8.45	8.13	7.13	7.89	7.96	7.22	7.24	2.68	1e-06	6.05e-05	-0.257	-0.276	0.571	0.57	0.721	0.245	1.18	ADP-ribosylation factor-like 5C [Source:MGI Symbol;Acc:MGI:3028577]
Rpl39	8.49	8.67	9.52	8.9	10.3	9.44	8.13	8.57	9.19	8.57	9.05	2.66	1e-06	6.05e-05	5.71	5.99	1.07	0.288	0.467	0.429	1.35	ribosomal protein L39 [Source:MGI Symbol;Acc:MGI:1914498]
Celf2	7.58	7.28	7.68	8.49	8.87	8.29	7.78	8.12	8.43	7.86	8.03	2.65	1e-06	6.05e-05	8.01	8.28	2.3	0.0255	0.0946	0.406	1.32	CUGBP, Elav-like family member 2 [Source:MGI Symbol;Acc:MGI:1338822]
Lgals9	7.53	8.33	8.33	7.96	8.98	8.63	7.24	7.89	7.9	7.22	7.31	2.62	1e-06	6.05e-05	1.57	1.51	0.324	0.747	0.847	0.087	1.06	lectin, galactose binding, soluble 9 [Source:MGI Symbol;Acc:MGI:109496]
Ang	7.52	7.25	7.36	7.97	8.44	8.12	7.53	7.84	7.96	7.22	7.29	2.61	1e-06	6.05e-05	0.38	0.521	0.36	0.72	0.829	0.122	1.09	angiogenin, ribonuclease, RNase A family, 5 [Source:MGI Symbol;Acc:MGI:88022]
Ifi30	7.53	7.17	7.47	7.99	8.66	8.3	7.13	7.84	7.91	7.23	7.38	2.6	1e-06	6.05e-05	0.665	0.226	-0.989	0.327	0.508	-0.396	-1.32	interferon gamma inducible protein 30 [Source:MGI Symbol;Acc:MGI:2137648]
Gdi2	8.21	8.16	8.48	8.58	9.35	8.54	7.99	8.77	8.53	8.43	8.15	2.59	1e-06	6.05e-05	7.95	8.17	2.67	0.0102	0.0534	0.335	1.26	guanosine diphosphate (GDP) dissociation inhibitor 2 [Source:MGI Symbol;Acc:MGI:99845]
Sepp1	8.53	11.6	9.54	8.01	12.1	10.3	7.64	11.1	8.55	7.25	7.73	2.57	1e-06	6.05e-05	8.98	9.34	2.84	0.0065	0.0405	0.472	1.39	selenoprotein P, plasma, 1 [Source:MGI Symbol;Acc:MGI:894288]
Runx1	7.52	7.17	7.3	7.96	8.41	8.1	7.18	7.84	7.89	7.22	7.51	2.56	1e-06	6.05e-05	1.08	1.16	0.423	0.674	0.796	0.12	1.09	runt related transcription factor 1 [Source:MGI Symbol;Acc:MGI:99852]
Rpl35a	8.18	8.68	9.06	8.7	9.81	9.11	8.03	8.37	8.81	8.75	8.82	2.55	1e-06	6.05e-05	3.55	2.95	-2.27	0.0275	0.0987	-0.843	-1.79	ribosomal protein L35A [Source:MGI Symbol;Acc:MGI:1928894]
Slc15a3	7.52	7.19	7.46	7.96	8.46	8.07	7.13	7.89	7.89	7.23	7.21	2.54	1e-06	6.05e-05	0.231	-0.919	-2.34	0.0231	0.089	-1.23	-2.34	solute carrier family 15, member 3 [Source:MGI Symbol;Acc:MGI:1929691]
Abhd12	8.17	7.38	7.38	8.52	9.02	8.29	7.25	8.39	8.06	7.91	7.5	2.53	1e-06	6.05e-05	7.62	7.6	-0.393	0.696	0.812	-0.0492	-1.03	abhydrolase domain containing 12 [Source:MGI Symbol;Acc:MGI:1923442]
Cttnbp2nl	7.69	7.84	8.03	8.23	8.56	8.15	7.26	7.95	7.96	7.3	7.31	2.53	1e-06	6.05e-05	5.03	5.3	2.24	0.0297	0.104	0.287	1.22	CTTNBP2 N-terminal like [Source:MGI Symbol;Acc:MGI:1933137]
Stab1	7.52	7.42	7.67	7.96	8.51	8.21	7.14	7.89	7.9	7.23	7.27	2.5	1e-06	6.05e-05	4.47	4.2	-2.39	0.0204	0.0825	-0.458	-1.37	stabilin 1 [Source:MGI Symbol;Acc:MGI:2178742]
Tab2	8.05	7.54	7.71	8.09	8.7	8.35	7.53	7.99	8.38	7.59	7.91	2.48	1e-06	6.05e-05	6.27	6.24	-0.345	0.732	0.837	-0.0315	-1.02	TGF-beta activated kinase 1/MAP3K7 binding protein 2 [Source:MGI Symbol;Acc:MGI:1915902]
Tln1	8.07	8.25	8.21	8.21	9	8.46	7.52	8.33	8.23	7.83	7.83	2.48	1e-06	6.05e-05	6.49	6.54	0.143	0.887	0.935	0.0232	1.02	talin 1 [Source:MGI Symbol;Acc:MGI:1099832]
Tpd52	8.46	8.33	7.87	7.99	8.72	8.12	7.28	7.95	8.03	7.66	8.1	2.46	1e-06	6.05e-05	6.41	6.46	1.75	0.0867	0.211	0.218	1.16	tumor protein D52 [Source:MGI Symbol;Acc:MGI:107749]
Fam102b	7.62	7.32	7.3	8.1	8.49	8.1	7.36	7.95	8.07	7.34	7.42	2.46	2e-06	9.58e-05	5.17	5.63	2.92	0.00522	0.0357	0.489	1.4	family with sequence similarity 102, member B [Source:MGI Symbol;Acc:MGI:3036259]
Irf5	7.53	7.24	7.41	7.97	8.41	8.02	7.18	7.89	7.89	7.23	7.22	2.46	2e-06	9.58e-05	1.38	0.955	-1.22	0.229	0.401	-0.354	-1.28	interferon regulatory factor 5 [Source:MGI Symbol;Acc:MGI:1350924]
Bmp2k	7.67	7.29	7.36	7.99	8.7	8.08	7.56	8.15	7.93	7.24	7.33	2.46	1e-06	6.05e-05	4.07	4.66	3.73	0.000479	0.0109	0.636	1.55	BMP2 inducible kinase [Source:MGI Symbol;Acc:MGI:2155456]
Slc9a9	7.7	7.17	7.3	8.1	8.38	8.05	7.13	7.84	7.9	7.24	7.3	2.45	2e-06	9.58e-05	3.42	3.38	-0.819	0.416	0.595	-0.147	-1.11	solute carrier family 9 (sodium/hydrogen exchanger), member 9 [Source:MGI Symbol;Acc:MGI:2679732]
Mrc1	7.52	7.17	7.36	7.96	8.54	8.26	7.14	7.84	7.89	7.22	7.21	2.45	2e-06	9.58e-05	0.562	1.27	0.852	0.398	0.578	0.509	1.42	mannose receptor, C type 1 [Source:MGI Symbol;Acc:MGI:97142]
Pmepa1	7.68	7.34	7.76	8.02	8.59	8.29	7.73	8.01	7.94	7.29	7.29	2.42	2e-06	9.58e-05	5.48	5.46	0.745	0.46	0.632	0.126	1.09	prostate transmembrane protein, androgen induced 1 [Source:MGI Symbol;Acc:MGI:1929600]
Actr2	8.06	7.75	8.38	8.48	9.06	8.29	7.67	8.37	8.32	8.01	7.87	2.41	2e-06	9.58e-05	8.2	8.68	3.71	0.000508	0.0111	0.575	1.49	ARP2 actin-related protein 2 [Source:MGI Symbol;Acc:MGI:1913963]
Camk1d	7.52	7.19	7.41	7.99	8.42	8.1	7.45	7.92	7.91	7.31	7.22	2.4	2e-06	9.58e-05	6.13	6.35	1.58	0.121	0.264	0.247	1.19	calcium/calmodulin-dependent protein kinase ID [Source:MGI Symbol;Acc:MGI:2442190]
Rps15	8.78	9.27	9.54	8.9	10.2	9.37	8.37	8.57	9.28	8.93	9.56	2.39	2e-06	9.58e-05	6.71	6.25	-1.39	0.17	0.329	-0.492	-1.41	ribosomal protein S15 [Source:MGI Symbol;Acc:MGI:98117]
Aim2	7.56	7.24	7.3	7.96	8.36	8.06	7.14	7.84	7.89	7.23	7.22	2.38	2e-06	9.58e-05	1.64	2.08	0.298	0.767	0.859	0.0834	1.06	absent in melanoma 2 [Source:MGI Symbol;Acc:MGI:2686159]
Ucp2	7.52	7.5	7.57	7.97	8.56	8.05	7.36	7.95	8.09	7.39	7.9	2.38	2e-06	9.58e-05	7.09	6.46	-3.63	0.000649	0.0124	-0.656	-1.58	uncoupling protein 2 (mitochondrial, proton carrier) [Source:MGI Symbol;Acc:MGI:109354]
Cfl1	9.6	8.31	8.76	9.56	9.88	8.8	8.07	8.86	8.91	8.77	9.03	2.37	2e-06	9.58e-05	9.28	9.17	-0.28	0.781	0.868	-0.0326	-1.02	cofilin 1, non-muscle [Source:MGI Symbol;Acc:MGI:101757]
Ptbp3	7.68	8.16	7.92	8.31	8.59	8.25	7.32	7.95	7.97	7.39	7.91	2.36	2e-06	9.58e-05	4.92	5.4	2.64	0.011	0.0558	0.59	1.51	polypyrimidine tract binding protein 3 [Source:MGI Symbol;Acc:MGI:1923334]
Cmtm6	7.59	7.59	7.74	8.01	8.52	8.13	7.23	8.06	8	7.24	7.48	2.36	2e-06	9.58e-05	5.11	5.16	1.43	0.159	0.315	0.152	1.11	CKLF-like MARVEL transmembrane domain containing 6 [Source:MGI Symbol;Acc:MGI:2447165]
Daglb	7.8	7.38	7.47	8.15	8.56	8.07	7.38	8.01	8.03	7.42	7.41	2.34	2e-06	9.58e-05	5.07	5.19	0.51	0.612	0.753	0.0777	1.06	diacylglycerol lipase, beta [Source:MGI Symbol;Acc:MGI:2442032]
Rps20	8.77	9.5	9.81	9.13	10.5	10.1	8.35	8.71	9.45	8.83	9.78	2.32	2e-06	9.58e-05	6.37	6.19	-0.697	0.489	0.656	-0.156	-1.11	ribosomal protein S20 [Source:MGI Symbol;Acc:MGI:1914677]
Ik	8.76	8.27	8.58	8.84	9.28	8.58	8.48	8.67	8.94	8.98	8.86	2.31	2e-06	9.58e-05	6.97	6.53	-2.39	0.0203	0.0823	-0.436	-1.35	IK cytokine [Source:MGI Symbol;Acc:MGI:1345142]
Ddx26b	7.68	7.35	7.58	8.24	8.46	8.13	7.37	7.89	8.08	7.36	7.52	2.31	2e-06	9.58e-05	6.13	6.74	4.25	8.85e-05	0.00614	0.577	1.49	DEAD/H (Asp-Glu-Ala-Asp/His) box polypeptide 26B [Source:MGI Symbol;Acc:MGI:2442593]
Itm2b	10.3	10.6	11.5	10.1	12.1	11.4	10.7	11.1	11.4	10.5	11.4	2.31	2e-06	9.58e-05	9.28	9.25	-0.873	0.387	0.565	-0.0864	-1.06	integral membrane protein 2B [Source:MGI Symbol;Acc:MGI:1309517]
Rpsa	8.11	7.53	8.14	8.37	8.78	8.44	7.53	8.18	8.28	7.72	8.1	2.3	2e-06	9.58e-05	6.26	5.46	-2.8	0.00711	0.0427	-0.733	-1.66	ribosomal protein SA [Source:MGI Symbol;Acc:MGI:105381]
Rpl6	7.83	7.93	7.86	8.25	8.76	8.34	7.42	8.2	8.28	8.1	8.06	2.29	2e-06	9.58e-05	6.02	5.24	-3.2	0.00233	0.0229	-0.813	-1.76	ribosomal protein L6 [Source:MGI Symbol;Acc:MGI:108057]
Brk1	8.57	8.02	8.06	8.59	9.25	8.59	7.95	8.62	8.7	8.47	8.3	2.28	2e-06	9.58e-05	6.69	6.43	-0.798	0.428	0.605	-0.126	-1.09	BRICK1, SCAR/WAVE actin-nucleating complex subunit [Source:MGI Symbol;Acc:MGI:1915406]
Il10rb	7.52	8.21	7.76	8	8.49	8.18	7.19	7.95	8.02	7.27	7.65	2.28	2e-06	9.58e-05	1.86	1.66	-1.28	0.207	0.374	-0.321	-1.25	interleukin 10 receptor, beta [Source:MGI Symbol;Acc:MGI:109380]
Sh3glb1	9.02	9.18	8.61	8.75	9.52	8.58	8.06	8.63	8.57	7.55	7.8	2.27	2e-06	9.58e-05	5.87	6.08	2.24	0.0292	0.103	0.262	1.2	SH3-domain GRB2-like B1 (endophilin) [Source:MGI Symbol;Acc:MGI:1859730]
Arpc4	8.14	7.92	8.02	8.44	9.11	8.48	7.8	8.46	8.27	7.94	7.83	2.27	2e-06	9.58e-05	6.74	6.52	-1.28	0.205	0.372	-0.194	-1.14	actin related protein 2/3 complex, subunit 4 [Source:MGI Symbol;Acc:MGI:1915339]
Psme1	7.62	8.26	8.41	8.16	9	8.6	7.5	8.23	8.54	8.22	8.16	2.25	2e-06	9.58e-05	5.23	4.76	-2.21	0.0315	0.108	-0.407	-1.33	proteasome (prosome, macropain) activator subunit 1 (PA28 alpha) [Source:MGI Symbol;Acc:MGI:1096367]
Rpl29	7.99	7.97	7.98	8.37	8.92	8.29	7.46	8.34	8.16	7.74	7.93	2.24	2e-06	9.58e-05	1.67	1.21	-2.12	0.0388	0.124	-1.15	-2.22	ribosomal protein L29 [Source:MGI Symbol;Acc:MGI:99687]
Nuak1	7.57	7.24	7.51	7.97	8.38	8.09	7.2	7.84	7.91	7.29	7.29	2.22	2e-06	9.58e-05	5.61	5.62	-0.771	0.444	0.619	-0.107	-1.08	NUAK family, SNF1-like kinase, 1 [Source:MGI Symbol;Acc:MGI:1925226]
Rrbp1	8.74	8.57	8.65	8.62	9.97	9.58	8.48	8.95	8.5	7.71	8.37	2.22	2e-06	9.58e-05	5.74	5.16	-3.68	0.000551	0.0114	-0.597	-1.51	ribosome binding protein 1 [Source:MGI Symbol;Acc:MGI:1932395]
Pnp	7.56	7.43	7.79	7.99	8.46	8.1	7.27	7.98	8.05	7.33	7.56	2.22	2e-06	9.58e-05	4.04	3.75	-1.4	0.167	0.325	-0.239	-1.18	purine-nucleoside phosphorylase [Source:MGI Symbol;Acc:MGI:97365]
Zfp36	7.53	7.77	8.24	7.97	8.85	8.45	7.36	7.84	8.21	7.23	8.33	2.21	2e-06	9.58e-05	3.2	3.18	-0.64	0.525	0.685	-0.156	-1.11	zinc finger protein 36 [Source:MGI Symbol;Acc:MGI:99180]
Nfkbiz	7.53	7.17	7.75	7.97	8.46	8.18	7.17	7.95	8.08	7.26	7.55	2.18	2e-06	9.58e-05	2.01	2.06	-0.0494	0.961	0.979	-0.0116	-1.01	nuclear factor of kappa light polypeptide gene enhancer in B cells inhibitor, zeta [Source:MGI Symbol;Acc:MGI:1931595]
Rps3	9.97	10.3	10.5	9.74	11.2	10.5	9.31	9.28	10.3	10.2	10.5	2.17	2e-06	9.58e-05	7.46	6.72	-3.59	0.000724	0.0131	-0.707	-1.63	ribosomal protein S3 [Source:MGI Symbol;Acc:MGI:1350917]
Rps21	9.35	9.65	10.1	9.25	10.8	10.3	9.08	9.36	10.2	9.79	10.2	2.15	2e-06	9.58e-05	7.02	6.74	-1.07	0.288	0.467	-0.29	-1.22	ribosomal protein S21 [Source:MGI Symbol;Acc:MGI:1913731]
Ubash3b	7.58	7.19	7.3	7.99	8.31	8.02	7.15	7.84	7.91	7.31	7.28	2.14	2e-06	9.58e-05	5.55	5.61	0.112	0.912	0.949	0.0148	1.01	ubiquitin associated and SH3 domain containing, B [Source:MGI Symbol;Acc:MGI:1920078]
Mtdh	9.01	8.03	8.19	9.16	9.69	9.04	8.57	9.1	9.16	8.49	9.05	2.12	2e-06	9.58e-05	6.57	6.76	1.63	0.11	0.247	0.31	1.24	metadherin [Source:MGI Symbol;Acc:MGI:1914404]
Rel	7.56	7.19	7.3	7.99	8.34	8.04	7.13	7.84	7.89	7.24	7.34	2.12	2e-06	9.58e-05	1.72	2.7	3.33	0.00163	0.0192	1.05	2.08	reticuloendotheliosis oncogene [Source:MGI Symbol;Acc:MGI:97897]
P2rx7	7.54	7.19	7.36	8.04	8.31	8.08	7.28	7.84	7.9	7.22	7.21	2.08	2e-06	9.58e-05	3.56	3.63	0.605	0.548	0.703	0.091	1.07	purinergic receptor P2X, ligand-gated ion channel, 7 [Source:MGI Symbol;Acc:MGI:1339957]
Cflar	7.56	7.93	7.84	8.02	8.67	8.39	7.35	7.89	8.14	7.28	7.67	2.08	2e-06	9.58e-05	4.61	4.76	1.06	0.296	0.476	0.162	1.12	CASP8 and FADD-like apoptosis regulator [Source:MGI Symbol;Acc:MGI:1336166]
Plekhf2	7.54	7.33	7.41	7.98	8.31	8.07	7.37	7.84	8.06	7.24	7.44	2.07	2e-06	9.58e-05	3.18	3.21	0.382	0.704	0.817	0.0661	1.05	pleckstrin homology domain containing, family F (with FYVE domain) member 2 [Source:MGI Symbol;Acc:MGI:1919051]
Rab3il1	7.52	7.19	7.36	7.97	8.43	8.18	7.14	7.89	7.9	7.24	7.23	2.04	2e-06	9.58e-05	2.34	2.14	-1.26	0.214	0.382	-0.298	-1.23	RAB3A interacting protein (rabin3)-like 1 [Source:MGI Symbol;Acc:MGI:1922010]
Cyfip1	7.79	7.95	8.16	8.36	9.33	8.32	7.72	8.76	8.19	7.33	7.57	2.04	2e-06	9.58e-05	6.94	6.99	0.628	0.533	0.691	0.063	1.04	cytoplasmic FMR1 interacting protein 1 [Source:MGI Symbol;Acc:MGI:1338801]
Adrbk1	7.58	7.35	7.52	8.03	8.35	8.05	7.24	7.89	7.93	7.4	7.3	2.03	2e-06	9.58e-05	7.99	7.82	-2.03	0.048	0.142	-0.224	-1.17	adrenergic receptor kinase, beta 1 [Source:MGI Symbol;Acc:MGI:87940]
Fez2	7.76	7.63	7.96	8.11	8.45	8.19	7.31	7.84	8.24	7.46	7.3	2.03	2e-06	9.58e-05	5.15	5.05	-0.581	0.564	0.715	-0.0918	-1.07	fasciculation and elongation protein zeta 2 (zygin II) [Source:MGI Symbol;Acc:MGI:2675856]
Rps28	7.97	7.75	8.42	8.27	8.86	8.43	7.57	8.12	8.22	7.8	7.99	2.01	2e-06	9.58e-05	3.83	2.92	-2.5	0.0155	0.0692	-1.28	-2.42	ribosomal protein S28 [Source:MGI Symbol;Acc:MGI:1859516]

## Sheet: Endothelial cell
Symbol	Oligodend.avg	EndothelialCells.avg	MuralCells.avg	NG.OPC.avg	PVMMicro.avg	Fibroblast.avg	Ependymocytes.avg	Astrocyte.avg	Tanycyte.avg	Neurons.avg	ParsTuber.avg	EndothelialCells.min.t	EndothelialCells.p	EndothelialCells.FDR	HTM.Basal_3h.avg	HTM.Low_3h.avg	HTM_Low_3h.t	HTM_Low_3h.p	HTM_Low_3h.FDR	HTM_Low_3h.logFC	HTM_Low_3h.FC	Description
Bsg	8.26	13.3	9.47	9.24	8.73	9.34	8.51	8.95	9.28	9.53	9.6	13.5	1e-06	2.99e-05	8.42	8.18	-1	0.32	0.501	-0.166	-1.12	basigin [Source:MGI Symbol;Acc:MGI:88208]
Slco1c1	7.52	11.1	8.18	7.97	7.98	8.05	7.14	7.92	7.93	7.22	7.21	11.9	1e-06	2.99e-05	4.64	4.67	0.385	0.702	0.816	0.0753	1.05	solute carrier organic anion transporter family, member 1c1 [Source:MGI Symbol;Acc:MGI:1889679]
Slco1a4	7.52	11.2	8.32	7.97	7.98	8.13	7.15	7.84	7.9	7.22	7.21	11.7	1e-06	2.99e-05	5.71	6.26	3.69	0.000539	0.0113	0.597	1.51	solute carrier organic anion transporter family, member 1a4 [Source:MGI Symbol;Acc:MGI:1351896]
Cldn5	7.52	10.8	8.42	7.96	7.96	8	7.13	7.84	7.89	7.22	7.23	9.46	1e-06	2.99e-05	4.95	4.45	-1.23	0.225	0.397	-0.313	-1.24	claudin 5 [Source:MGI Symbol;Acc:MGI:1276112]
Spock2	7.59	10.7	7.99	8.3	8.01	8.24	7.18	8.12	7.96	8.46	7.88	9.44	1e-06	2.99e-05	10.3	10	-2.49	0.0159	0.0704	-0.243	-1.18	sparc/osteonectin, cwcv and kazal-like domains proteoglycan 2 [Source:MGI Symbol;Acc:MGI:1891351]
Itm2a	7.55	12	9.39	8.15	7.98	9.24	7.27	8.01	8.07	7.4	7.3	9.08	1e-06	2.99e-05	4.77	4.91	1.13	0.266	0.442	0.166	1.12	integral membrane protein 2A [Source:MGI Symbol;Acc:MGI:107706]
Abcb1a	7.53	11	8.96	7.96	7.96	8.03	7.13	7.84	7.89	7.22	7.21	8.07	1e-06	2.99e-05	4.13	4.61	2.59	0.0124	0.0601	0.442	1.36	ATP-binding cassette, sub-family B (MDR/TAP), member 1A [Source:MGI Symbol;Acc:MGI:97570]
Ablim1	7.54	10	8.12	7.96	7.98	8.07	8.35	8.01	8.09	7.4	7.72	7.71	1e-06	2.99e-05	7.4	7.52	0.797	0.429	0.606	0.0908	1.06	actin-binding LIM protein 1 [Source:MGI Symbol;Acc:MGI:1194500]
Slc2a1	7.78	10.7	8.3	7.97	8.11	8.02	9.35	8.42	8.24	7.29	7.74	7.64	1e-06	2.99e-05	8.17	8	-0.91	0.367	0.547	-0.167	-1.12	solute carrier family 2 (facilitated glucose transporter), member 1 [Source:MGI Symbol;Acc:MGI:95755]
9430020K01Rik	7.56	9.71	7.96	7.96	7.96	8.17	7.16	7.84	7.89	7.22	7.22	6.96	1e-06	2.99e-05	5.18	5.52	1.29	0.202	0.368	0.255	1.19	RIKEN cDNA 9430020K01 gene [Source:MGI Symbol;Acc:MGI:2685174]
Cxcl12	7.61	10.5	8.75	7.96	7.96	9.2	7.23	7.84	7.93	7.24	7.36	6.81	1e-06	2.99e-05	4.45	4.49	-0.104	0.917	0.953	-0.0189	-1.01	chemokine (C-X-C motif) ligand 12 [Source:MGI Symbol;Acc:MGI:103556]
Car4	7.52	9.58	8.01	7.96	7.96	8	7.13	7.84	7.89	7.23	7.22	6.42	1e-06	2.99e-05	3.52	3.25	-1.29	0.202	0.368	-0.294	-1.23	carbonic anhydrase 4 [Source:MGI Symbol;Acc:MGI:1096574]
Vwa1	7.68	9.71	8.08	8.04	8.05	8.5	7.32	8.01	7.97	7.3	7.51	6.27	1e-06	2.99e-05	4.43	4.16	-1.17	0.249	0.423	-0.231	-1.17	von Willebrand factor A domain containing 1 [Source:MGI Symbol;Acc:MGI:2179729]
Slc39a10	7.61	9.81	8.08	8.14	8.07	8.12	7.29	7.98	8.14	7.75	7.58	6.16	1e-06	2.99e-05	6.48	7	2.54	0.014	0.0646	0.447	1.36	solute carrier family 39 (zinc transporter), member 10 [Source:MGI Symbol;Acc:MGI:1914515]
Sema3c	7.52	9.18	7.72	7.97	7.96	8.06	7.14	7.84	7.9	7.25	7.21	5.53	1e-06	2.99e-05	4.48	4.91	2	0.0505	0.147	0.394	1.31	sema domain, immunoglobulin domain (Ig), short basic domain, secreted, (semaphorin) 3C [Source:MGI Symbol;Acc:MGI:107557]
Fn1	7.52	9.27	7.79	7.97	7.98	8.26	7.19	7.84	7.9	7.23	7.4	5.48	1e-06	2.99e-05	5.66	5.87	0.415	0.68	0.8	0.0853	1.06	fibronectin 1 [Source:MGI Symbol;Acc:MGI:95566]
Nostrin	7.52	9.28	7.92	7.96	7.98	8.03	7.14	7.84	7.89	7.22	7.22	5.29	1e-06	2.99e-05	2.51	2.3	-0.682	0.498	0.664	-0.178	-1.13	nitric oxide synthase trafficker [Source:MGI Symbol;Acc:MGI:3606242]
Abcg2	7.62	9.66	8.4	8.08	8.15	8.23	7.15	7.89	7.9	7.26	7.22	5.28	1e-06	2.99e-05	4.18	4.23	0.386	0.701	0.815	0.0535	1.04	ATP-binding cassette, sub-family G (WHITE), member 2 [Source:MGI Symbol;Acc:MGI:1347061]
Flt1	7.52	11.9	10.4	7.96	7.96	8.08	7.17	7.84	8.07	7.23	7.22	5.21	1e-06	2.99e-05	6.53	6.5	0.543	0.589	0.736	0.105	1.08	FMS-like tyrosine kinase 1 [Source:MGI Symbol;Acc:MGI:95558]
Slc7a5	7.52	9.04	7.49	8.02	8.02	8.06	7.15	7.89	7.9	7.26	7.25	4.69	1e-06	2.99e-05	6.83	6.91	0.129	0.898	0.941	0.0161	1.01	solute carrier family 7 (cationic amino acid transporter, y+ system), member 5 [Source:MGI Symbol;Acc:MGI:1298205]
Ccdc141	7.52	9.2	7.68	7.97	7.96	8.06	7.24	8.03	7.93	7.23	7.35	4.67	1e-06	2.99e-05	4.84	5.44	3.16	0.00262	0.0245	0.635	1.55	coiled-coil domain containing 141 [Source:MGI Symbol;Acc:MGI:1919735]
Pltp	7.55	11.9	9.37	7.97	8.07	8.56	11	8.37	8.42	7.23	7.44	4.58	1e-06	2.99e-05	5.29	4.86	-2.03	0.0475	0.141	-0.61	-1.53	phospholipid transfer protein [Source:MGI Symbol;Acc:MGI:103151]
Hbb-bs	7.61	9.1	7.36	8.01	7.99	8.05	7.19	7.89	7.93	7.29	7.28	4.55	1e-06	2.99e-05	3.29	3.45	-0.441	0.661	0.788	-0.219	-1.16	hemoglobin, beta adult s chain [Source:MGI Symbol;Acc:MGI:5474852]
Ly6c1	7.52	12.1	10.8	7.96	7.99	8.07	7.13	7.84	7.89	7.23	7.32	4.53	1e-06	2.99e-05	4.25	4.3	-0.669	0.506	0.67	-0.108	-1.08	lymphocyte antigen 6 complex, locus C1 [Source:MGI Symbol;Acc:MGI:96882]
Ptprb	7.57	10.5	9.29	7.96	7.96	8.03	7.13	7.84	7.89	7.23	7.23	4.52	1e-06	2.99e-05	4.46	5.22	4.08	0.000158	0.00746	0.773	1.71	protein tyrosine phosphatase, receptor type, B [Source:MGI Symbol;Acc:MGI:97809]
Sgms1	7.59	9.37	8.28	8.09	8.01	8.09	7.22	8.01	7.97	7.35	7.65	3.89	1e-06	2.99e-05	6.5	6.81	2.63	0.0112	0.0565	0.426	1.34	sphingomyelin synthase 1 [Source:MGI Symbol;Acc:MGI:2444110]
Ramp2	7.6	10	8.98	8.21	7.98	9.06	7.13	7.95	7.9	7.24	7.23	3.84	1e-06	2.99e-05	3.97	3.77	-0.701	0.486	0.654	-0.112	-1.08	receptor (calcitonin) activity modifying protein 2 [Source:MGI Symbol;Acc:MGI:1859650]
Adgrf5	7.52	10.7	9.78	7.96	8	8.06	7.13	7.84	7.9	7.23	7.22	3.65	1e-06	2.99e-05	5.62	5.94	2.34	0.0232	0.0891	0.354	1.28	adhesion G protein-coupled receptor F5 [Source:MGI Symbol;Acc:MGI:2182928]
Prom1	7.68	8.76	7.74	7.97	7.96	8	7.26	7.84	7.89	7.22	7.25	3.6	1e-06	2.99e-05	3.25	3.78	2.92	0.00517	0.0355	0.626	1.54	prominin 1 [Source:MGI Symbol;Acc:MGI:1100886]
Kitl	7.52	9.64	8.68	7.96	8.05	8.18	7.19	7.84	7.95	7.24	7.49	3.57	1e-06	2.99e-05	4.08	4.92	3.21	0.00225	0.0225	0.974	1.96	kit ligand [Source:MGI Symbol;Acc:MGI:96974]
Gpcpd1	7.7	8.91	7.79	8.13	8.01	8.03	7.24	8.01	7.98	7.34	7.54	3.32	1e-06	2.99e-05	6.67	7.17	3.59	0.00073	0.0131	0.565	1.48	glycerophosphocholine phosphodiesterase GDE1 homolog (S. cerevisiae) [Source:MGI Symbol;Acc:MGI:104898]
Slc22a8	7.52	8.76	7.64	7.96	7.96	8.19	7.14	7.84	7.89	7.22	7.21	3.3	1e-06	2.99e-05	2.76	3.06	-0.329	0.744	0.845	-0.0806	-1.06	solute carrier family 22 (organic anion transporter), member 8 [Source:MGI Symbol;Acc:MGI:1336187]
Sptbn1	8.79	11.6	10.6	8.75	8.1	9.78	8.84	9.16	9.59	9.02	8.41	3.22	1e-06	2.99e-05	9.67	9.96	2.47	0.017	0.0733	0.26	1.2	spectrin beta, non-erythrocytic 1 [Source:MGI Symbol;Acc:MGI:98388]
Tspan13	7.69	9.66	8.37	9.11	8.47	8.08	7.96	8.03	8.36	9.16	8.59	3.19	1e-06	2.99e-05	6.57	6.63	1.72	0.0913	0.219	0.297	1.23	tetraspanin 13 [Source:MGI Symbol;Acc:MGI:1913359]
Hba-a2	7.52	8.65	7.3	7.96	7.96	8.02	7.14	7.84	7.89	7.23	7.21	3.15	1e-06	2.99e-05	-0.377	-0.77	-1.11	0.27	0.447	-0.984	-1.98	hemoglobin alpha, adult chain 2 [Source:MGI Symbol;Acc:MGI:96016]
Adgrl4	7.52	9.66	8.8	7.96	7.98	8	7.14	7.84	7.89	7.22	7.21	3.14	1e-06	2.99e-05	4.94	5.28	2.17	0.0348	0.115	0.448	1.36	adhesion G protein-coupled receptor L4 [Source:MGI Symbol;Acc:MGI:2655562]
C130074G19Rik	7.52	9.04	8.27	7.96	7.96	8.07	7.13	7.84	7.89	7.22	7.21	2.98	1e-06	2.99e-05	2.81	2.47	-1.14	0.26	0.436	-0.43	-1.35	RIKEN cDNA C130074G19 gene [Source:MGI Symbol;Acc:MGI:2444831]
Esyt2	7.71	8.85	7.98	8.07	8.04	8.17	7.62	7.89	7.99	7.36	7.46	2.94	1e-06	2.99e-05	5.17	5.67	3.2	0.00235	0.023	0.541	1.46	extended synaptotagmin-like protein 2 [Source:MGI Symbol;Acc:MGI:1261845]
Ocln	7.52	8.62	7.65	7.97	7.96	8.03	7.83	7.84	8.07	7.22	7.49	2.92	1e-06	2.99e-05	2.94	3.24	0.893	0.376	0.555	0.182	1.13	occludin [Source:MGI Symbol;Acc:MGI:106183]
Hba-a1	7.52	8.64	7.3	7.97	7.99	8	7.13	7.92	7.9	7.23	7.22	2.63	1e-06	2.99e-05	2.4	2.43	-0.716	0.477	0.647	-0.391	-1.31	hemoglobin alpha, adult chain 1 [Source:MGI Symbol;Acc:MGI:96015]
Utrn	7.55	9.7	8.93	8.02	7.99	8.3	7.62	8.23	8.26	7.36	7.41	2.58	1e-06	2.99e-05	6.22	6.92	4.01	0.000195	0.0078	0.657	1.58	utrophin [Source:MGI Symbol;Acc:MGI:104631]
Slc40a1	7.52	8.53	7.55	7.96	8.11	8.05	7.18	7.84	7.89	7.22	7.24	2.51	1e-06	2.99e-05	2.97	3.37	1.64	0.106	0.242	0.285	1.22	solute carrier family 40 (iron-regulated transporter), member 1 [Source:MGI Symbol;Acc:MGI:1315204]
Grap	7.52	8.76	7.95	7.96	8.29	8.03	7.13	7.84	7.89	7.22	7.21	2.51	1e-06	2.99e-05	1.36	0.985	-0.597	0.553	0.707	-0.223	-1.17	GRB2-related adaptor protein [Source:MGI Symbol;Acc:MGI:1918770]
Sdpr	7.69	9.9	9.27	7.97	7.96	8.23	8.2	7.84	7.9	7.28	7.4	2.45	1e-06	2.99e-05	3.78	3.74	0.556	0.581	0.729	0.0944	1.07	serum deprivation response [Source:MGI Symbol;Acc:MGI:99513]
Arl4a	8.02	9.05	7.89	8.34	8	8.49	7.83	7.95	8.34	7.81	7.6	2.35	1e-06	2.99e-05	4.85	4.9	0.588	0.559	0.712	0.0959	1.07	ADP-ribosylation factor-like 4A [Source:MGI Symbol;Acc:MGI:99437]
Slc7a1	7.52	8.51	7.55	7.99	8.01	8	7.17	7.84	7.9	7.4	7.44	2.22	1e-06	2.99e-05	6.33	6.26	-1.02	0.314	0.494	-0.142	-1.1	solute carrier family 7 (cationic amino acid transporter, y+ system), member 1 [Source:MGI Symbol;Acc:MGI:88117]
Pglyrp1	7.52	8.45	7.65	7.96	7.96	8	7.13	7.84	7.89	7.22	7.21	2.21	1e-06	2.99e-05	2.14	2.11	-0.521	0.605	0.747	-0.185	-1.14	peptidoglycan recognition protein 1 [Source:MGI Symbol;Acc:MGI:1345092]
Lsr	7.52	8.51	7.85	7.97	7.99	8	7.14	7.84	7.95	7.22	7.74	2.21	1e-06	2.99e-05	2.29	1.87	-0.858	0.395	0.574	-0.224	-1.17	lipolysis stimulated lipoprotein receptor [Source:MGI Symbol;Acc:MGI:1927471]
Palmd	7.52	9.35	8.68	8.04	7.98	8.05	7.36	7.89	7.93	7.37	7.41	2.07	1e-06	2.99e-05	3.35	3.49	0.992	0.326	0.507	0.228	1.17	palmdelphin [Source:MGI Symbol;Acc:MGI:2148896]
Erg	7.52	8.92	8.27	7.96	7.96	8	7.13	7.84	7.89	7.22	7.21	2.04	1e-06	2.99e-05	1.73	1.31	-1.27	0.21	0.378	-0.386	-1.31	avian erythroblastosis virus E-26 (v-ets) oncogene related [Source:MGI Symbol;Acc:MGI:95415]
Afap1l1	7.76	8.64	7.92	7.97	7.99	8.02	7.26	7.84	7.98	7.26	7.22	2.02	1e-06	2.99e-05	3.77	3.73	-1.16	0.25	0.425	-0.217	-1.16	actin filament associated protein 1-like 1 [Source:MGI Symbol;Acc:MGI:2147199]
Slc16a1	7.74	8.92	7.66	8.02	8.04	8.02	7.99	8.28	8.18	7.29	7.37	2.02	1e-06	2.99e-05	5.29	5.64	3.16	0.00261	0.0245	0.488	1.4	solute carrier family 16 (monocarboxylic acid transporters), member 1 [Source:MGI Symbol;Acc:MGI:106013]
Fam101b	7.52	9.11	8.48	7.98	7.98	8.09	7.56	8.01	7.99	7.32	8.55	2.01	1e-06	2.99e-05	4.61	4.52	0.583	0.563	0.715	0.0904	1.06	family with sequence similarity 101, member B [Source:MGI Symbol;Acc:MGI:1923816]
